# Supplementary material for: Dianthiamides A–E, Proline-Containing Orbitides from Dianthus chinensis
Source: MDPI journal article supplement (doi:10.3390/molecules26237275), 2021-11-30
Supplement: s1 [file s1]

**Supplementary Materials for**

**Dianthiamides A–E, Proline-Containing Orbitides**  
**from *Dianthus Chinensis***

**Jin Woo Lee<sup>1</sup>, Jun Gu Kim<sup>1</sup>, Jae Sang Han<sup>1</sup>, Yong Beom Cho<sup>1</sup>, Yu Jin Lee<sup>1</sup>, Dongho Lee<sup>2</sup>, Dae Hwan Shin<sup>1</sup>, Jin Tae Hong<sup>1</sup>, Mi Kyeong Lee<sup>1</sup> and Bang Yeon Hwang<sup>1,\*</sup>**

<sup>1</sup> College of Pharmacy, Chungbuk National University, Cheongju 28160, Korea;  
jinu15@hanmail.net (J.W.L.); sossgi@naver.com (J.G.K.); han00768@hanmail.net (J.S.H.);  
bum94@naver.com (Y.B.C.);  
yujinli@naver.com (Y.J.L.); dshin@chungbuk.ac.kr (D.H.S.); jinthong@chungbuk.ac.kr  
(J.T.H.); mkleee@chungbuk.ac.kr (M.K.L.)

<sup>2</sup> Department of Plant Biotechnology, College of Life Sciences and Biotechnology, Korea  
University, Seoul 02841, Korea; dongholee@korea.ac.kr

\* Correspondence: byhwang@chungbuk.ac.kr; Tel.: +82-43-261-2814

|                                                                                                           |     |
|-----------------------------------------------------------------------------------------------------------|-----|
| <b>Figure S1.</b> $^1\text{H}$ NMR spectrum of compound <b>1</b> ( $\text{DMSO-}d_6$ , 700 MHz).....      | S4  |
| <b>Figure S2.</b> $^{13}\text{C}$ NMR spectrum of compound <b>1</b> ( $\text{DMSO-}d_6$ , 175 MHz).....   | S5  |
| <b>Figure S3.</b> COSY spectrum of compound <b>1</b> .....                                                | S6  |
| <b>Figure S4.</b> HSQC spectrum of compound <b>1</b> .....                                                | S7  |
| <b>Figure S5.</b> HMBC spectrum of compound <b>1</b> .....                                                | S8  |
| <b>Figure S6.</b> ROESY spectrum of compound <b>1</b> .....                                               | S9  |
| <b>Figure S7.</b> ECD spectrum of compound <b>1</b> .....                                                 | S10 |
| <b>Figure S8.</b> HRESI-MS spectrum of compound <b>1</b> .....                                            | S11 |
| <b>Figure S9.</b> ESI-MS/MS spectrum of compound <b>1</b> .....                                           | S12 |
| <b>Figure S10.</b> Marfey's analysis of compound <b>1</b> .....                                           | S13 |
| <b>Figure S11.</b> $^1\text{H}$ NMR spectrum of compound <b>2</b> ( $\text{DMSO-}d_6$ , 700 MHz) .....    | S14 |
| <b>Figure S12.</b> $^{13}\text{C}$ NMR spectrum of compound <b>2</b> ( $\text{DMSO-}d_6$ , 175 MHz) ..... | S15 |
| <b>Figure S13.</b> COSY spectrum of compound <b>2</b> .....                                               | S16 |
| <b>Figure S14.</b> HSQC spectrum of compound <b>2</b> .....                                               | S17 |
| <b>Figure S15.</b> HMBC spectrum of compound <b>2</b> .....                                               | S18 |
| <b>Figure S16.</b> ROESY spectrum of compound <b>2</b> .....                                              | S19 |
| <b>Figure S17.</b> ECD spectrum of compound <b>2</b> .....                                                | S20 |
| <b>Figure S18.</b> HRESI-MS spectrum of compound <b>2</b> .....                                           | S21 |
| <b>Figure S19.</b> ESI-MS/MS spectrum of compound <b>2</b> .....                                          | S22 |
| <b>Figure S20.</b> Marfey's analysis of compound <b>2</b> .....                                           | S23 |
| <b>Figure S21.</b> $^1\text{H}$ NMR spectrum of compound <b>3</b> ( $\text{DMSO-}d_6$ , 700 MHz) .....    | S24 |
| <b>Figure S22.</b> $^{13}\text{C}$ NMR spectrum of compound <b>3</b> ( $\text{DMSO-}d_6$ , 175 MHz) ..... | S25 |
| <b>Figure S23.</b> COSY spectrum of compound <b>3</b> .....                                               | S26 |
| <b>Figure S24.</b> HSQC spectrum of compound <b>3</b> .....                                               | S27 |
| <b>Figure S25.</b> HMBC spectrum of compound <b>3</b> .....                                               | S28 |
| <b>Figure S26.</b> ROESY spectrum of compound <b>3</b> .....                                              | S29 |
| <b>Figure S27.</b> ECD spectrum of compound <b>3</b> .....                                                | S30 |
| <b>Figure S28.</b> HRESI-MS spectrum of compound <b>3</b> .....                                           | S31 |
| <b>Figure S29.</b> ESI-MS/MS spectrums of compound <b>3</b> .....                                         | S32 |
| <b>Figure S30.</b> Marfey's analysis of compound <b>3</b> .....                                           | S33 |

|                                                                                                    |     |
|----------------------------------------------------------------------------------------------------|-----|
| <b>Figure S31.</b> $^1\text{H}$ NMR spectrum of compound <b>4</b> (DMSO- $d_6$ , 700 MHz) .....    | S34 |
| <b>Figure S32.</b> $^{13}\text{C}$ NMR spectrum of compound <b>4</b> (DMSO- $d_6$ , 175 MHz) ..... | S35 |
| <b>Figure S33.</b> COSY spectrum of compound <b>4</b> .....                                        | S36 |
| <b>Figure S34.</b> HSQC spectrum of compound <b>4</b> .....                                        | S37 |
| <b>Figure S35.</b> HMBC spectrum of compound <b>4</b> .....                                        | S38 |
| <b>Figure S36.</b> ROESY spectrum of compound <b>4</b> .....                                       | S39 |
| <b>Figure S37.</b> ECD spectrum of compound <b>4</b> .....                                         | S40 |
| <b>Figure S38.</b> HRESI-MS spectrum of compound <b>4</b> .....                                    | S41 |
| <b>Figure S39.</b> ESI-MS/MS spectrum of compound <b>4</b> .....                                   | S42 |
| <b>Figure S40.</b> Marfey's analysis of compound <b>4</b> .....                                    | S43 |
| <b>Figure S41.</b> $^1\text{H}$ NMR spectrum of compound <b>5</b> (DMSO- $d_6$ , 700 MHz) .....    | S44 |
| <b>Figure S42.</b> $^{13}\text{C}$ NMR spectrum of compound <b>5</b> (DMSO- $d_6$ , 175 MHz) ..... | S45 |
| <b>Figure S43.</b> COSY spectrum of compound <b>5</b> .....                                        | S46 |
| <b>Figure S44.</b> HSQC spectrum of compound <b>5</b> .....                                        | S47 |
| <b>Figure S45.</b> HMBC spectrum of compound <b>5</b> .....                                        | S48 |
| <b>Figure S46.</b> ROESY spectrum of compound <b>5</b> .....                                       | S49 |
| <b>Figure S47.</b> ECD spectrum of compound <b>5</b> .....                                         | S50 |
| <b>Figure S48.</b> HRESI-MS spectrum of compound <b>5</b> .....                                    | S51 |
| <b>Figure S49.</b> ESI-MS/MS spectrum of compound <b>5</b> .....                                   | S52 |
| <b>Figure S50.</b> Marfey's analysis of compound <b>5</b> .....                                    | S53 |

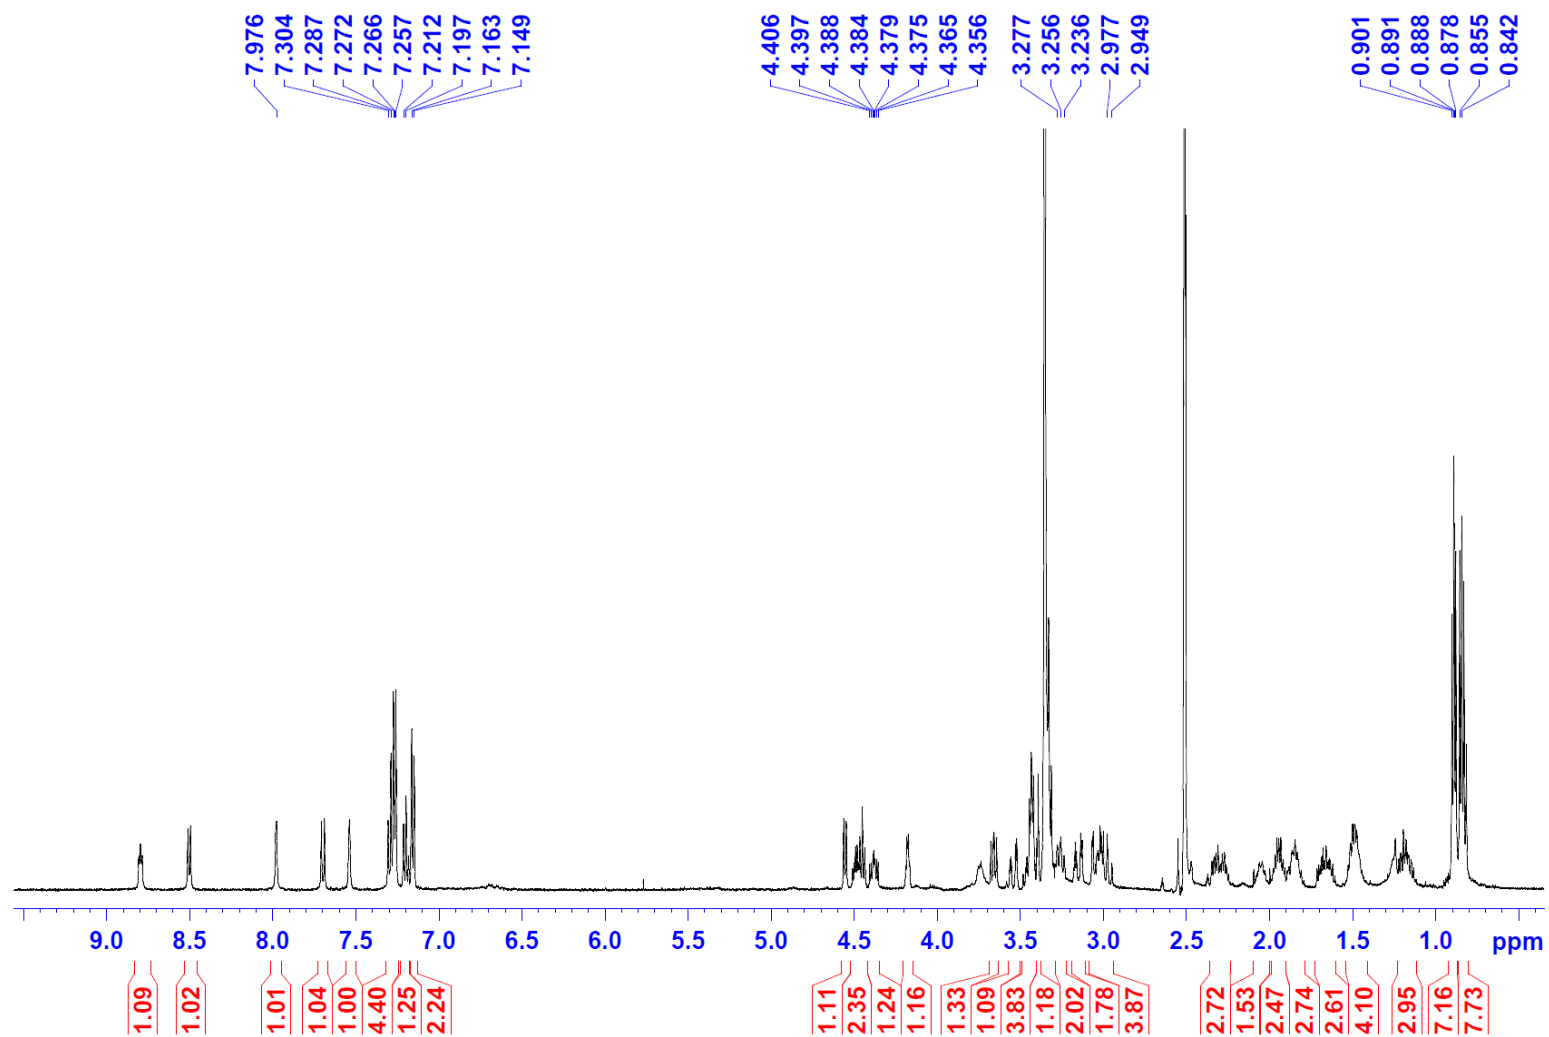

**Figure S1.** <sup>1</sup>H NMR spectrum of compound 1 (DMSO-*d*<sub>6</sub>, 700 MHz)

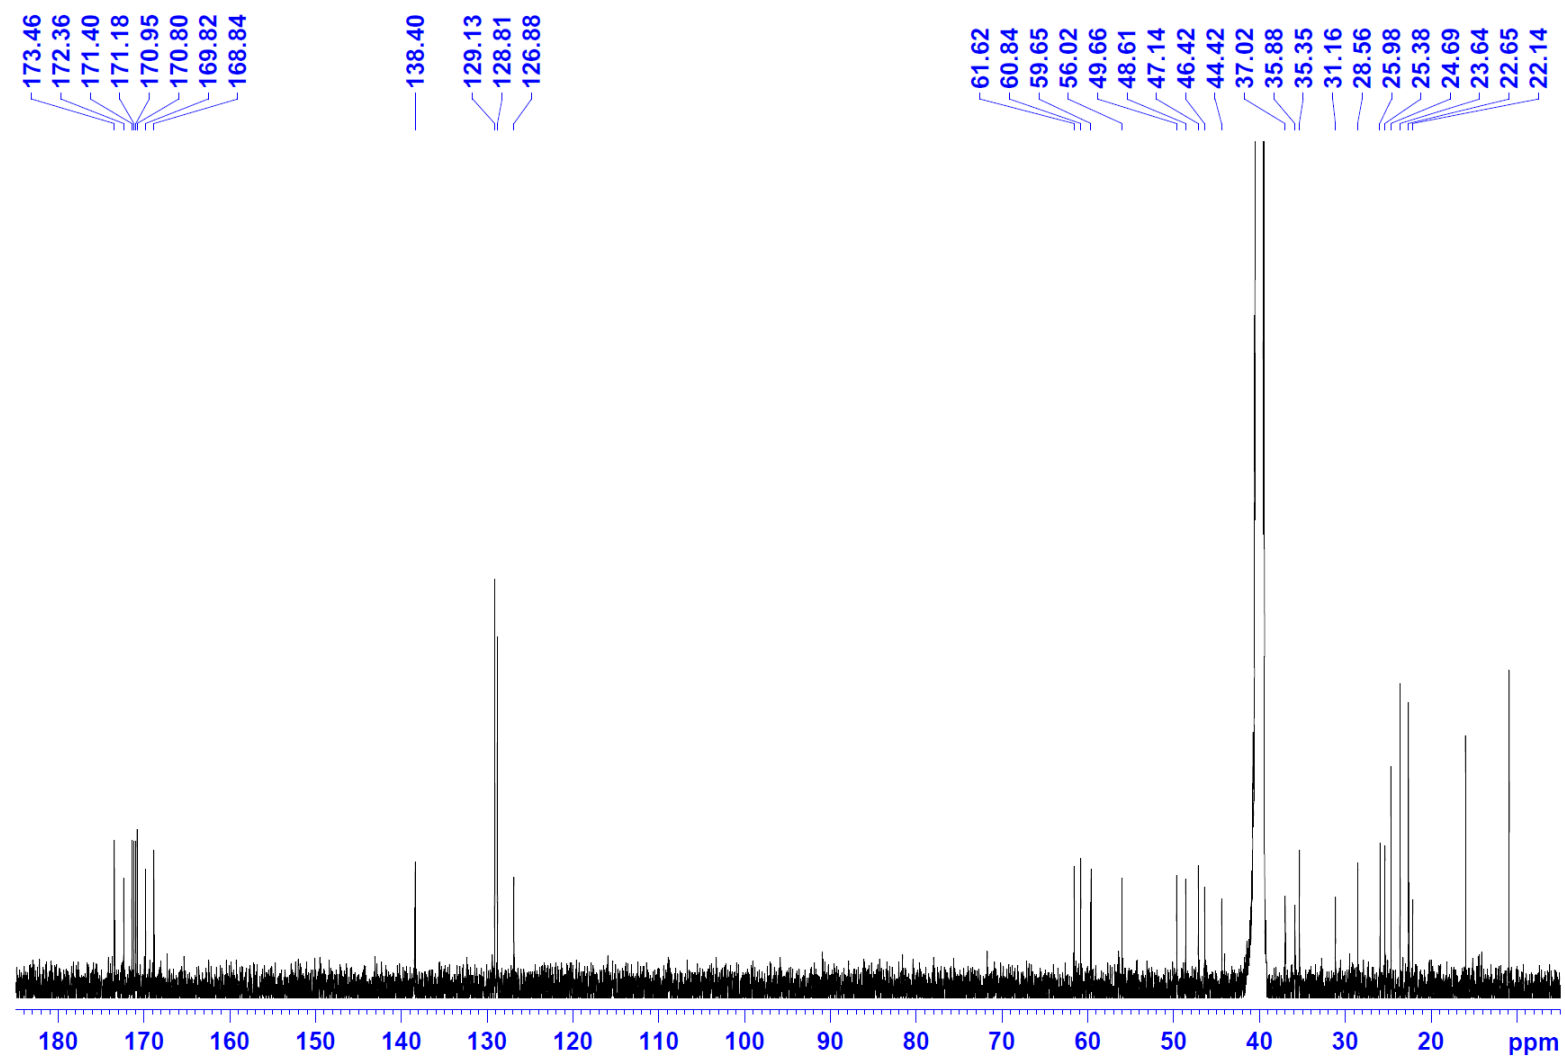

**Figure S2.** <sup>13</sup>C NMR spectrum of compound **1** (DMSO-*d*<sub>6</sub>, 175 MHz)

COSY of DSC141 in DMSO

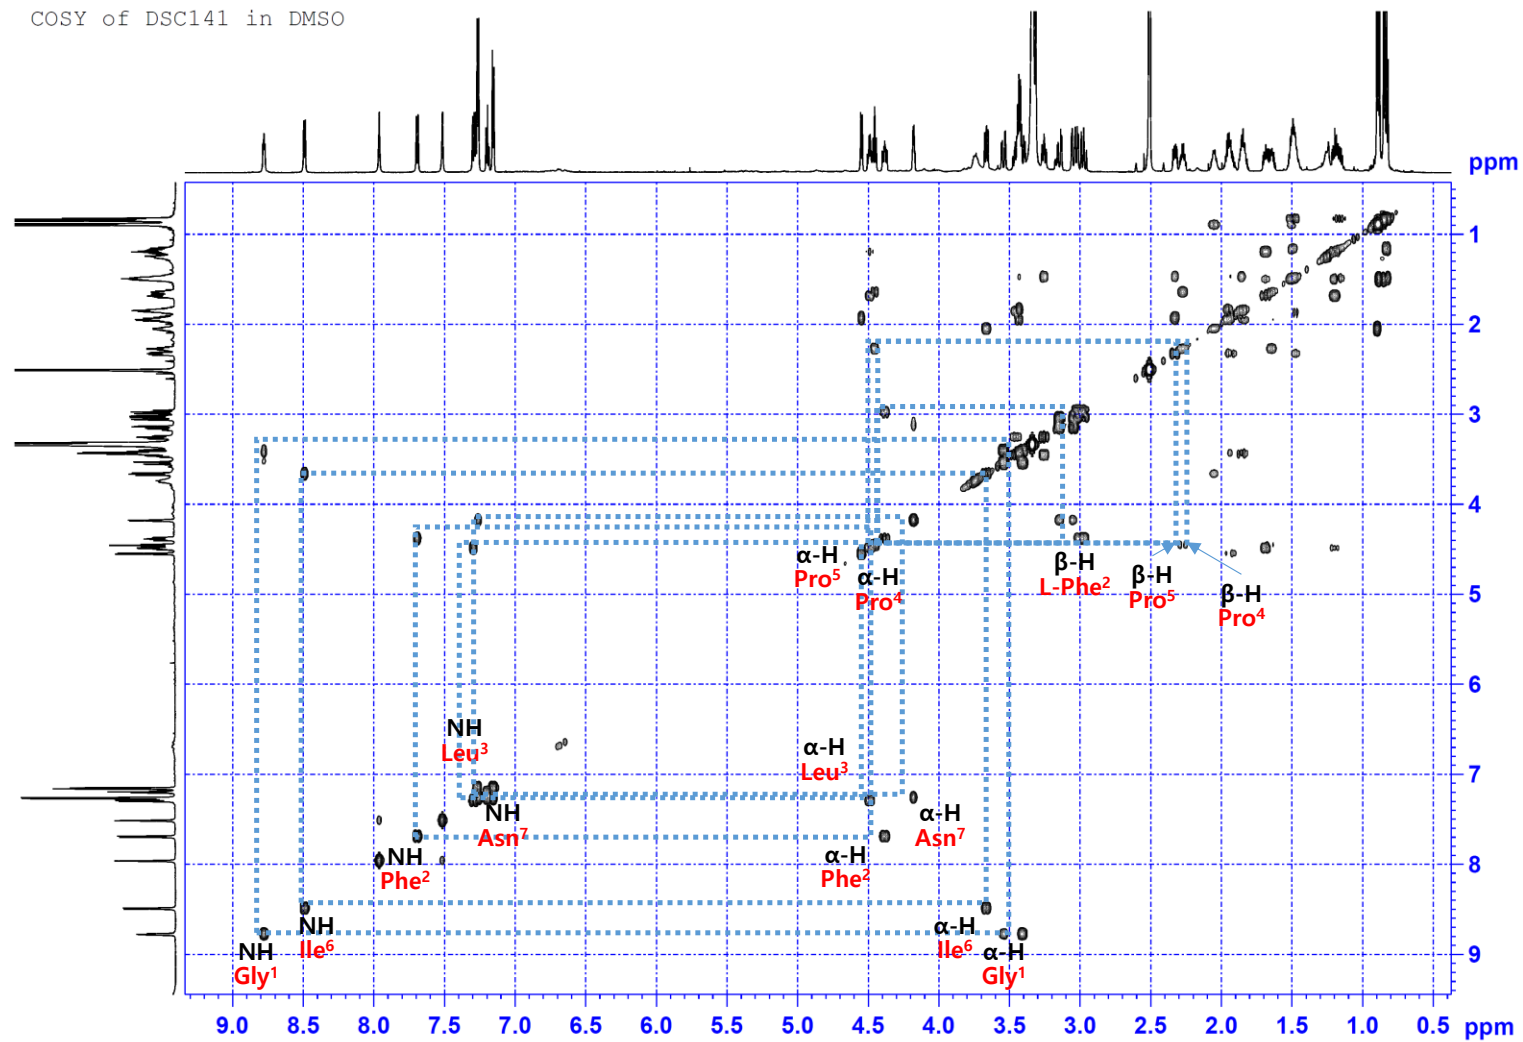

Figure S3. COSY spectrum of compound 1

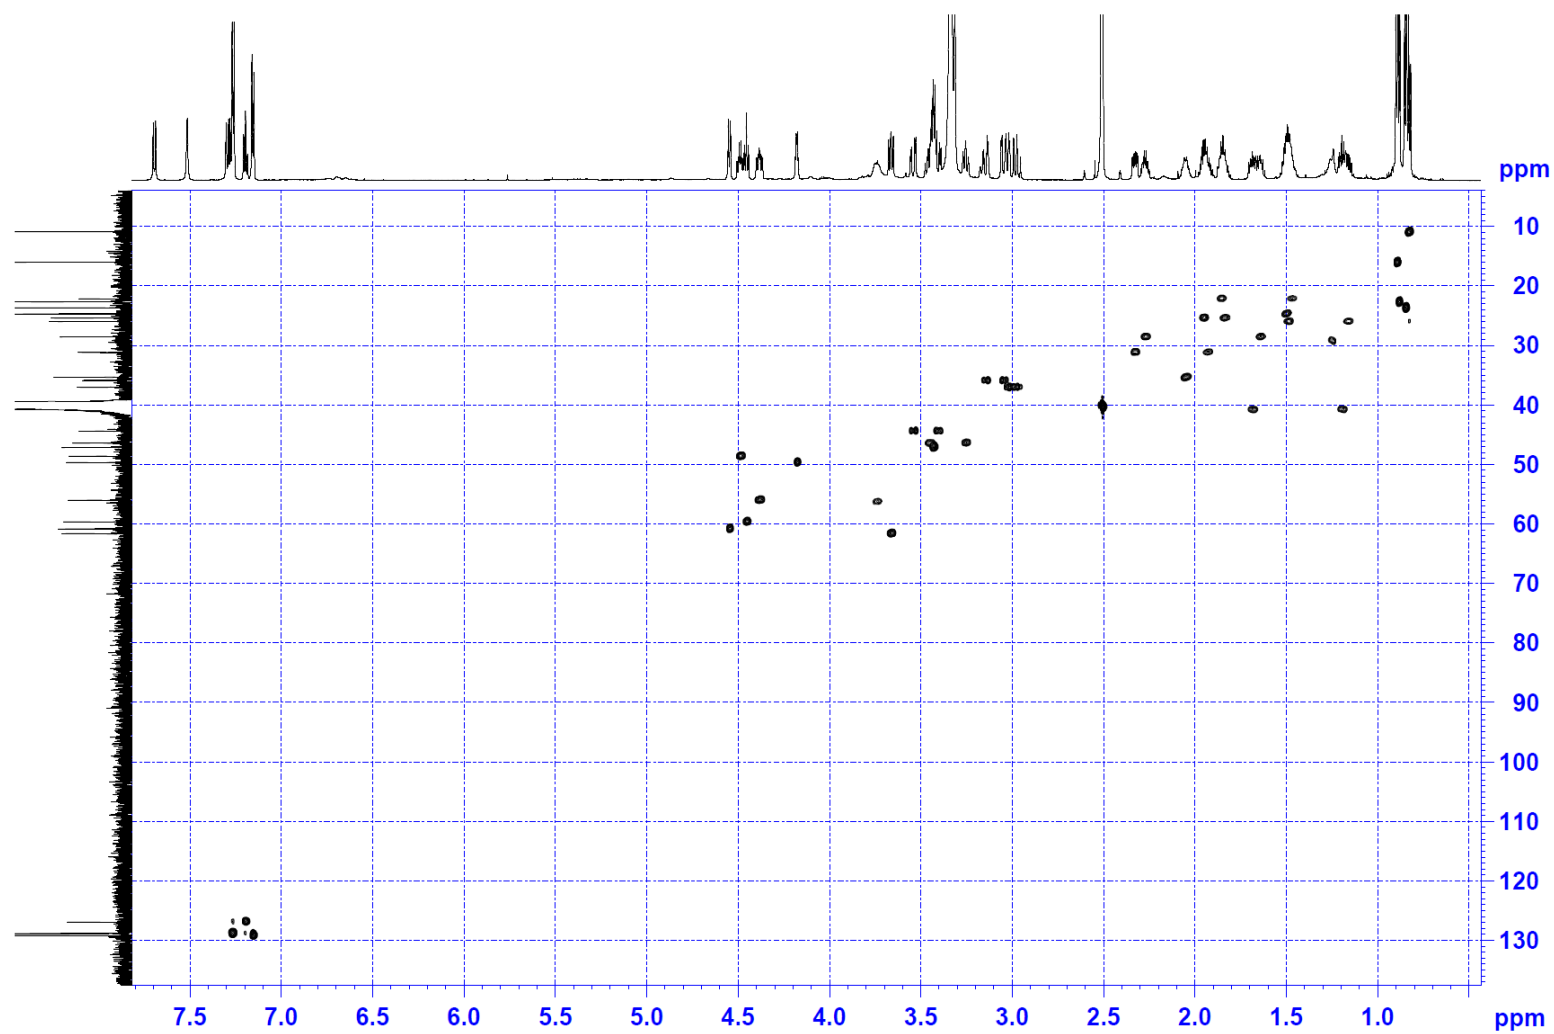

**Figure S4.** HSQC spectrum of compound **1**

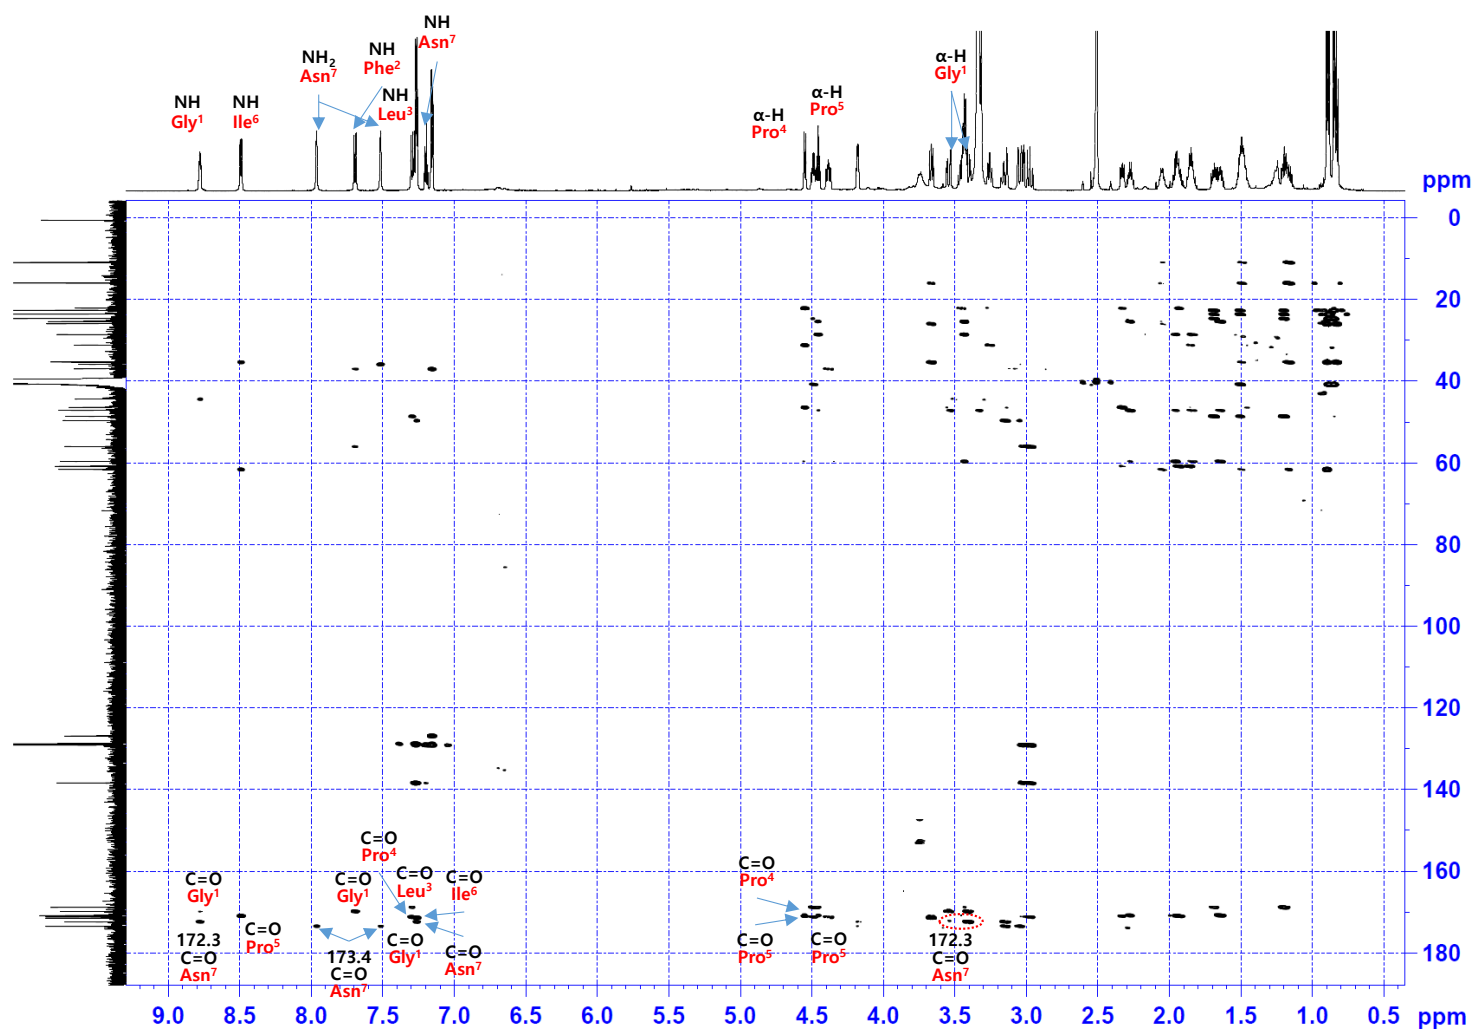

Figure S5. HMBC spectrum of compound 1



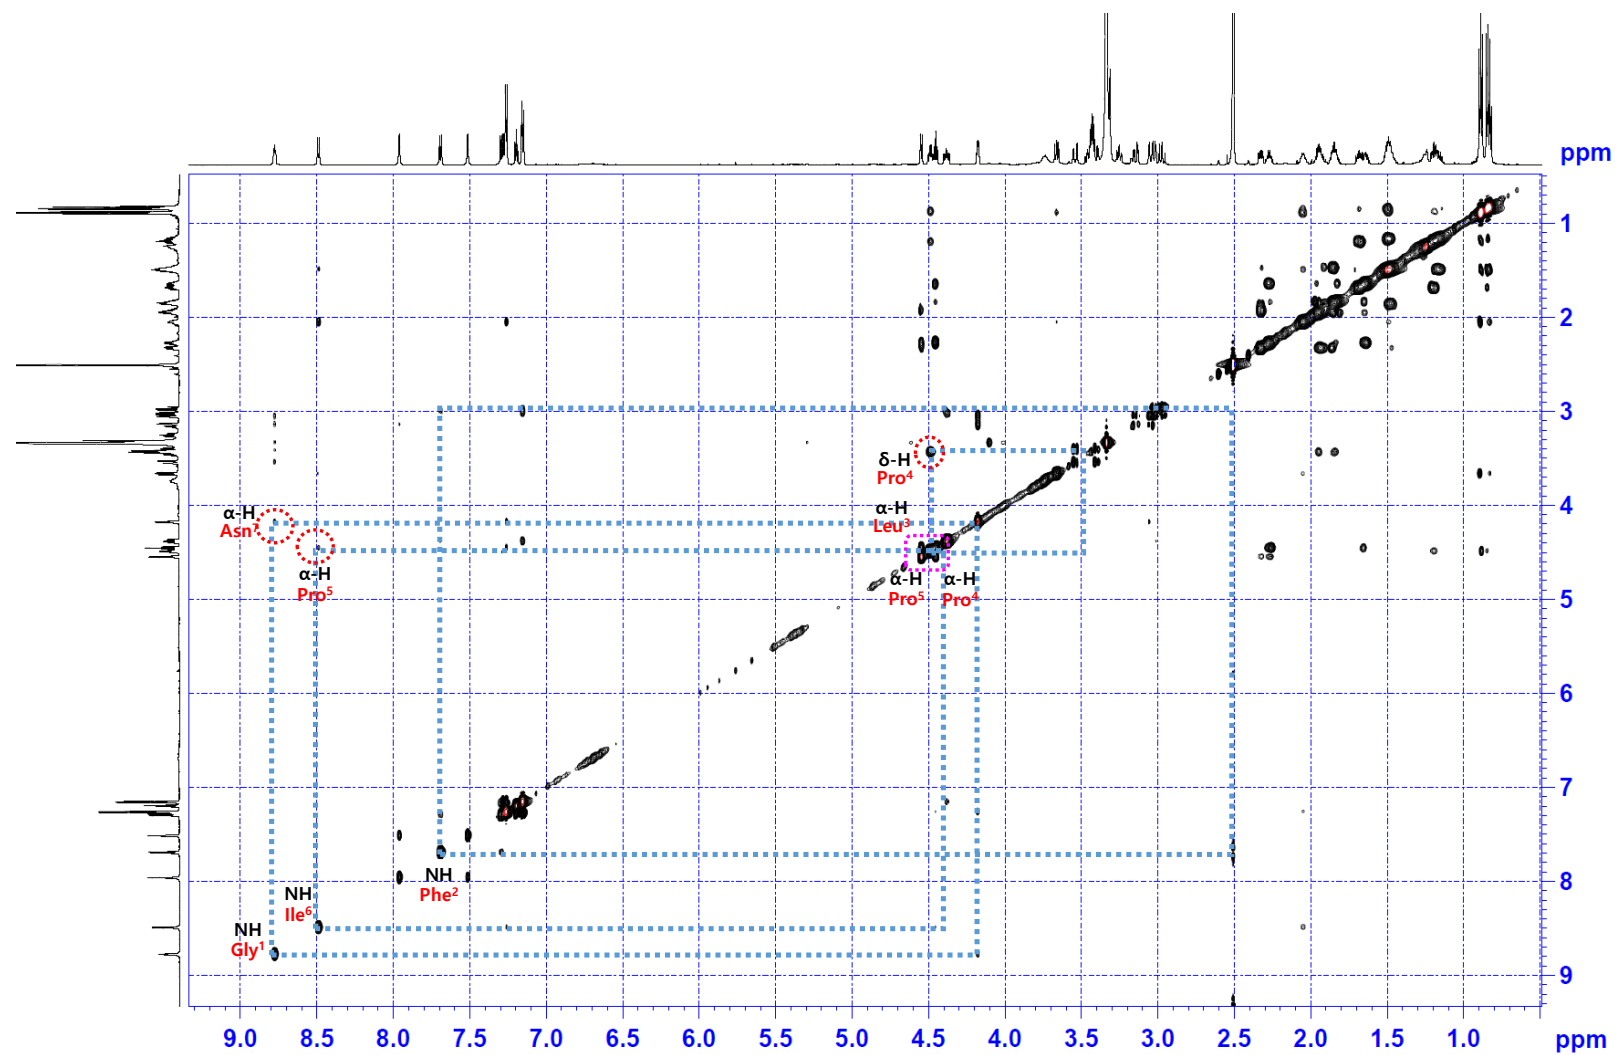

Figure S6. ROESY spectrum of compound 1

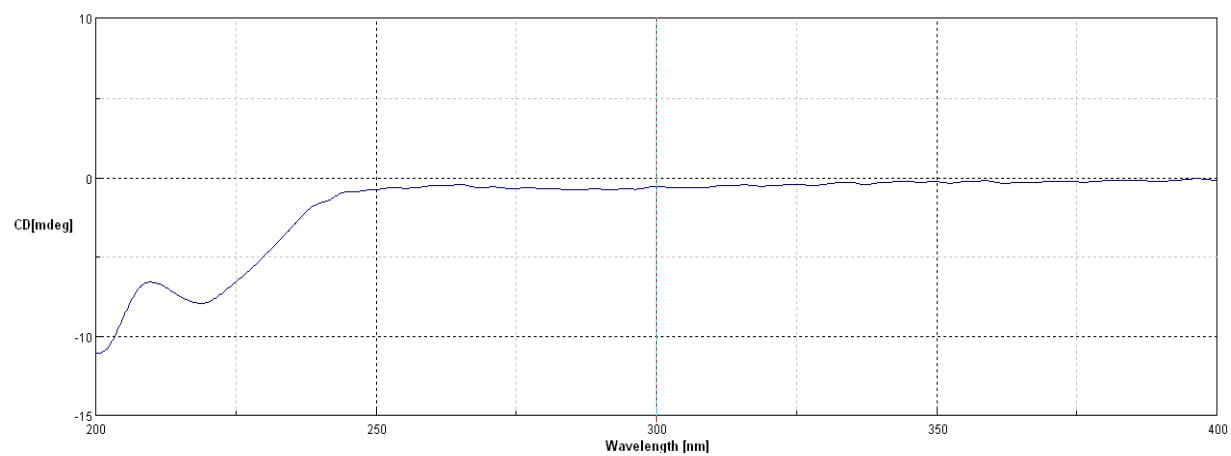

**Figure S7.** ECD spectrum of compound **1**

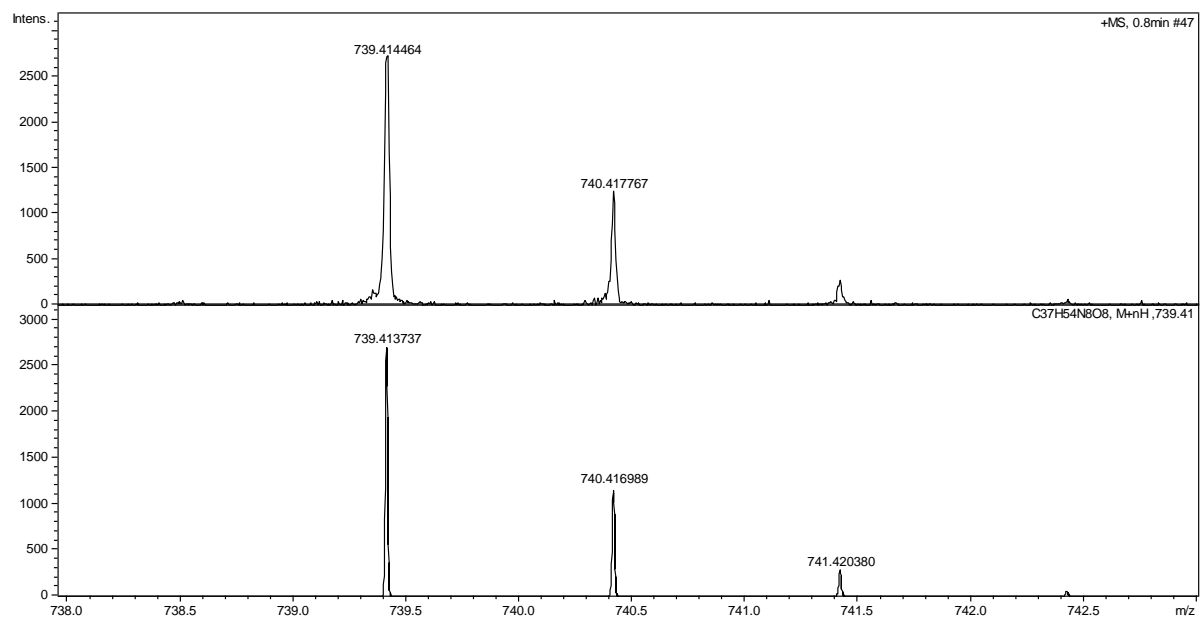

**Figure S8.** HRESI-MS spectrum of compound **1**

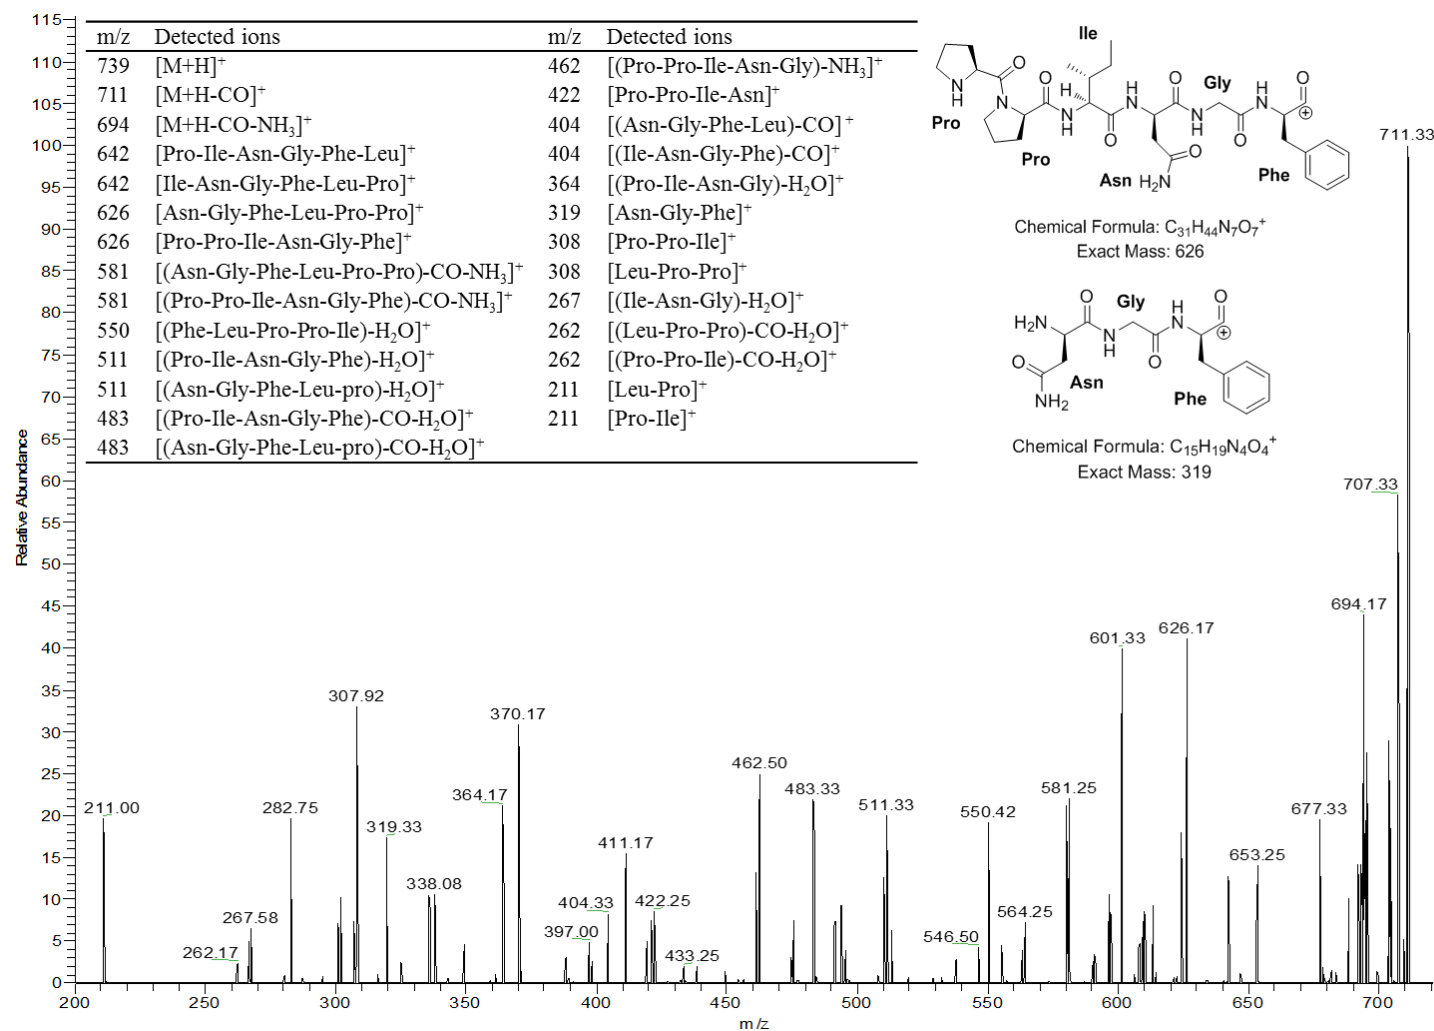

**Figure S9.** ESI-MS/MS spectrum of compound **1**

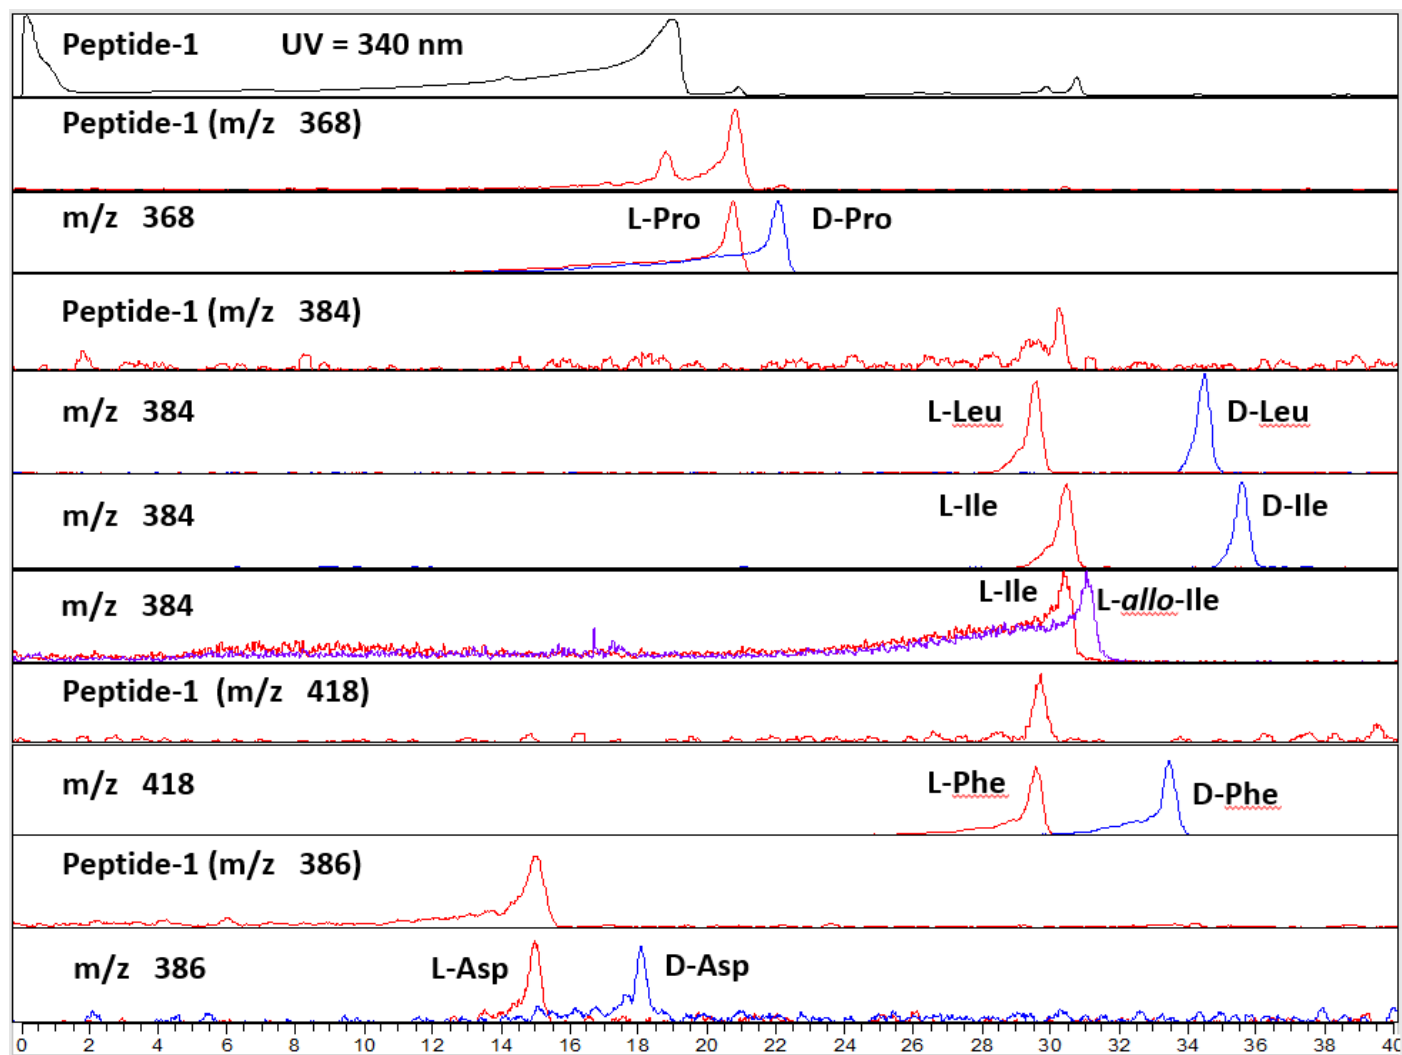

**Figure S10.** Marfey's analysis of compound 1

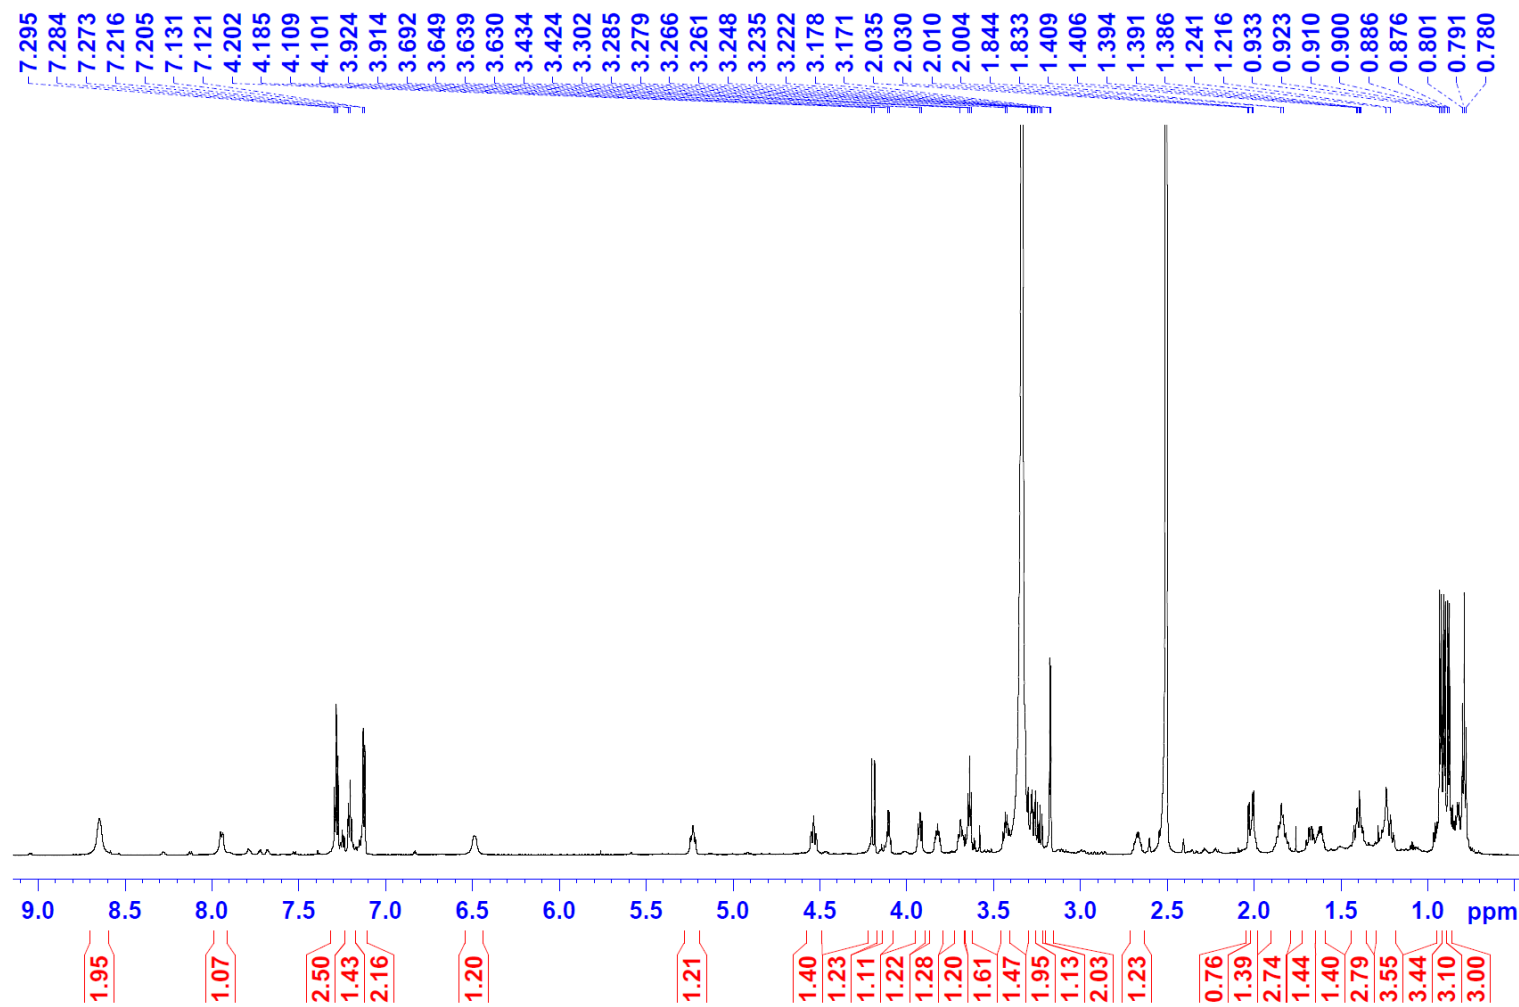

**Figure S11.** <sup>1</sup>H NMR spectrum of compound 2 (DMSO-*d*<sub>6</sub>, 700 MHz)

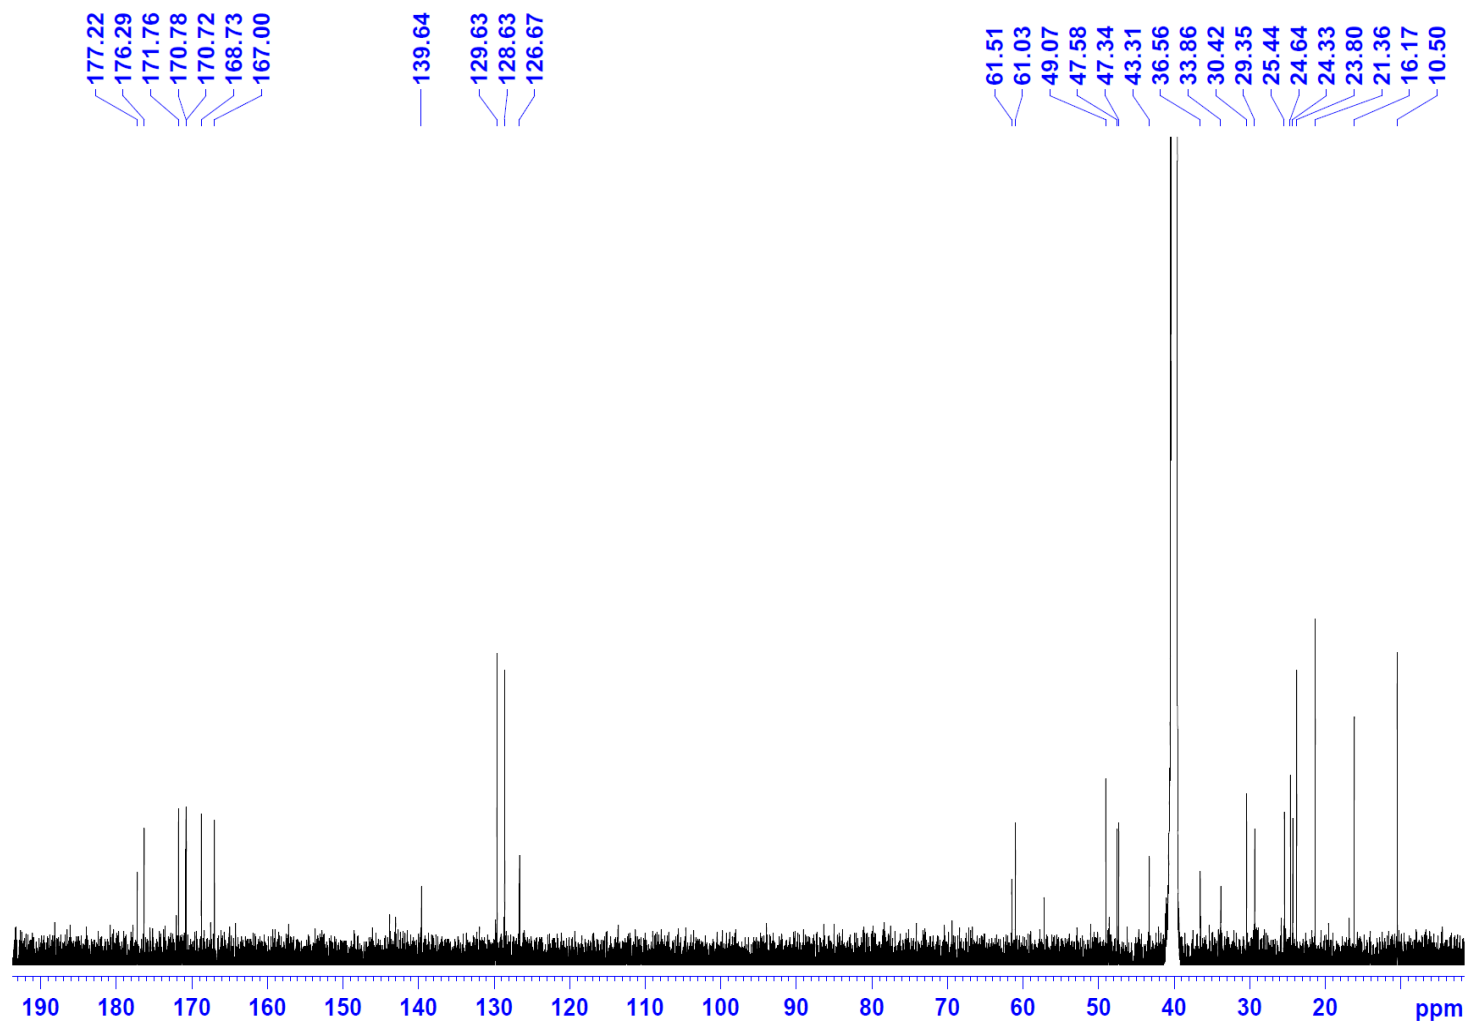

**Figure S12.** <sup>13</sup>C NMR spectrum of compound **2** (DMSO-*d*<sub>6</sub>, 175 MHz)

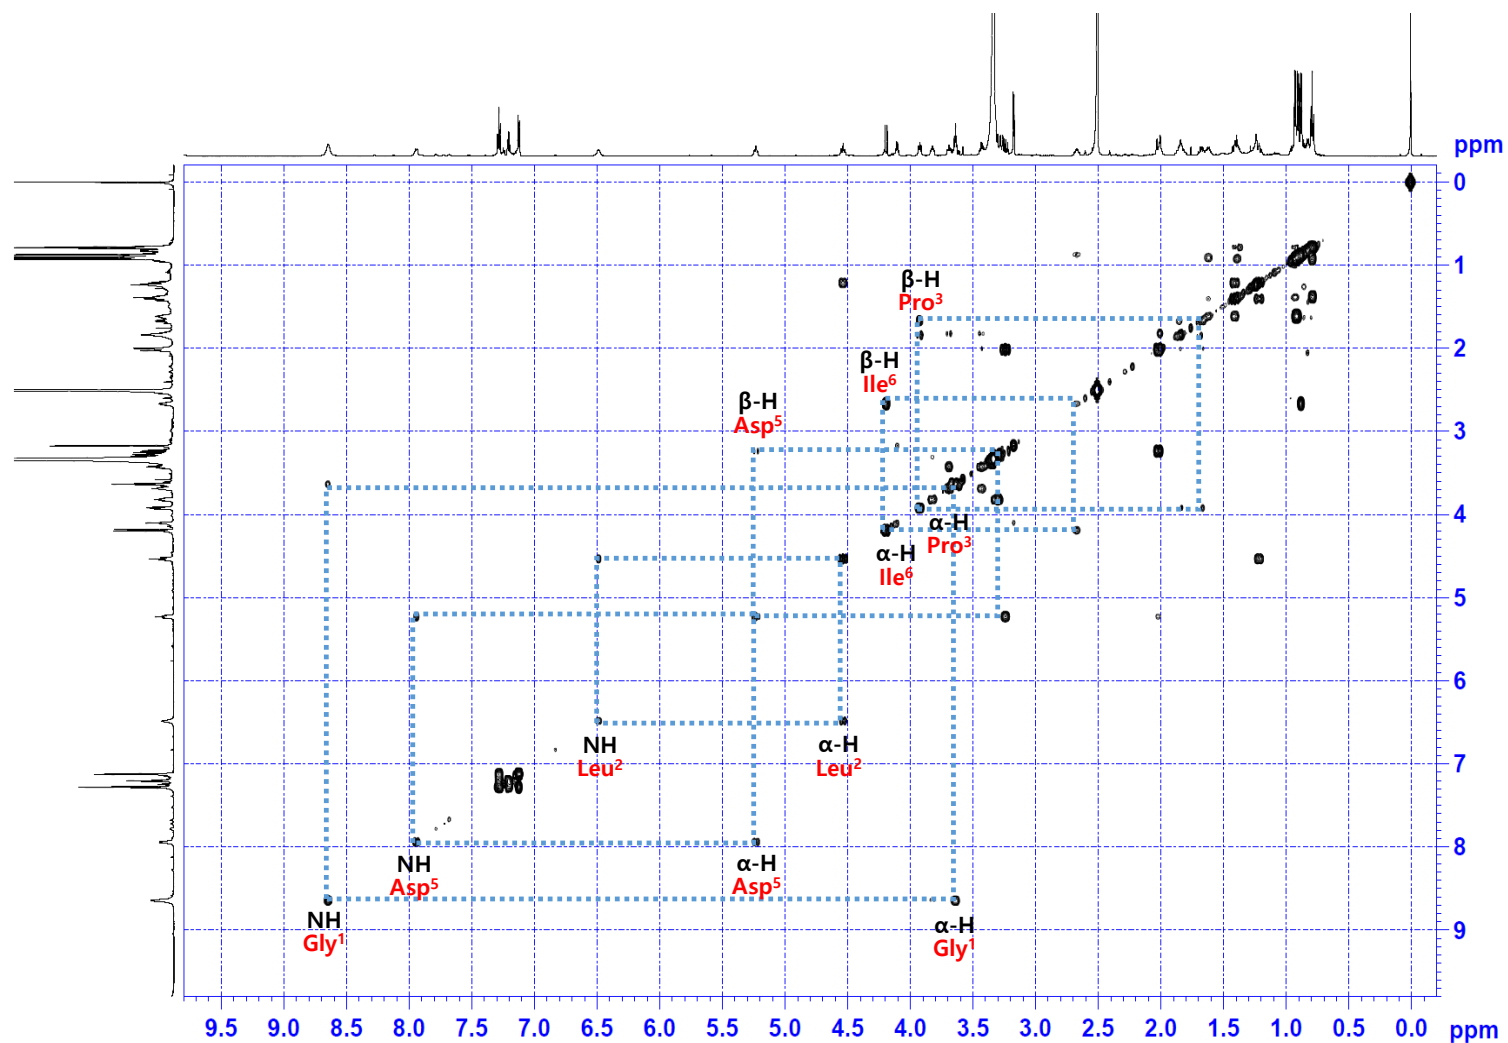

Figure S13. COSY spectrum of compound 2



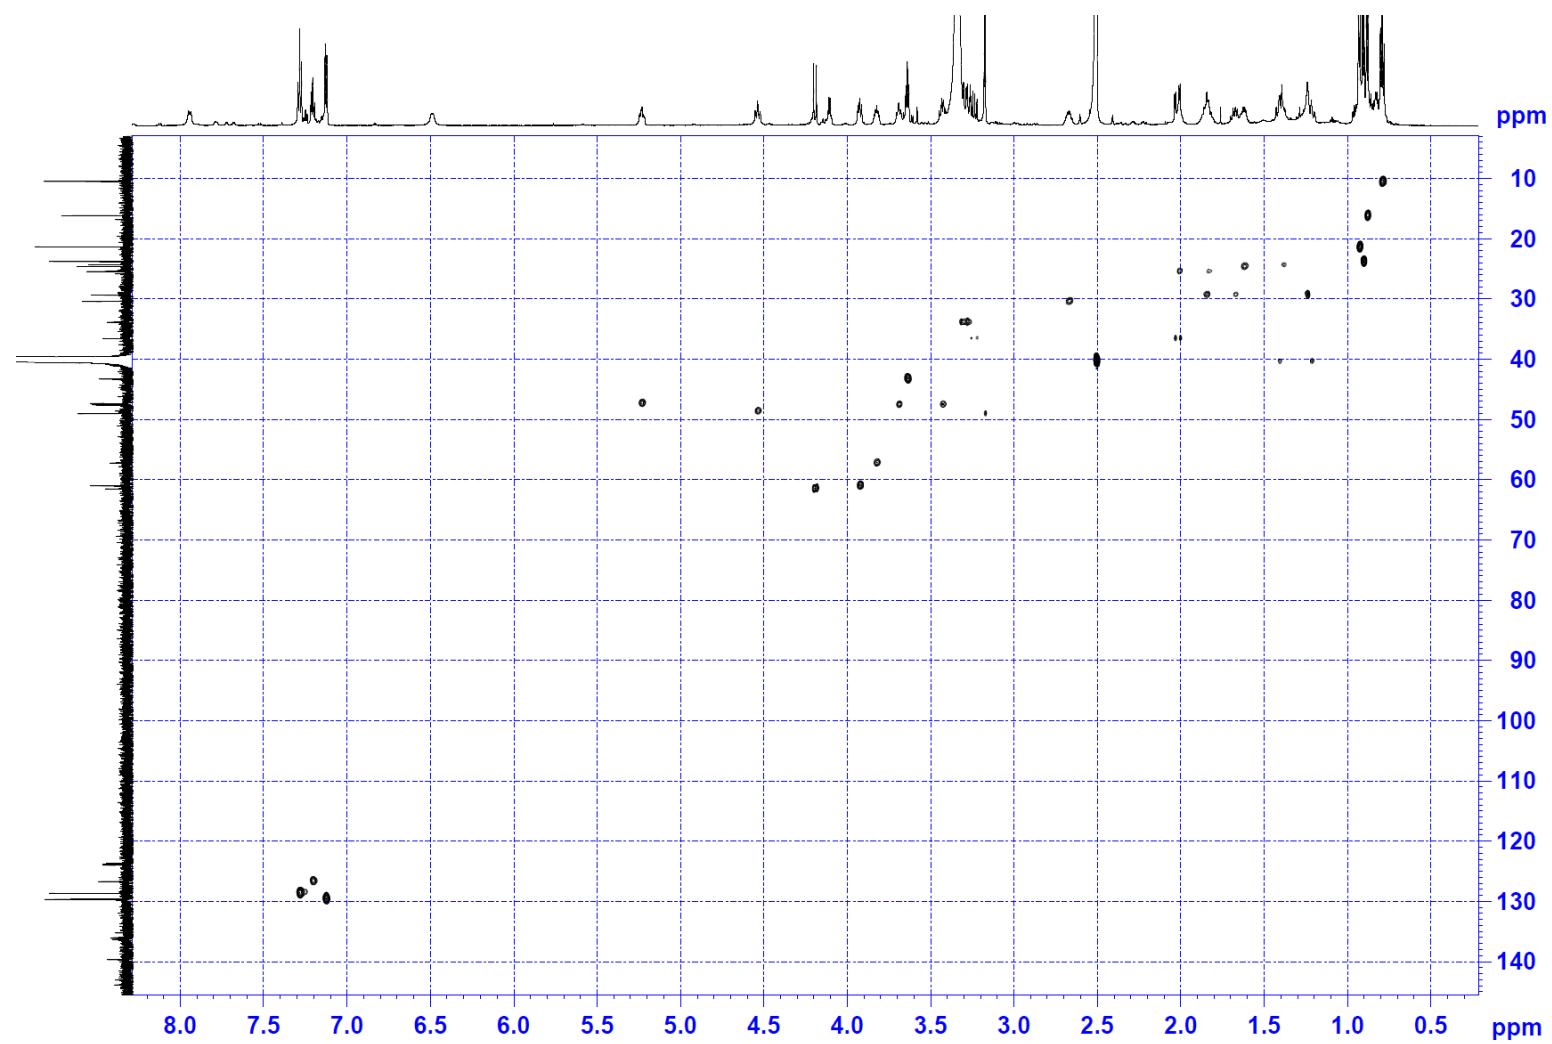

**Figure S14.** HSQC spectrum of compound 2

S17

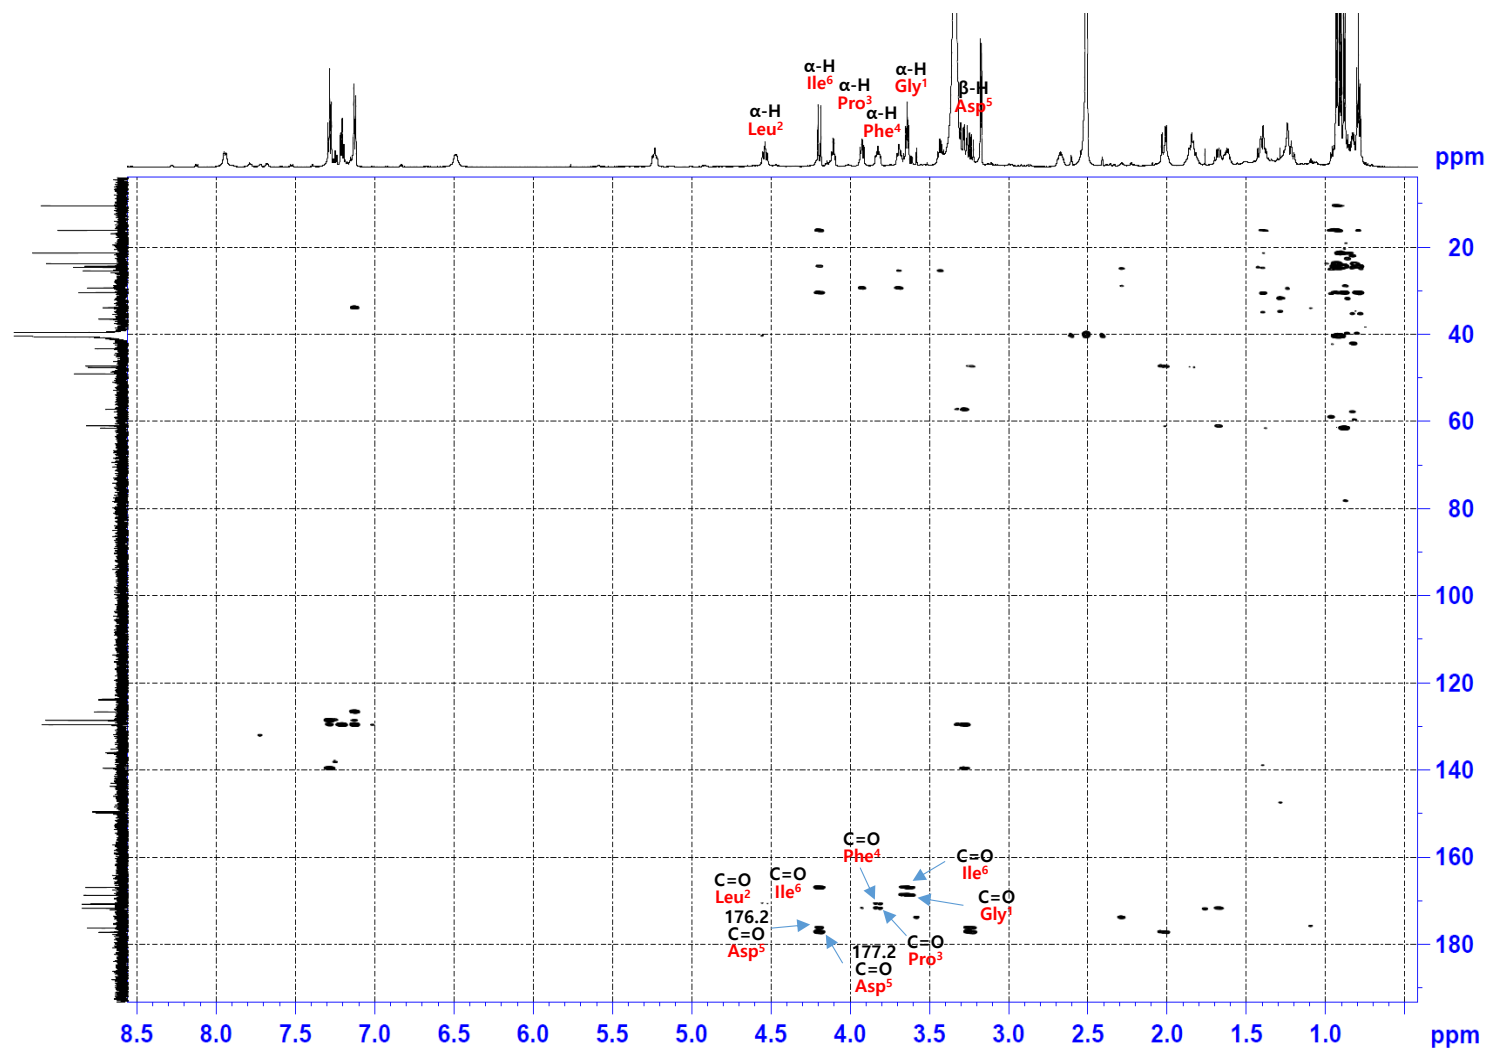

Figure S15. HMBC spectrum of compound 2  
S18

ROESY of DSC741 in DMSO

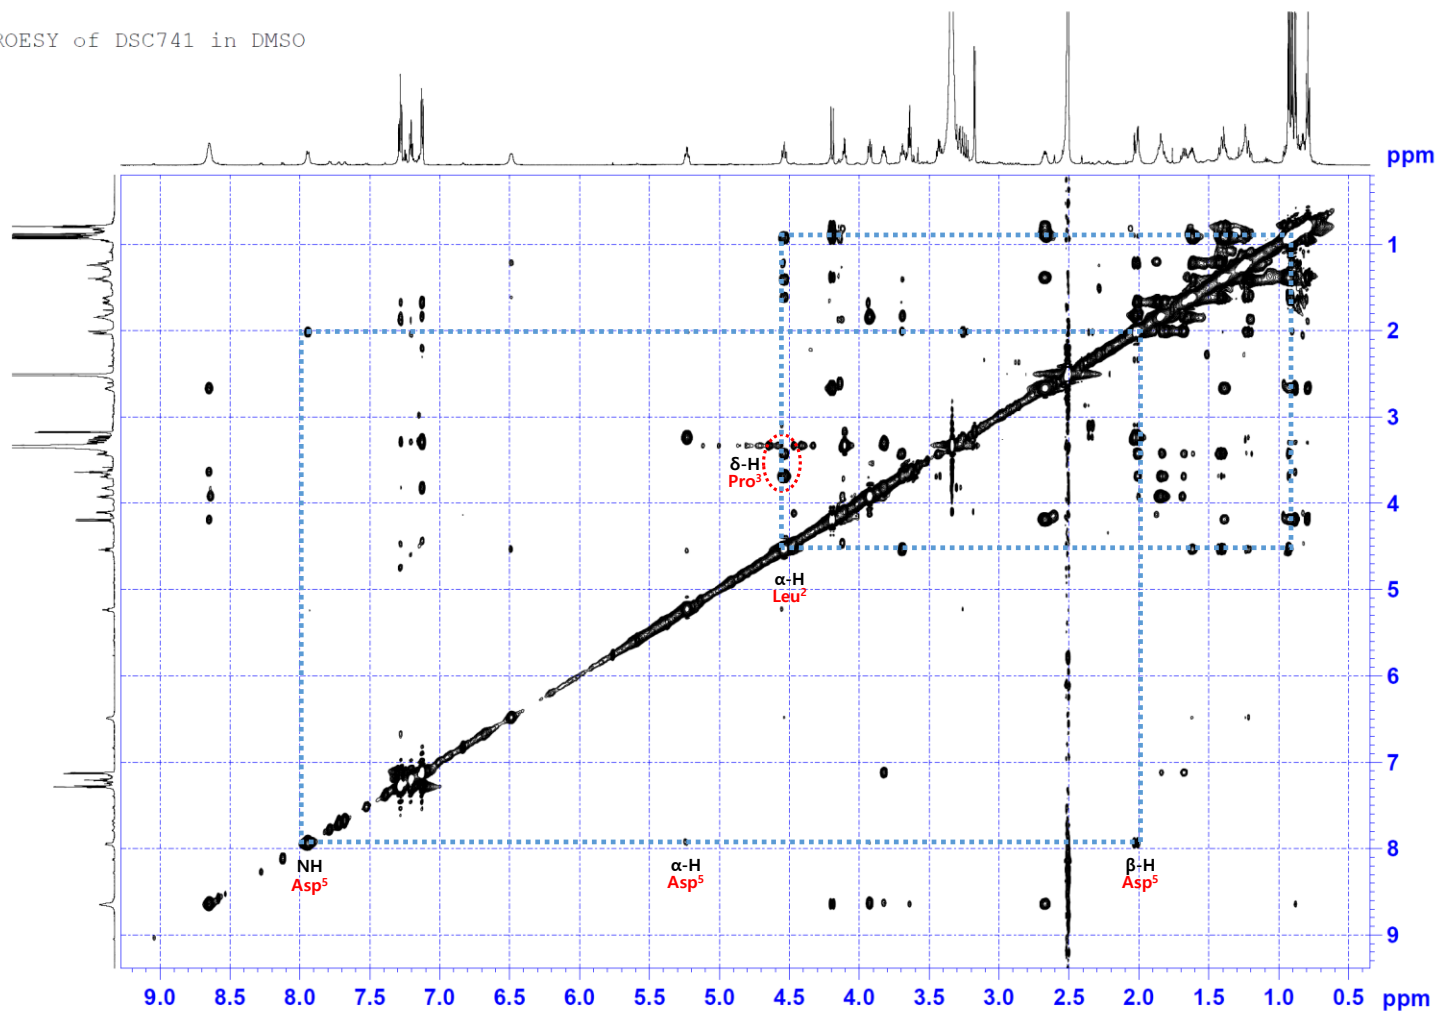

Figure S16. ROESY spectrum of compound 2

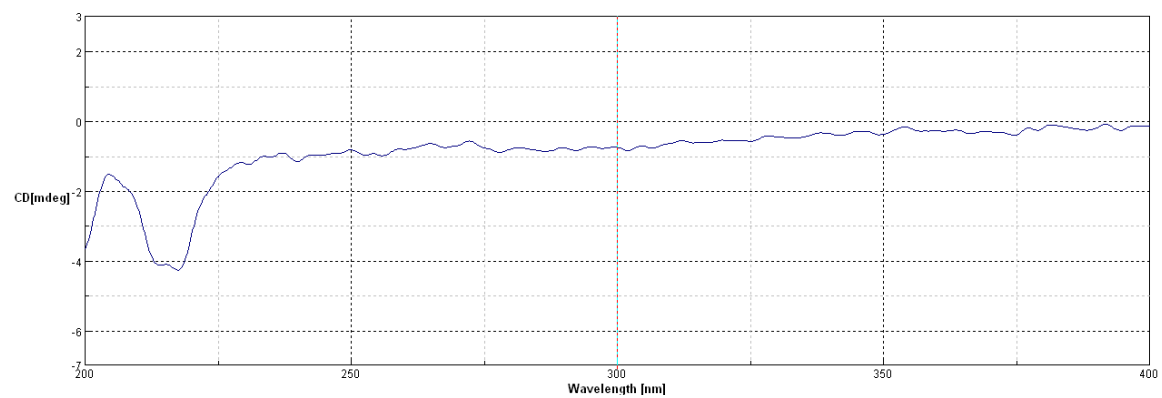

**Figure S17.** ECD spectrum of compound **2**

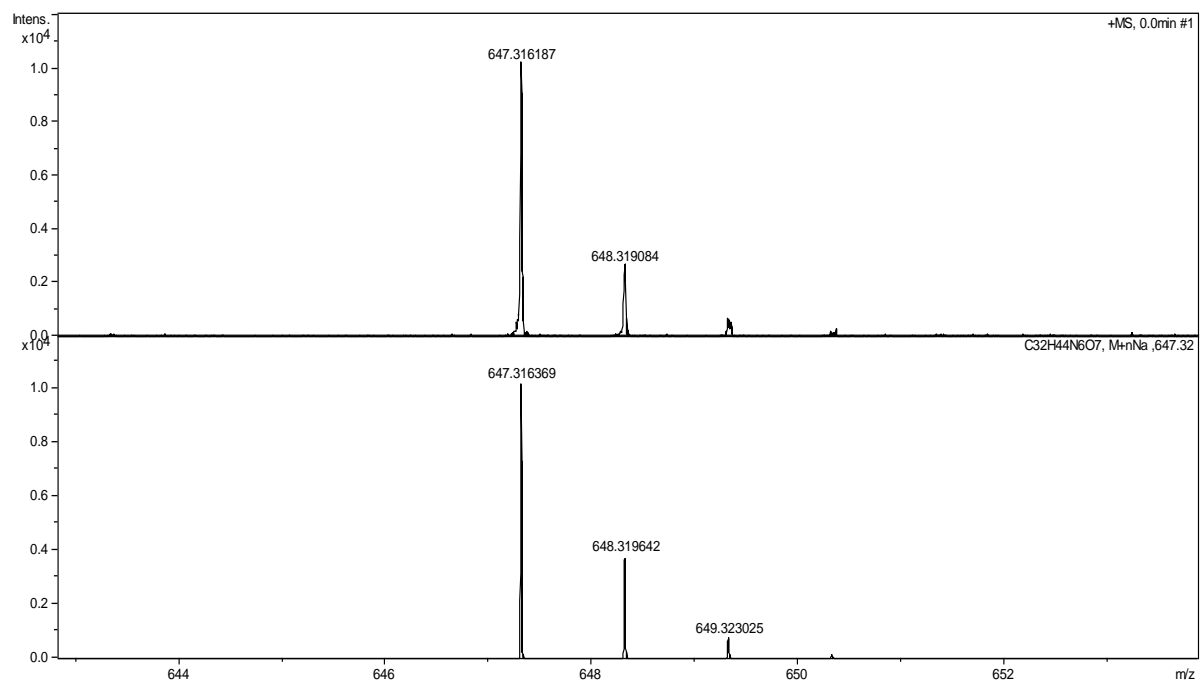

**Figure S18.** HRESI-MS spectrum of compound **2**

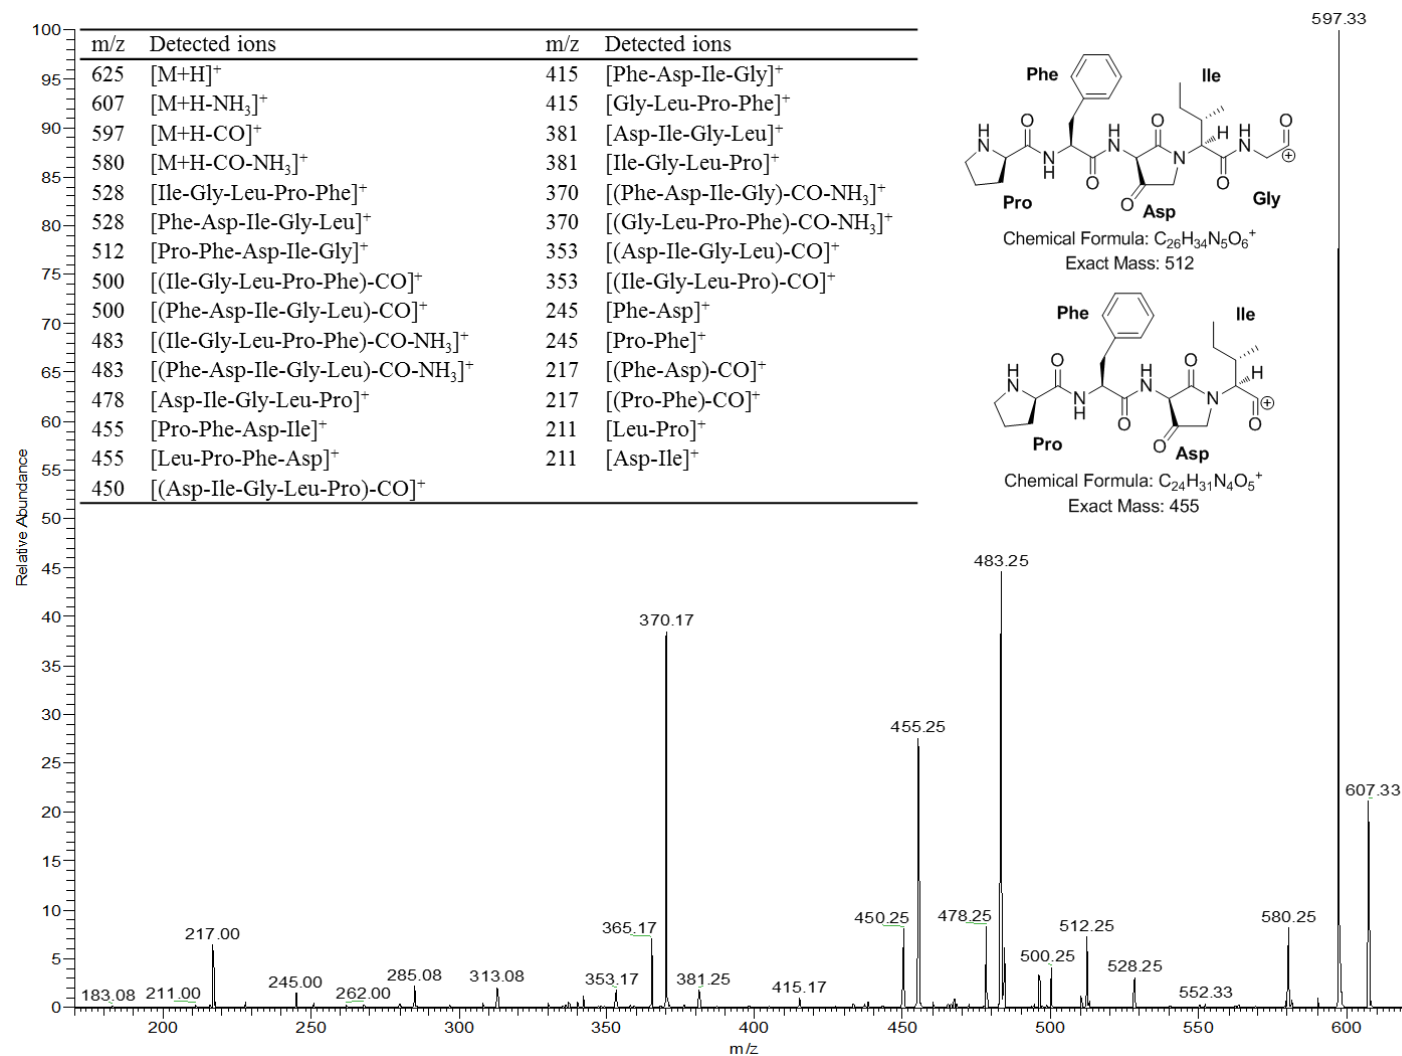

**Figure S19.** ESI-MS/MS spectrum of compound **2**

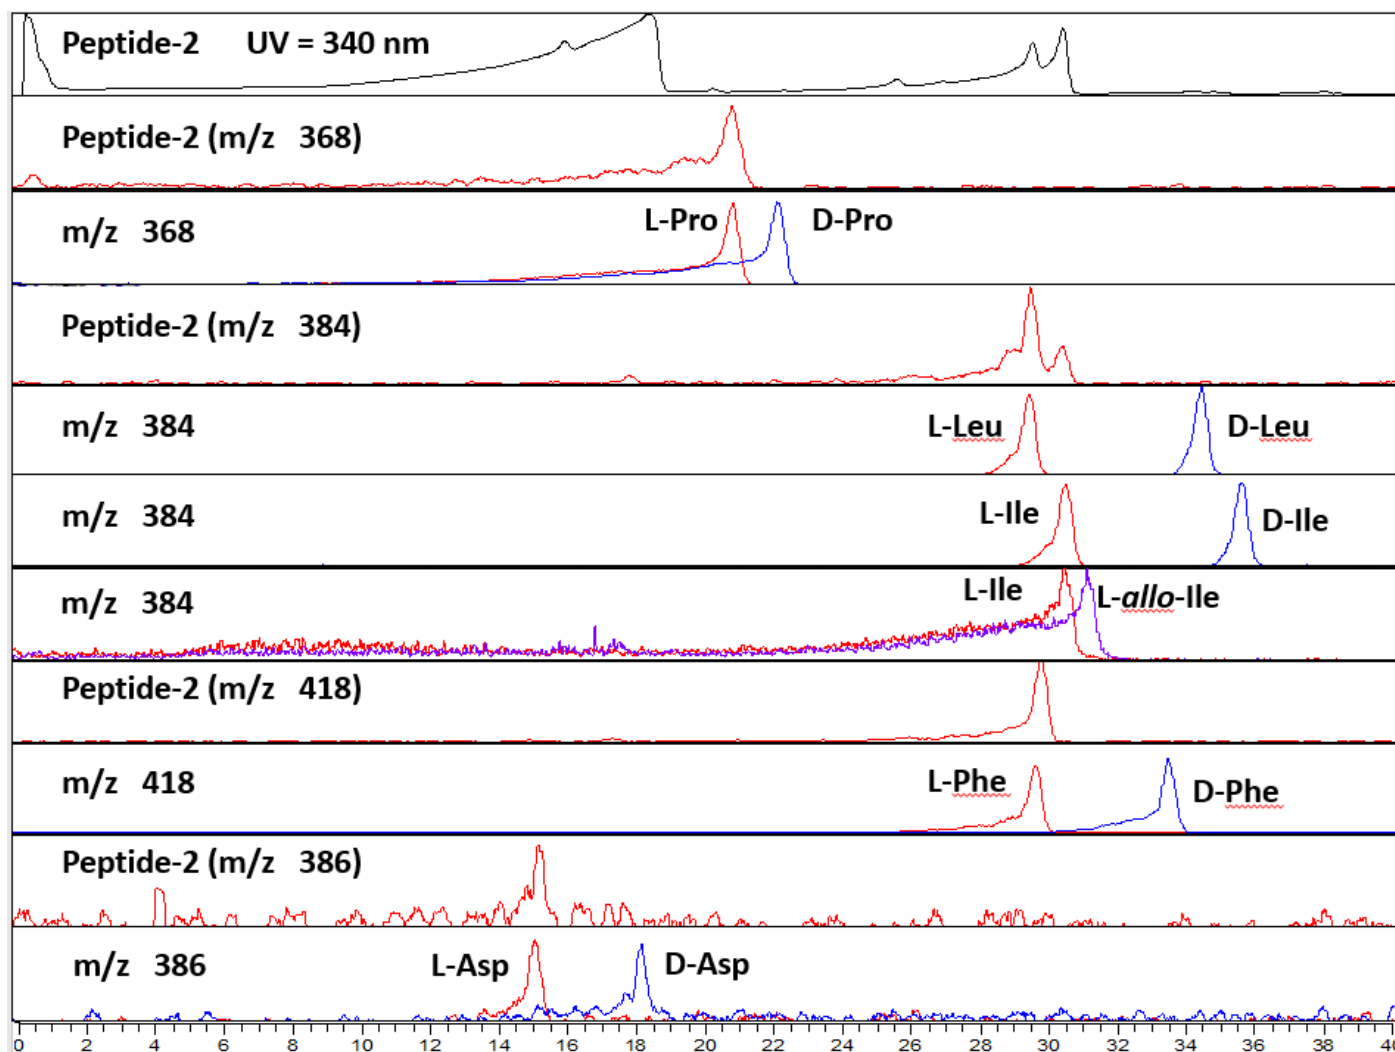

**Figure S20.** Marfey's analysis of compound 2

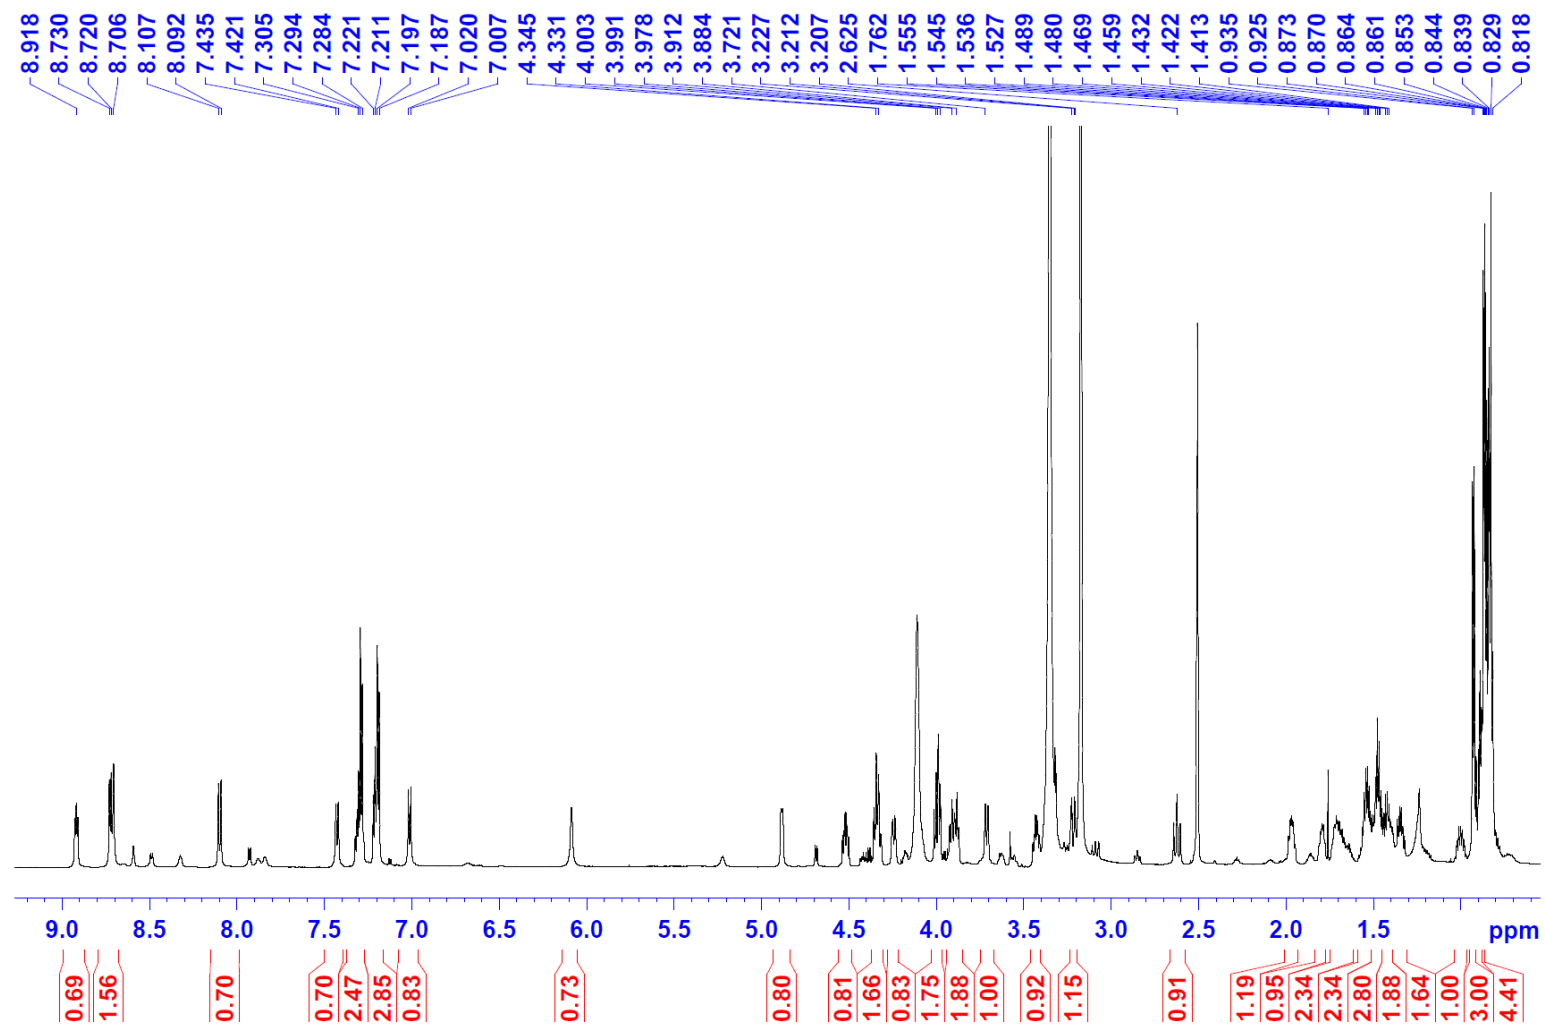

**Figure S21.**  $^1\text{H}$  NMR spectrum of compound **3** ( $\text{DMSO}-d_6$ , 700 MHz)



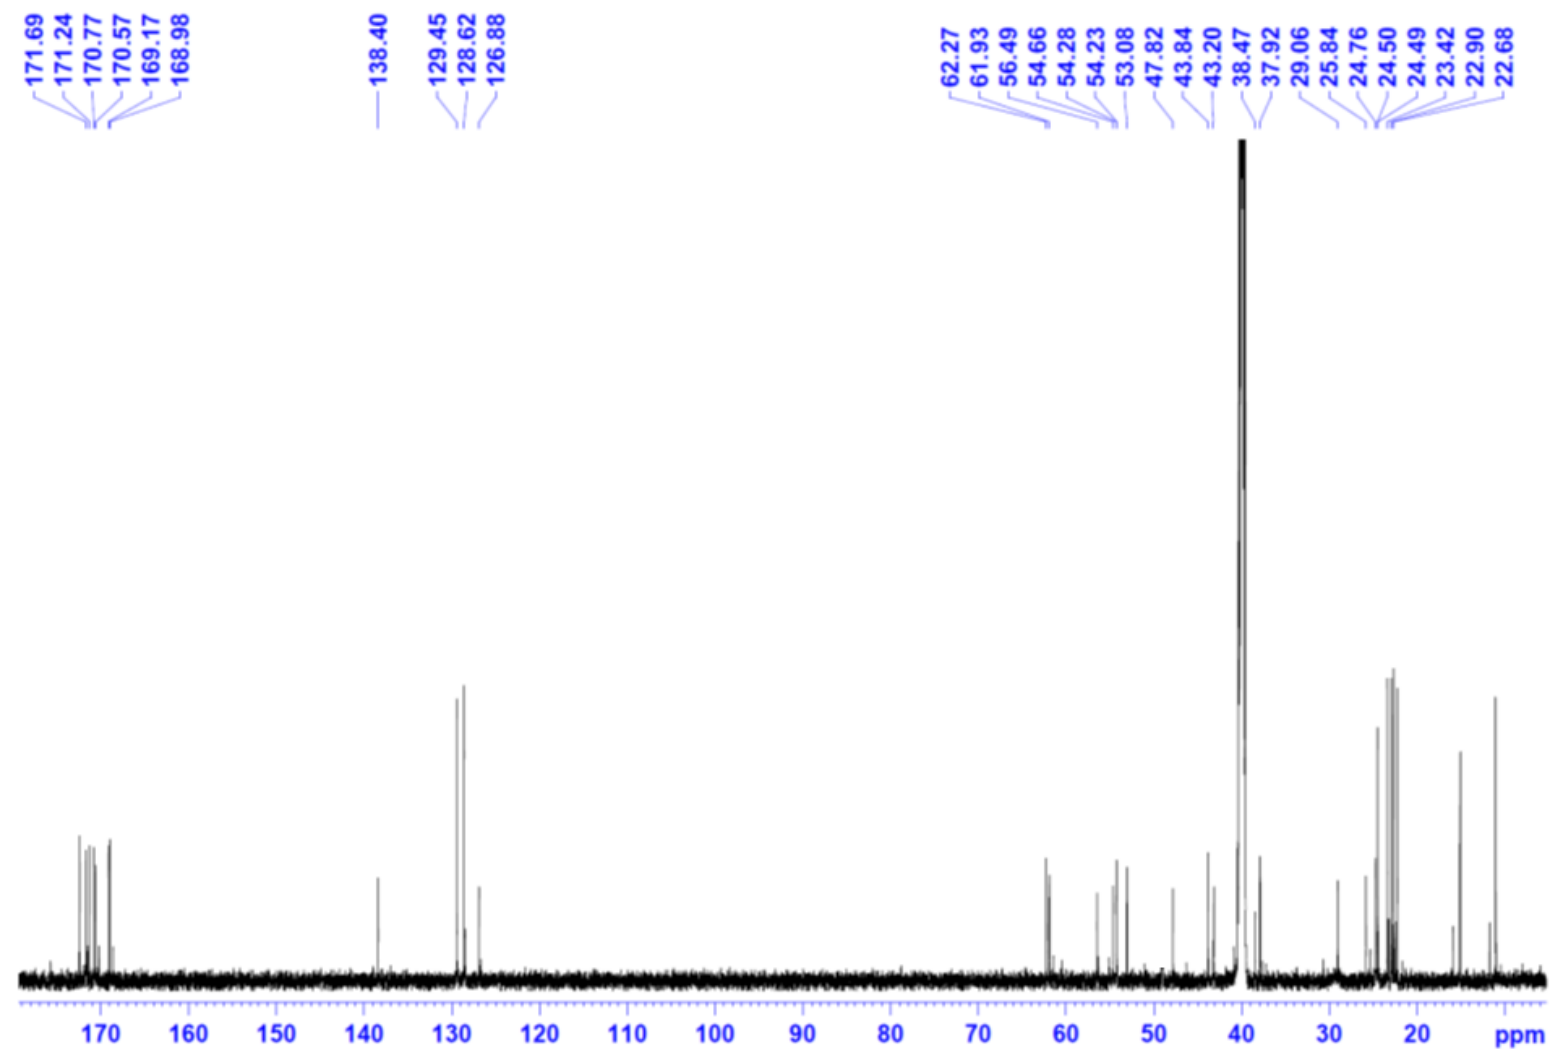

**Figure S22.** <sup>13</sup>C NMR spectrum of compound **3** (DMSO-*d*<sub>6</sub>, 175 MHz)

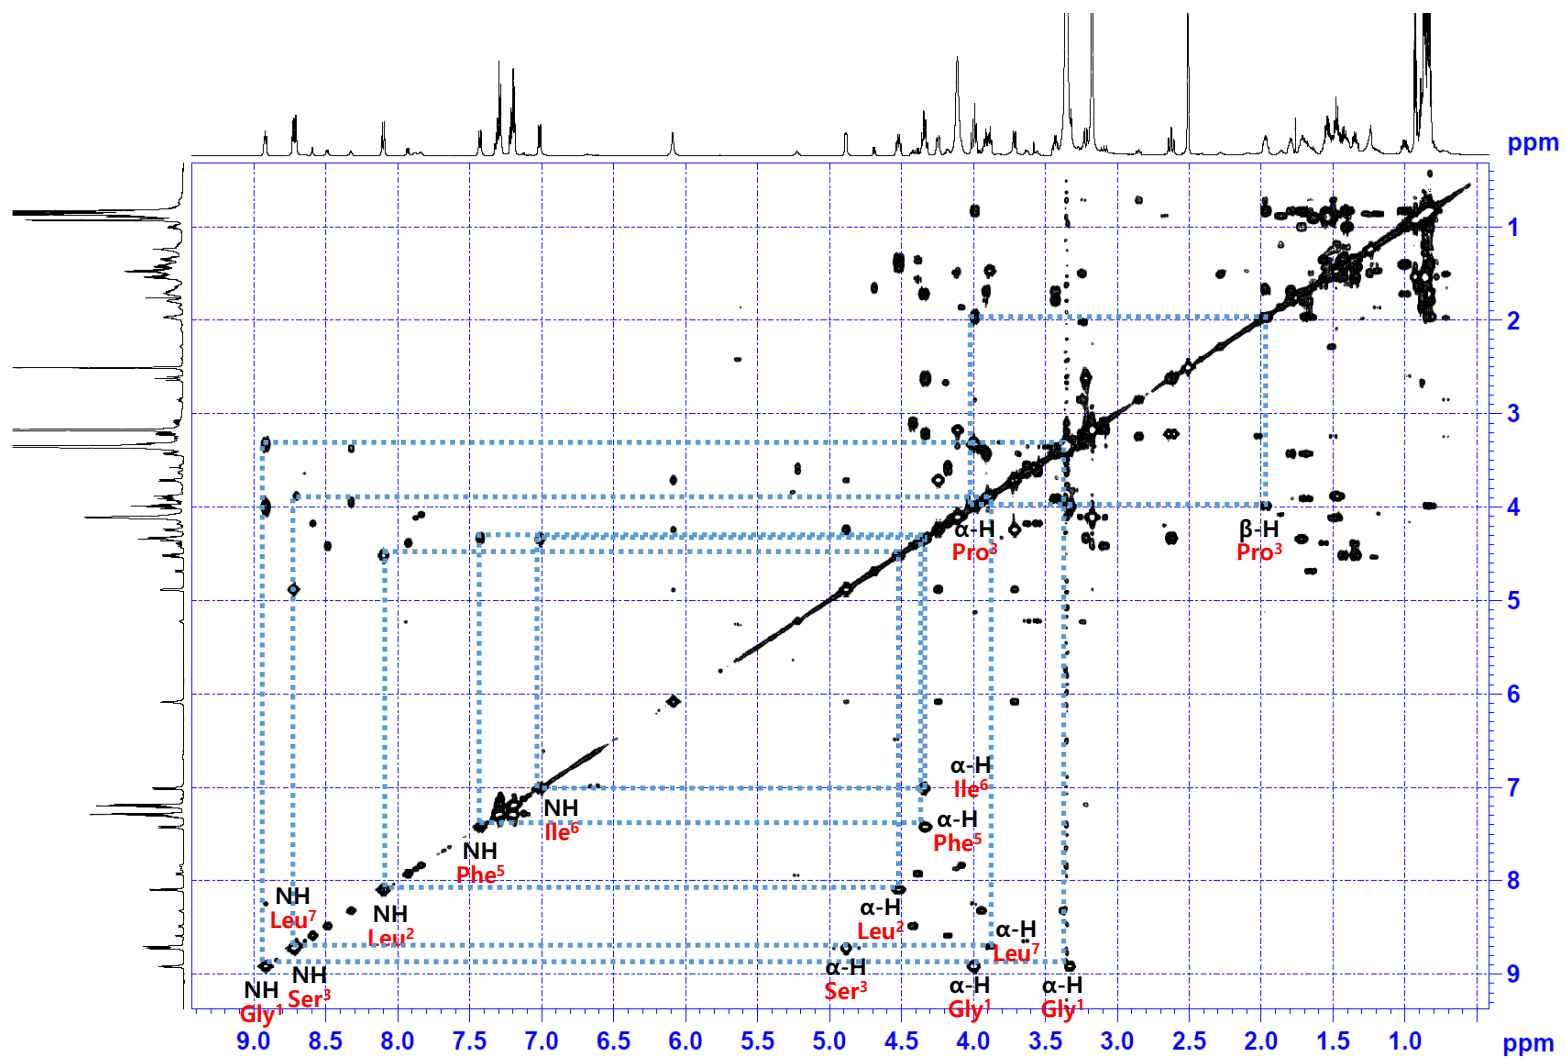

Figure S23. COSY spectrum of compound 3

S26

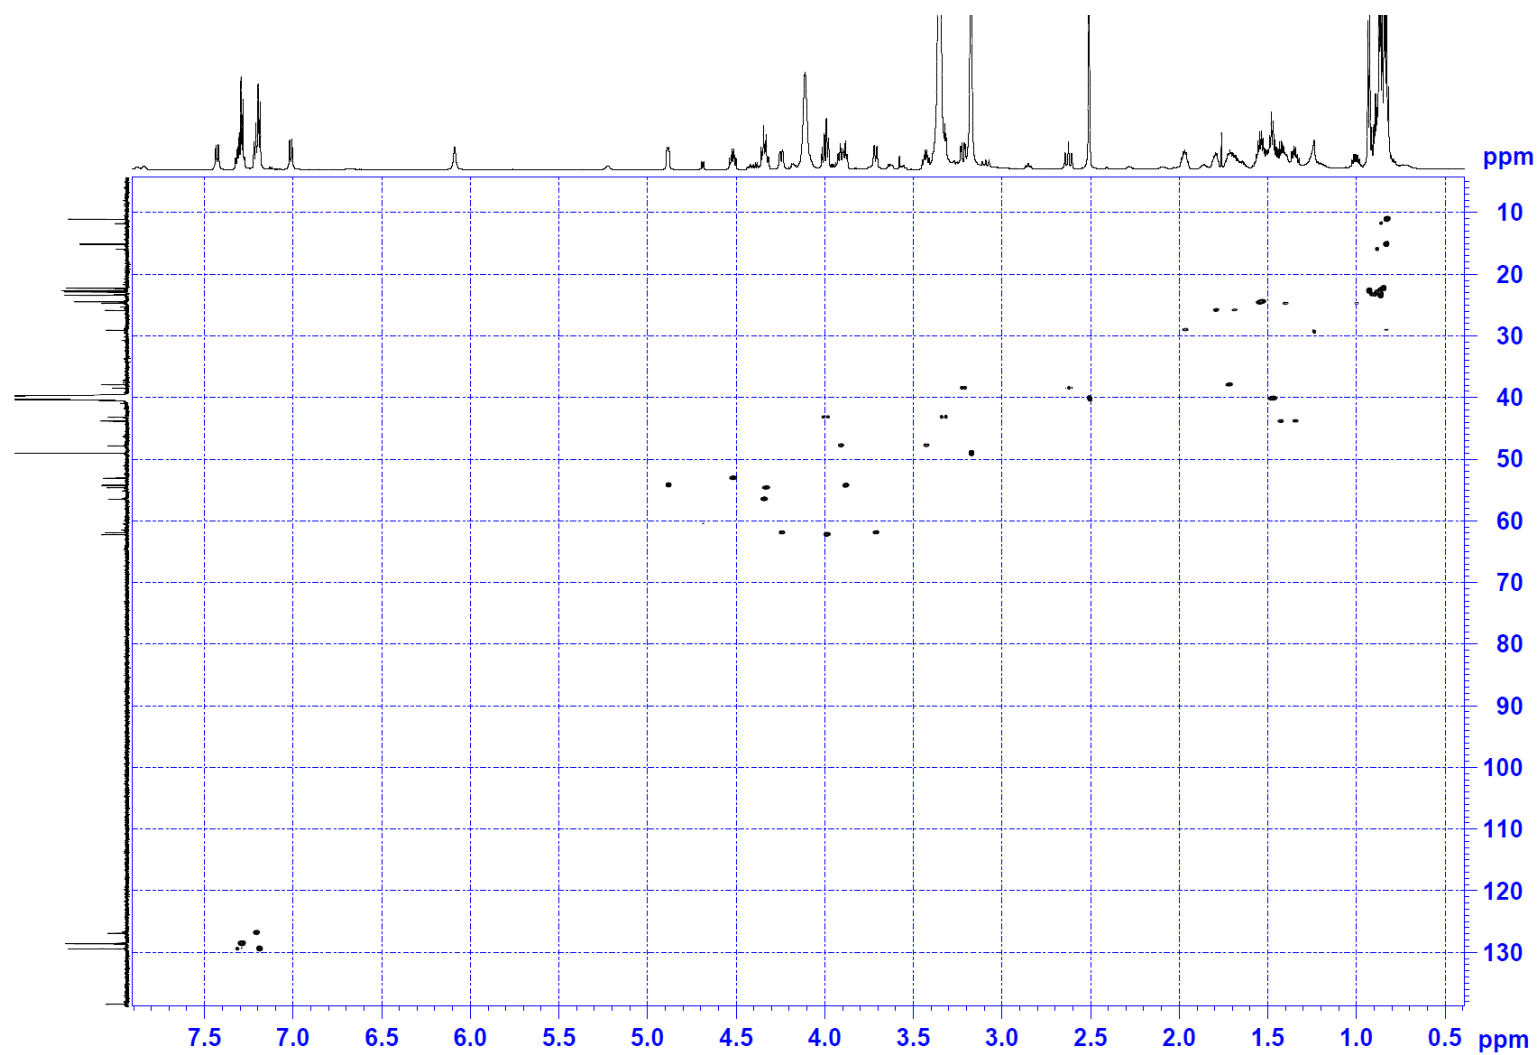

**Figure S24.** HSQC spectrum of compound **3**

S27

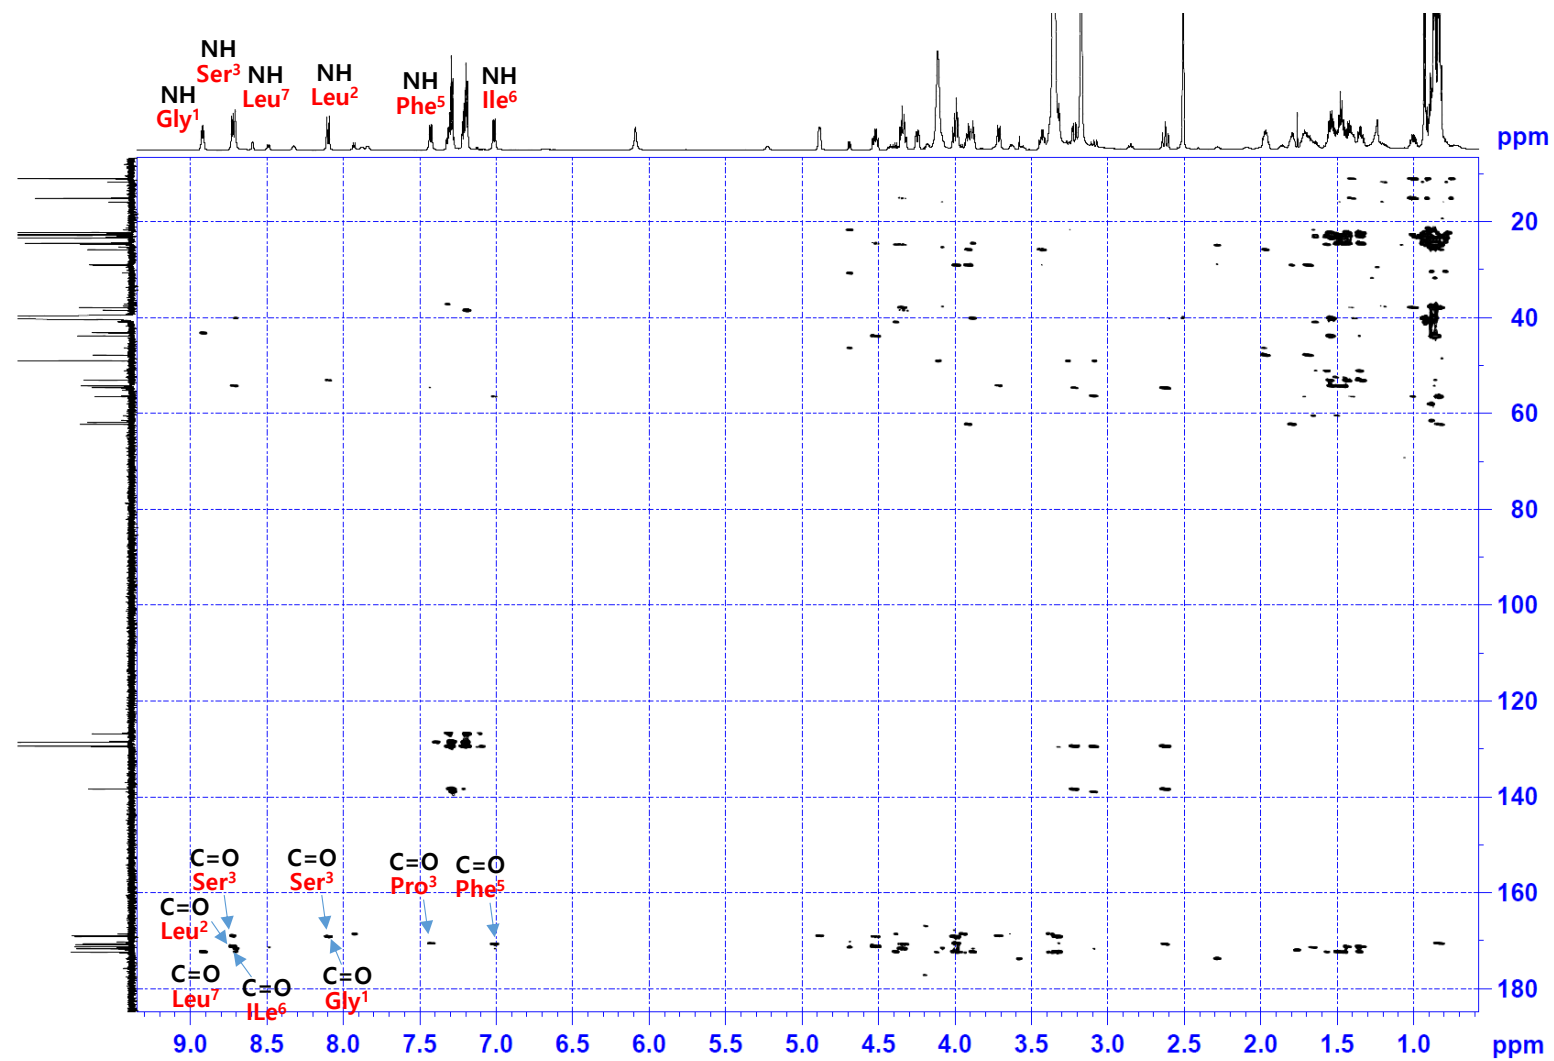

Figure S25. HMBC spectrum of compound 3  
S28

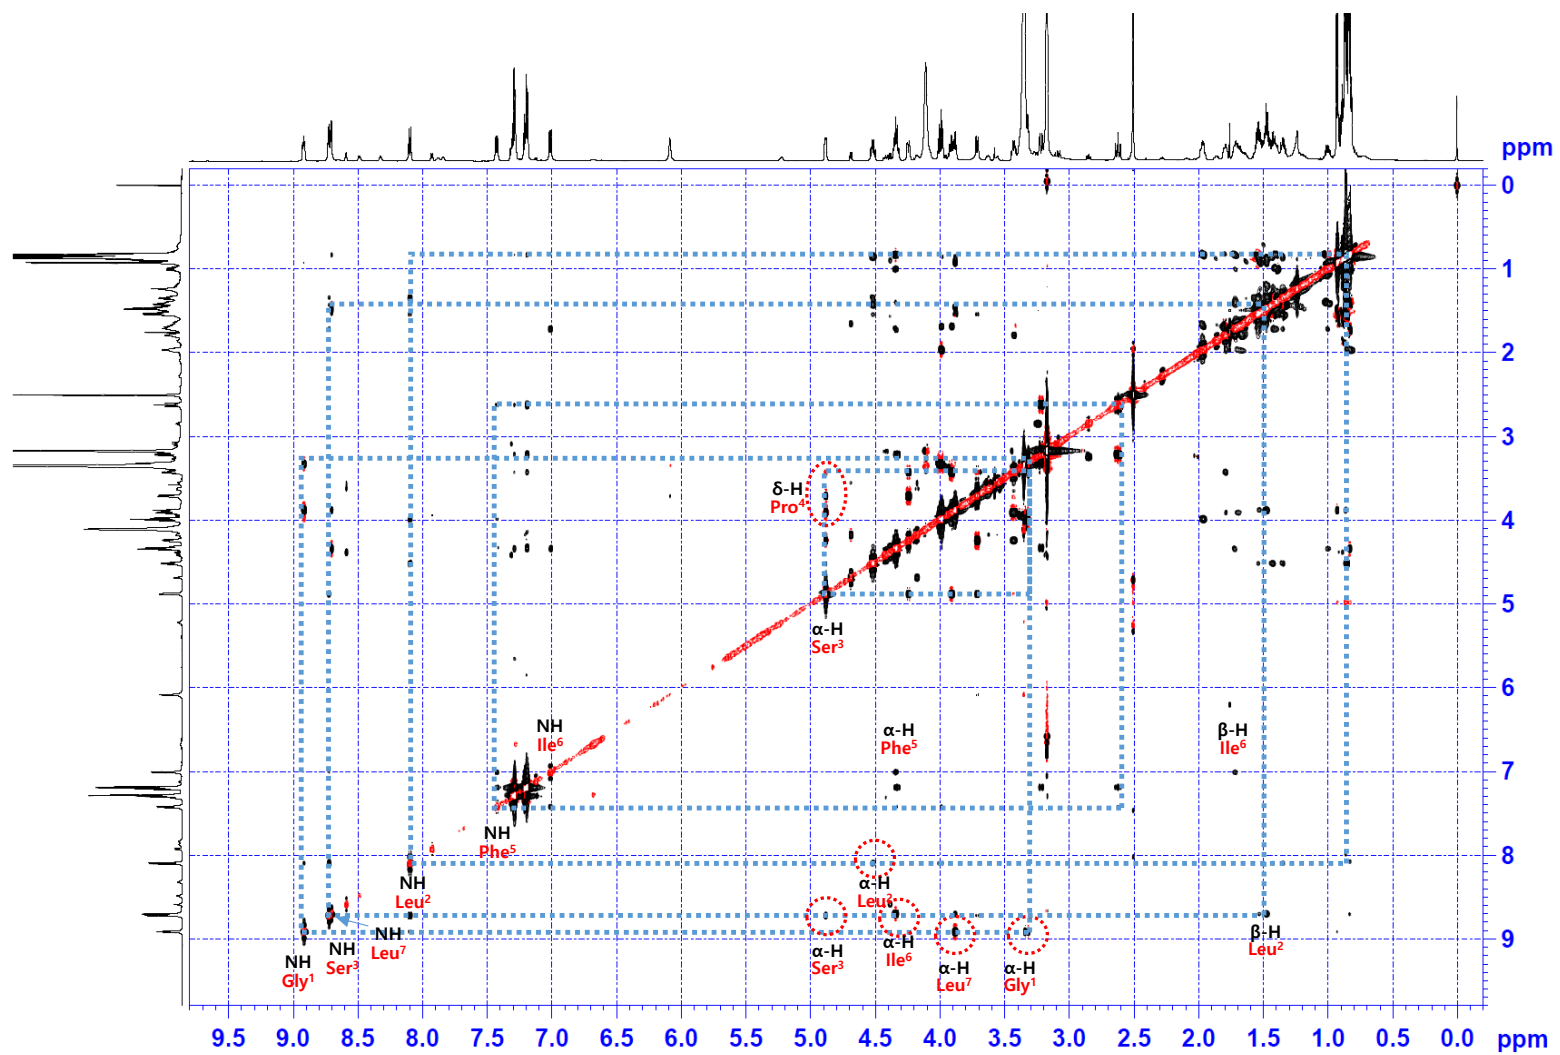

Figure S26. ROESY spectrum of compound 3

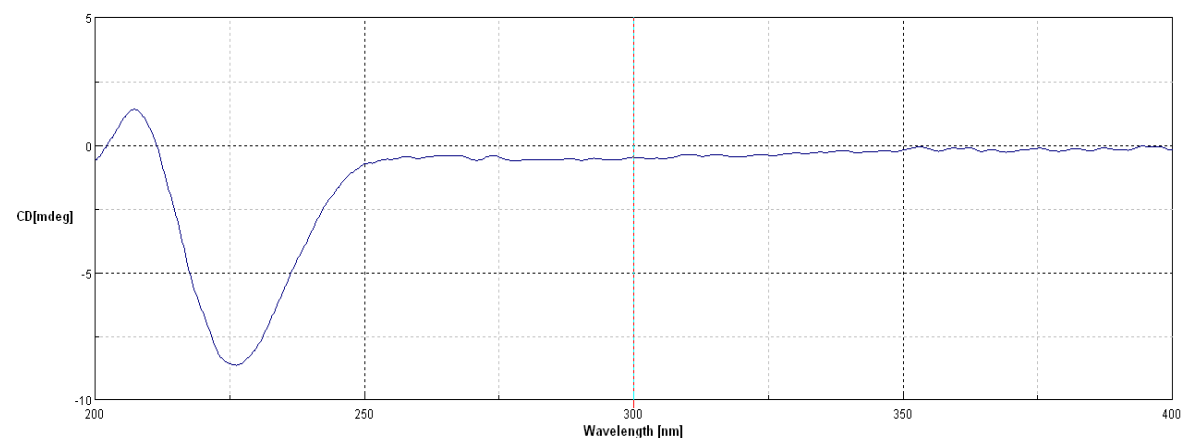

**Figure S27.** ECD spectrum of compound **3**

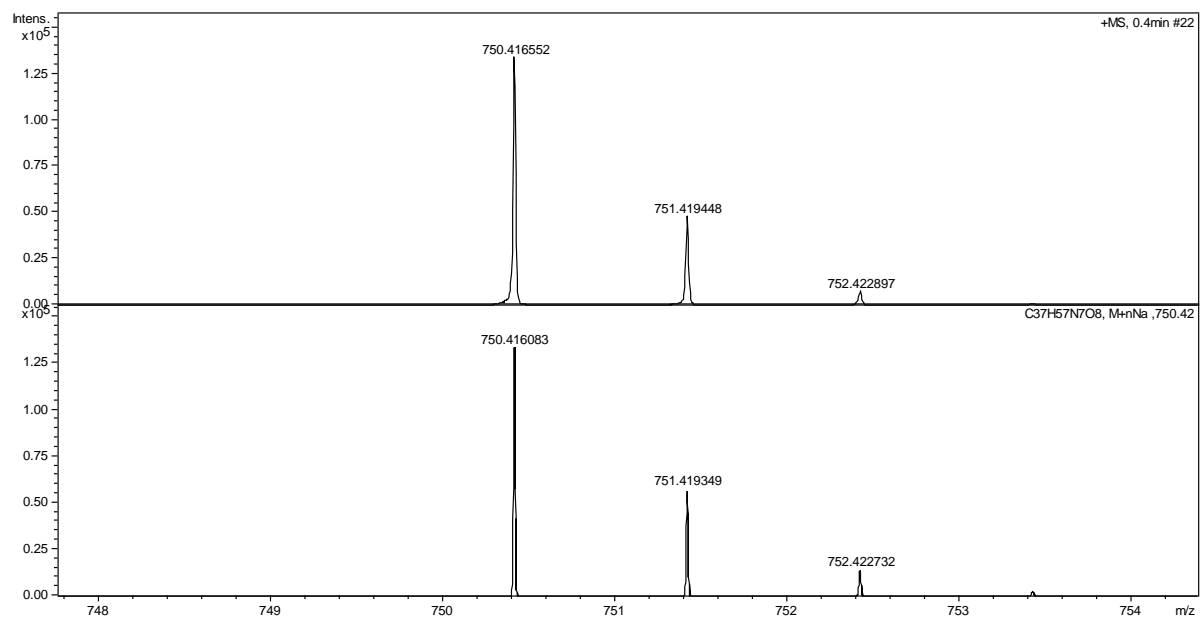

**Figure S28.** HRESI-MS spectrum of compound **3**

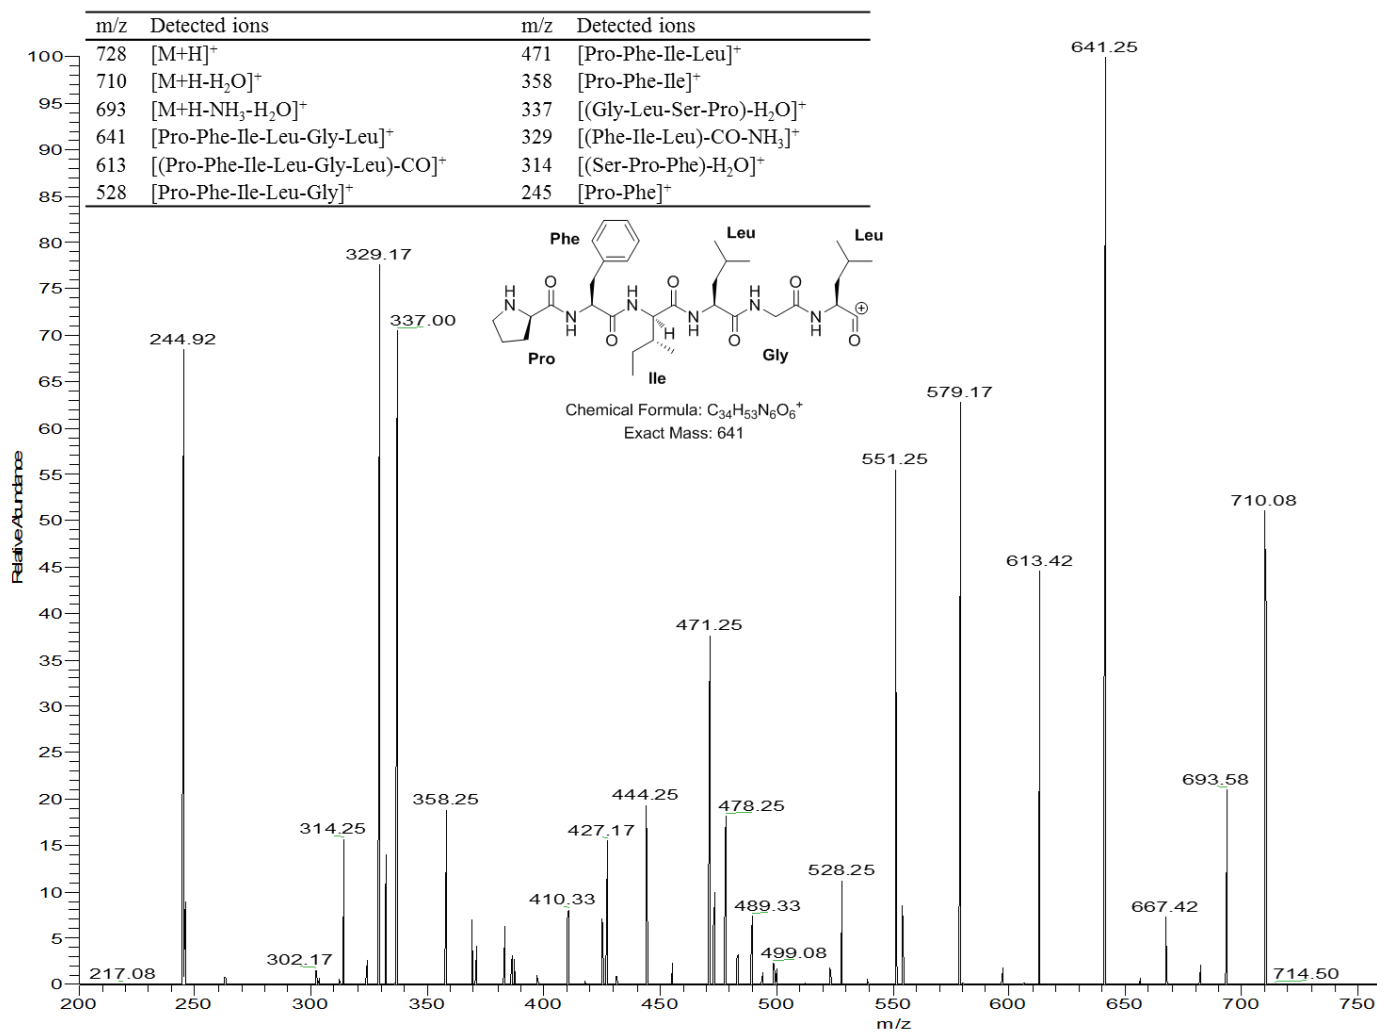

**Figure S29.** ESI-MS/MS spectrum of compound **3**



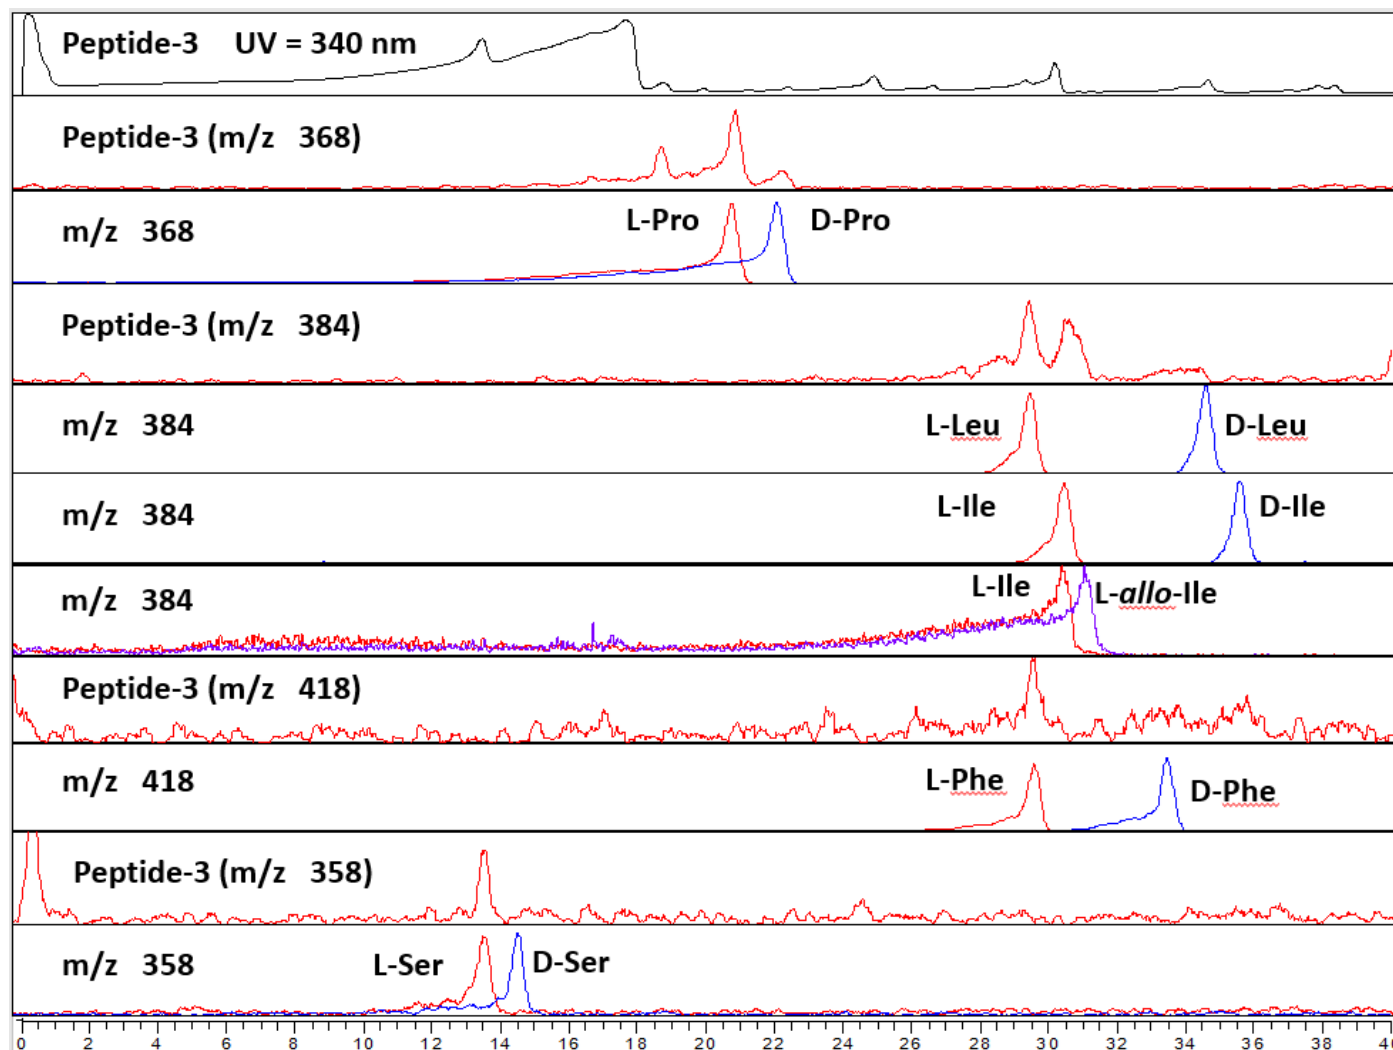

Figure S30. Marfey's analysis of compound 3

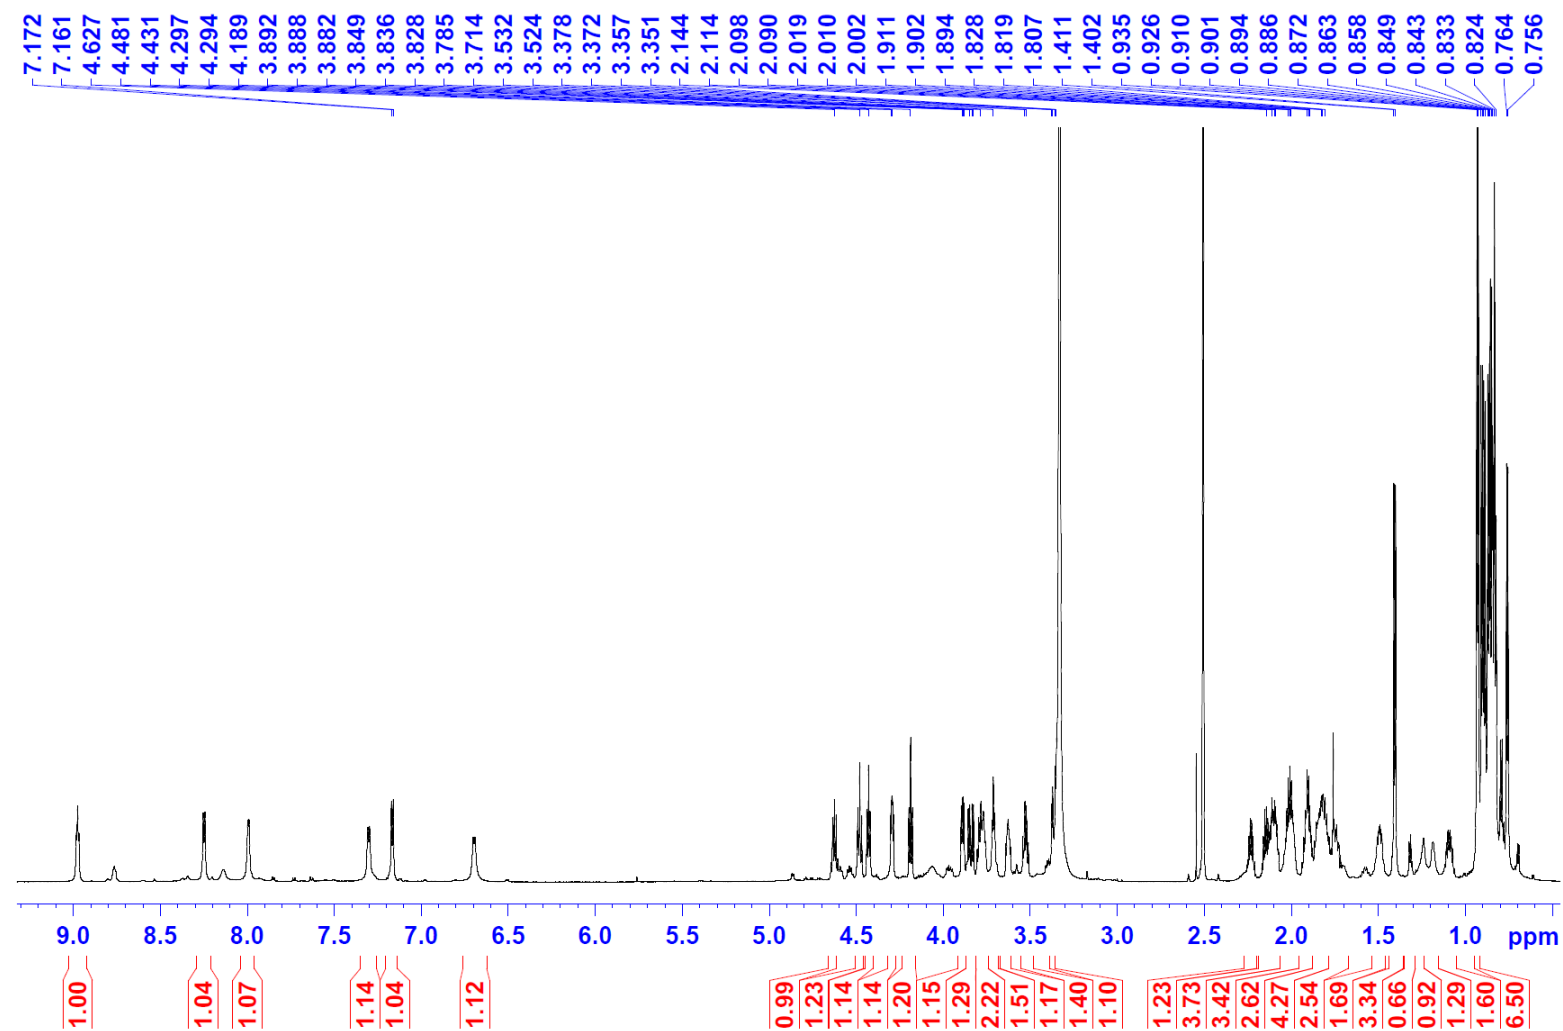

**Figure S31.**  $^1\text{H}$  NMR spectrum of compound **4** ( $\text{DMSO-}d_6$ , 700 MHz)

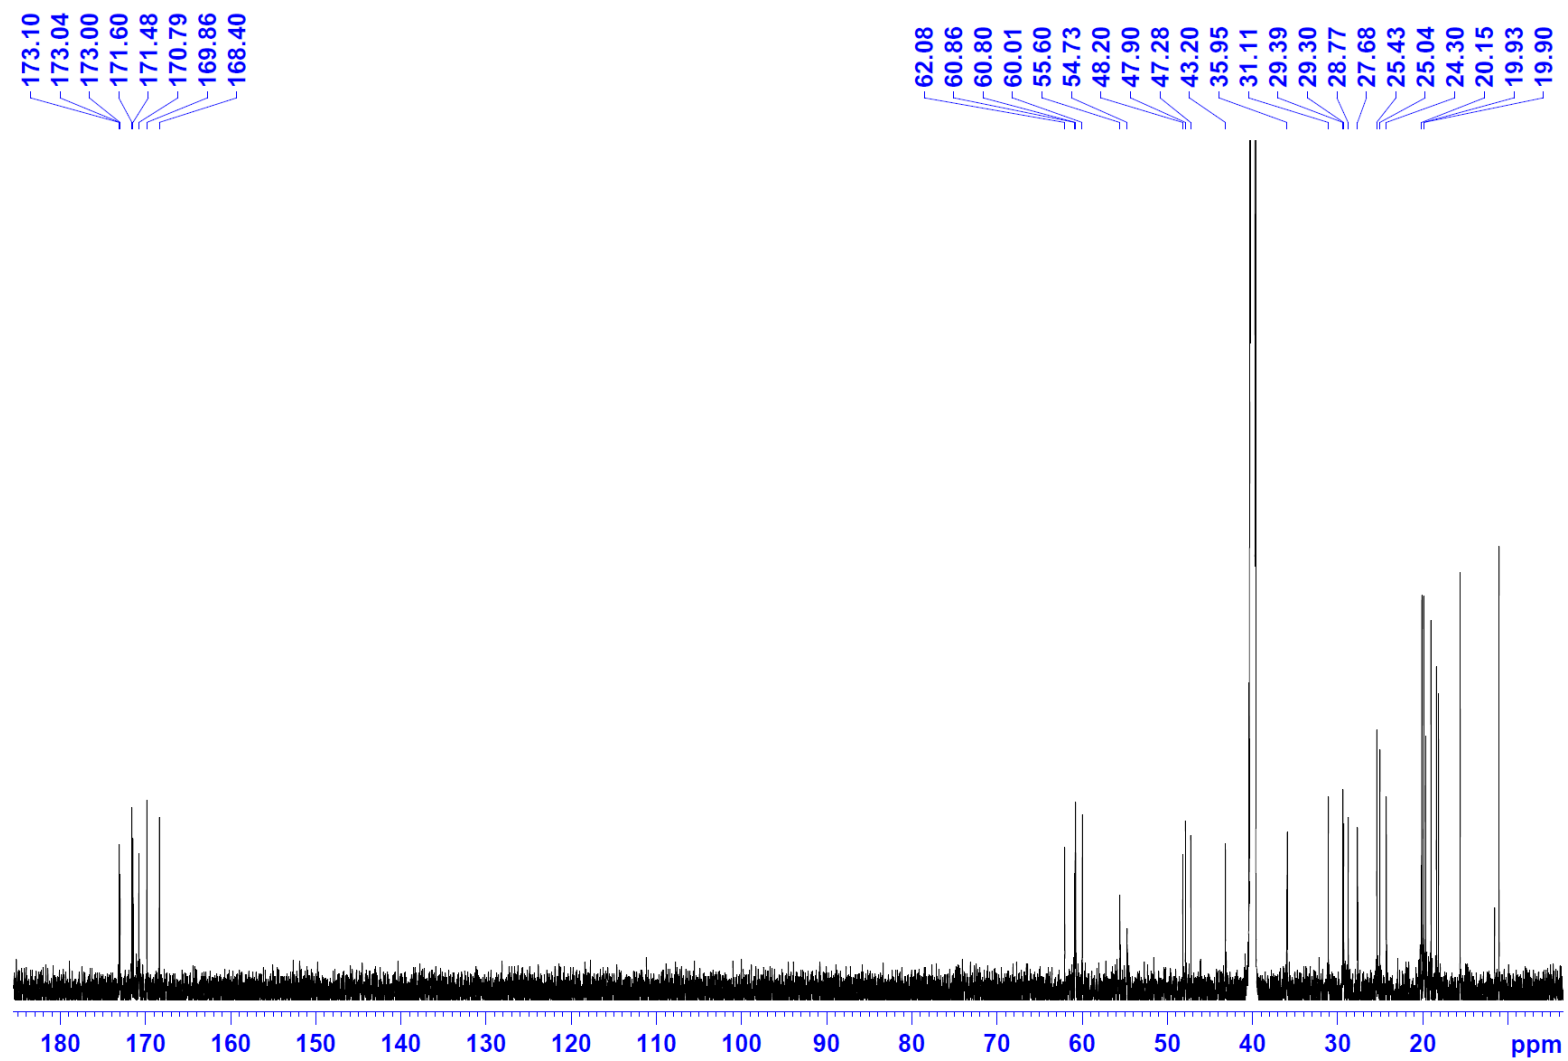

**Figure S32.** <sup>13</sup>C NMR spectrum of compound **4** (DMSO-*d*<sub>6</sub>, 175 MHz)

COSY of DSC992 in DMSO

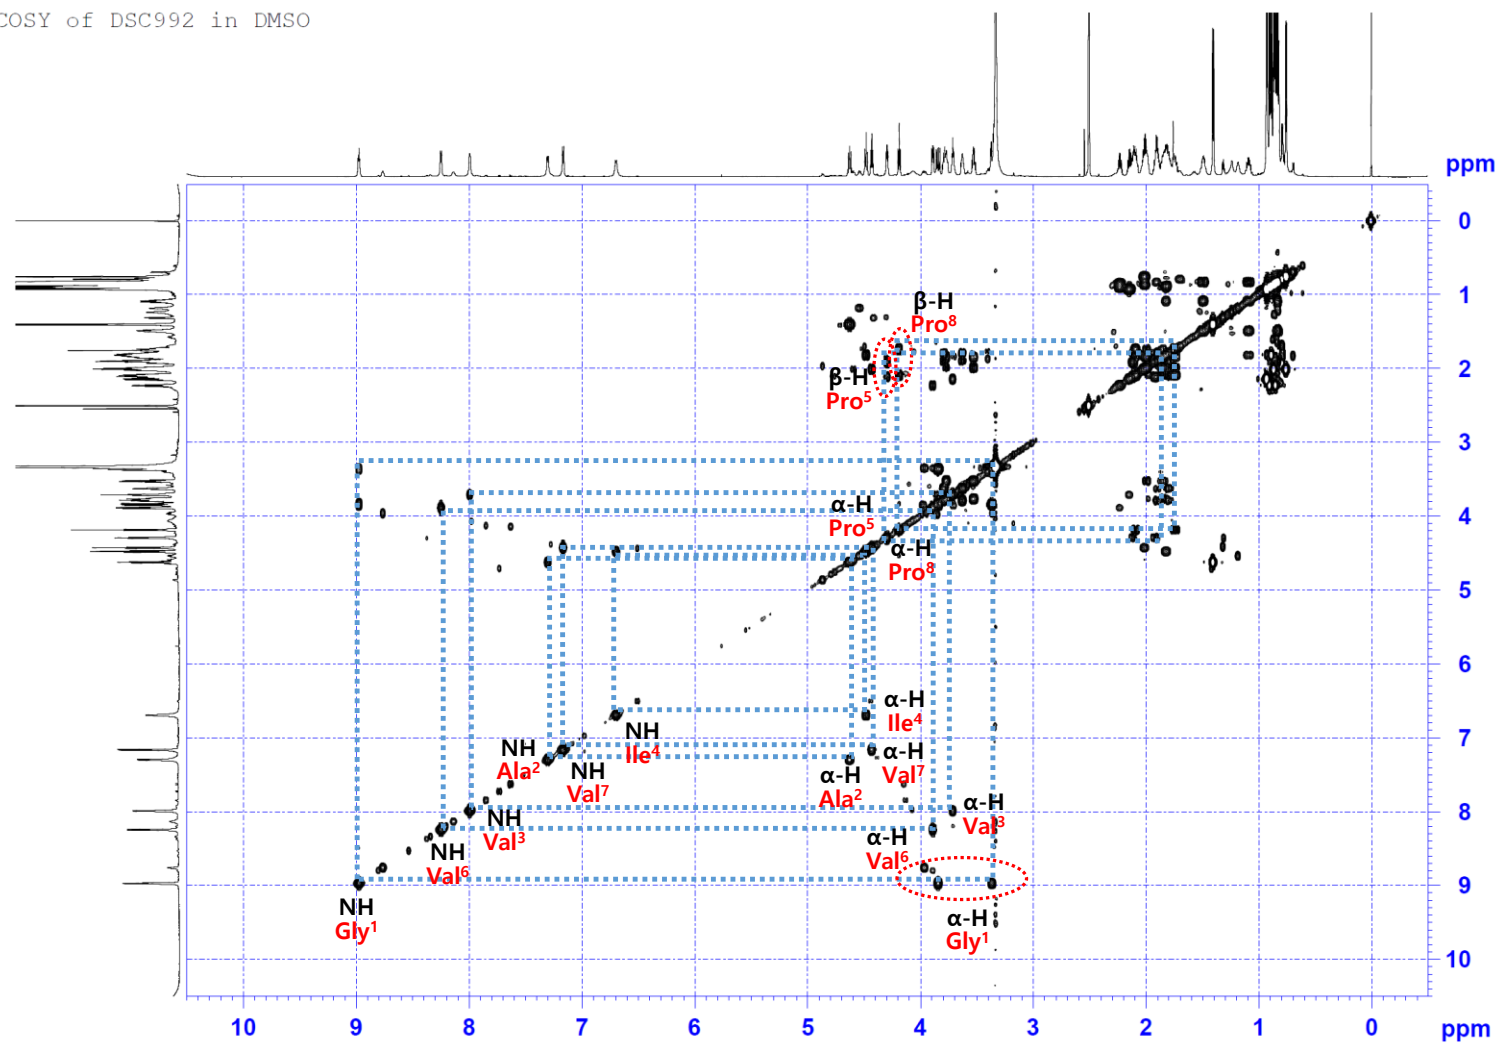

Figure S33. COSY spectrum of compound 4

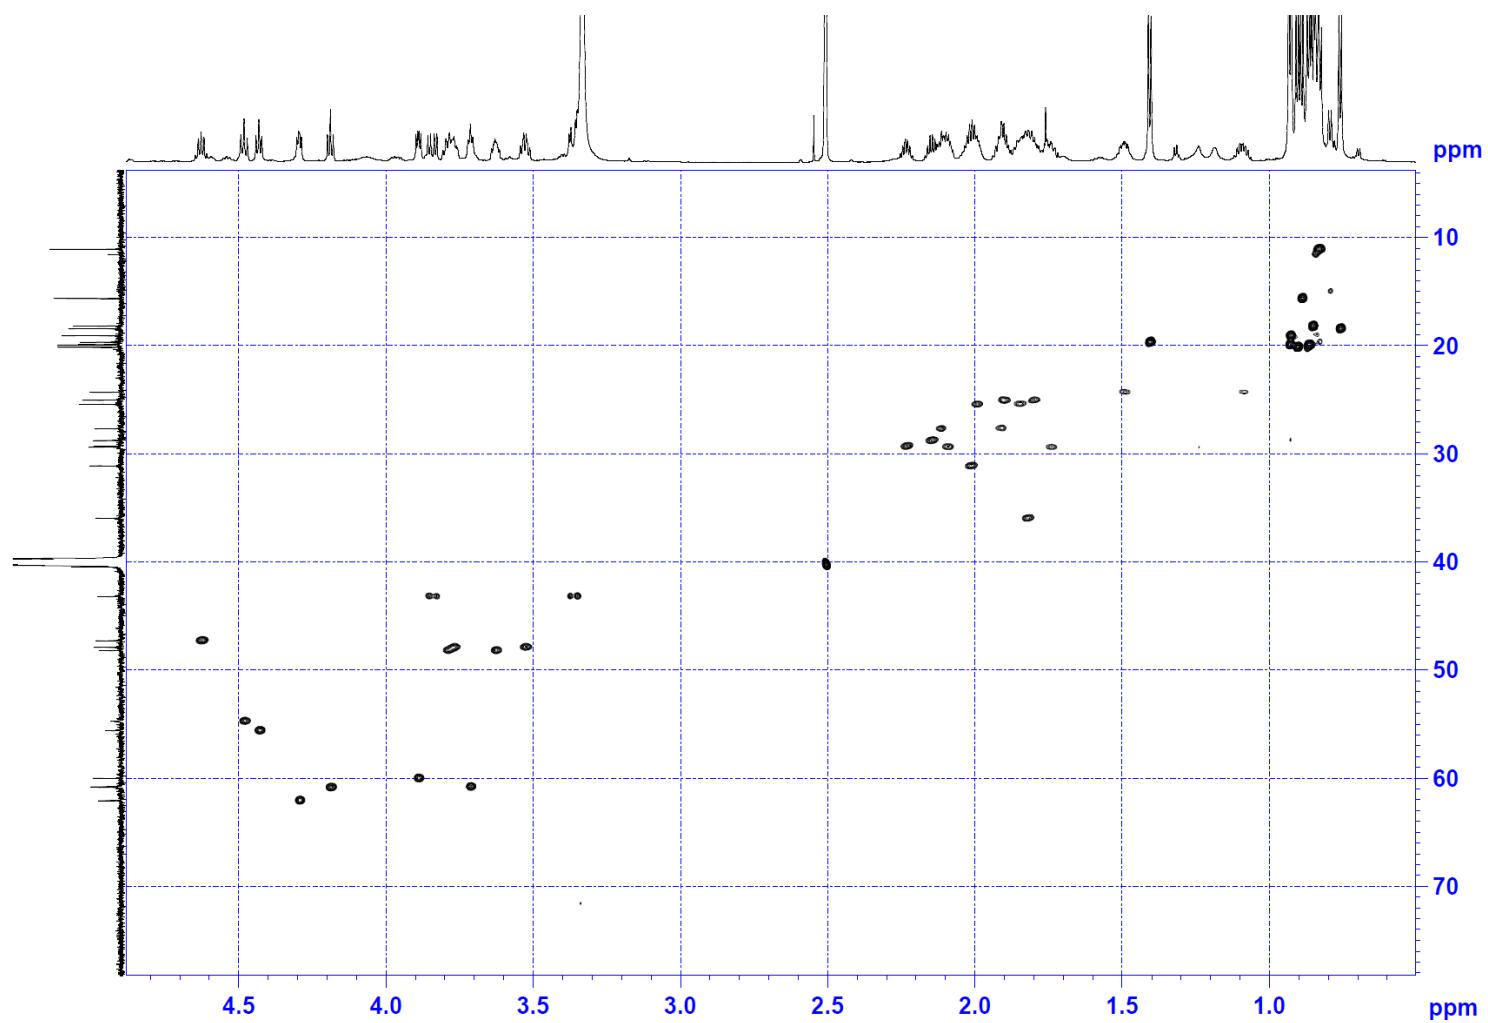

**Figure S34.** HSQC spectrum of compound **4**

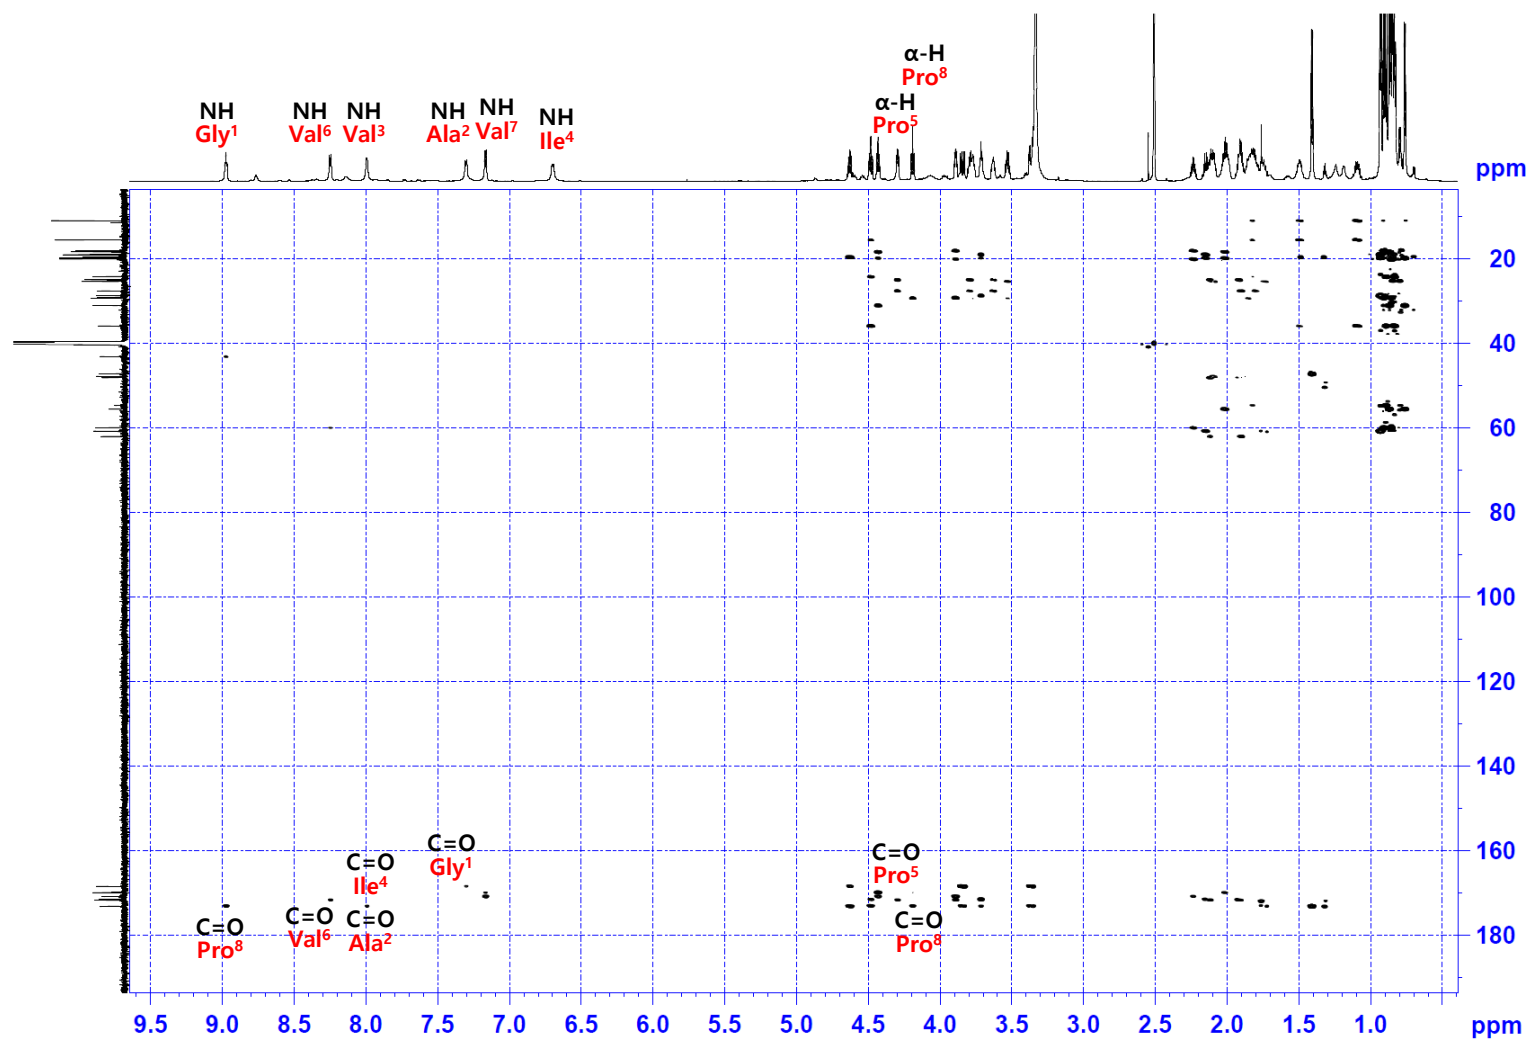

Figure S35. HMBC spectrum of compound 4

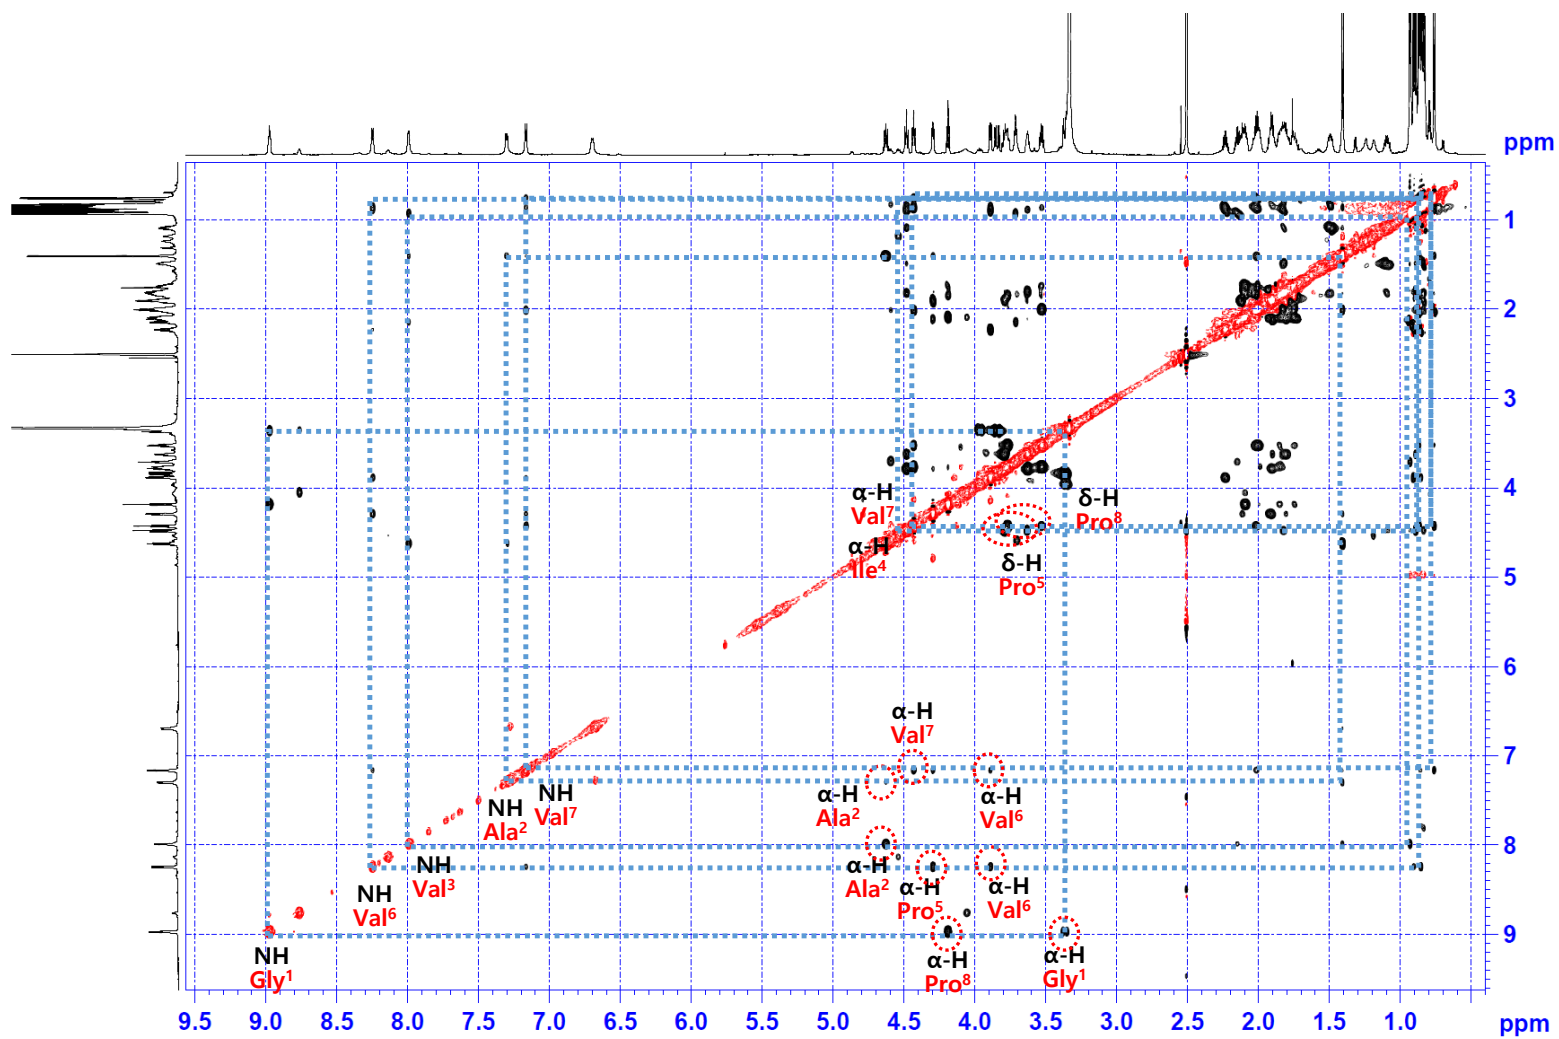

Figure S36. ROESY spectrum of compound 4

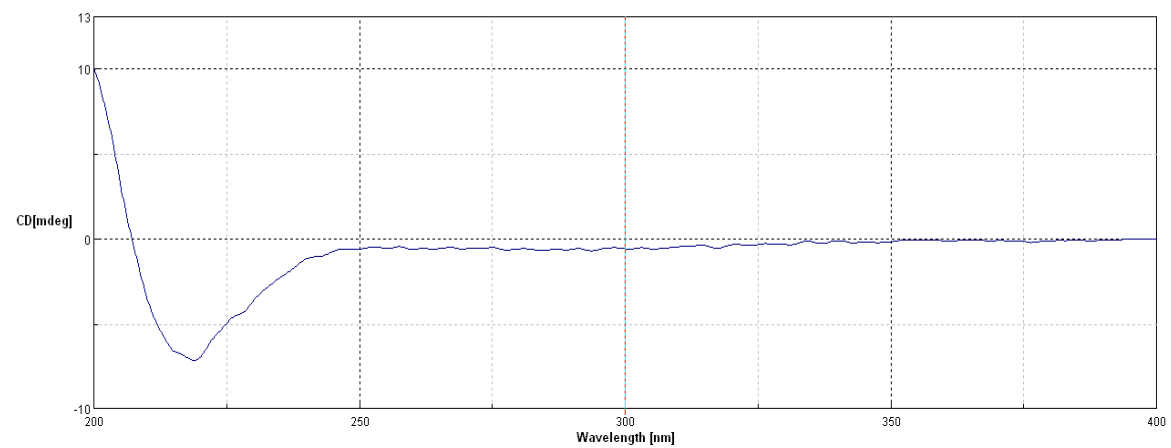

**Figure S37.** ECD spectrum of compound **4**



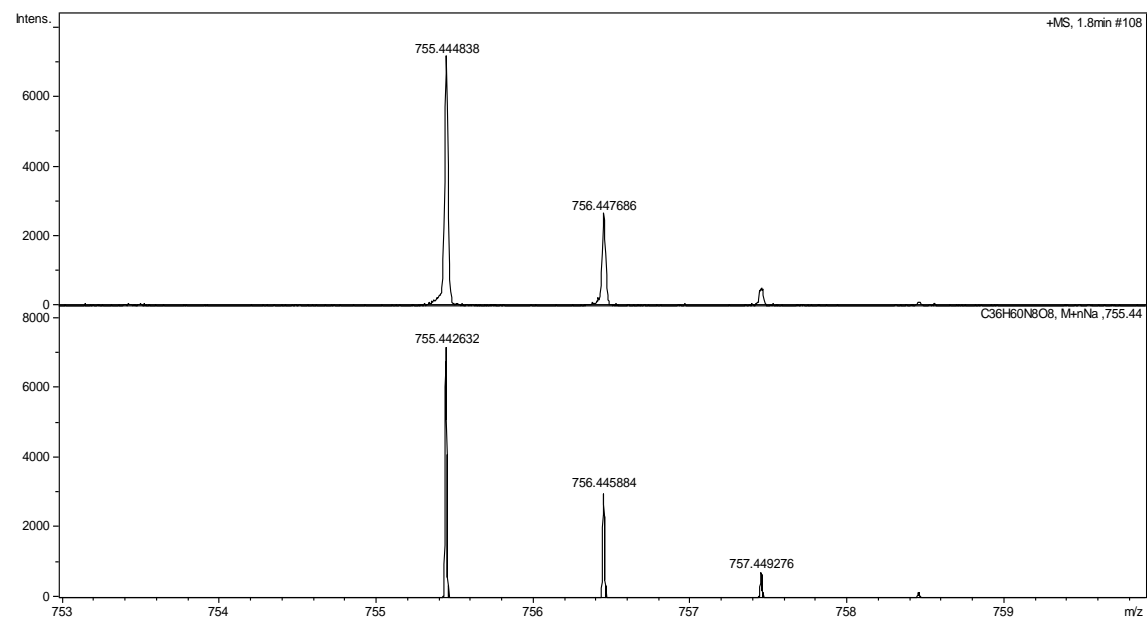

**Figure S38.** HRESI-MS spectrum of compound **4**

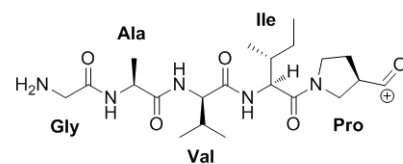

Chemical Formula:  $C_{21}H_{36}N_5O_5^+$   
Exact Mass: 438

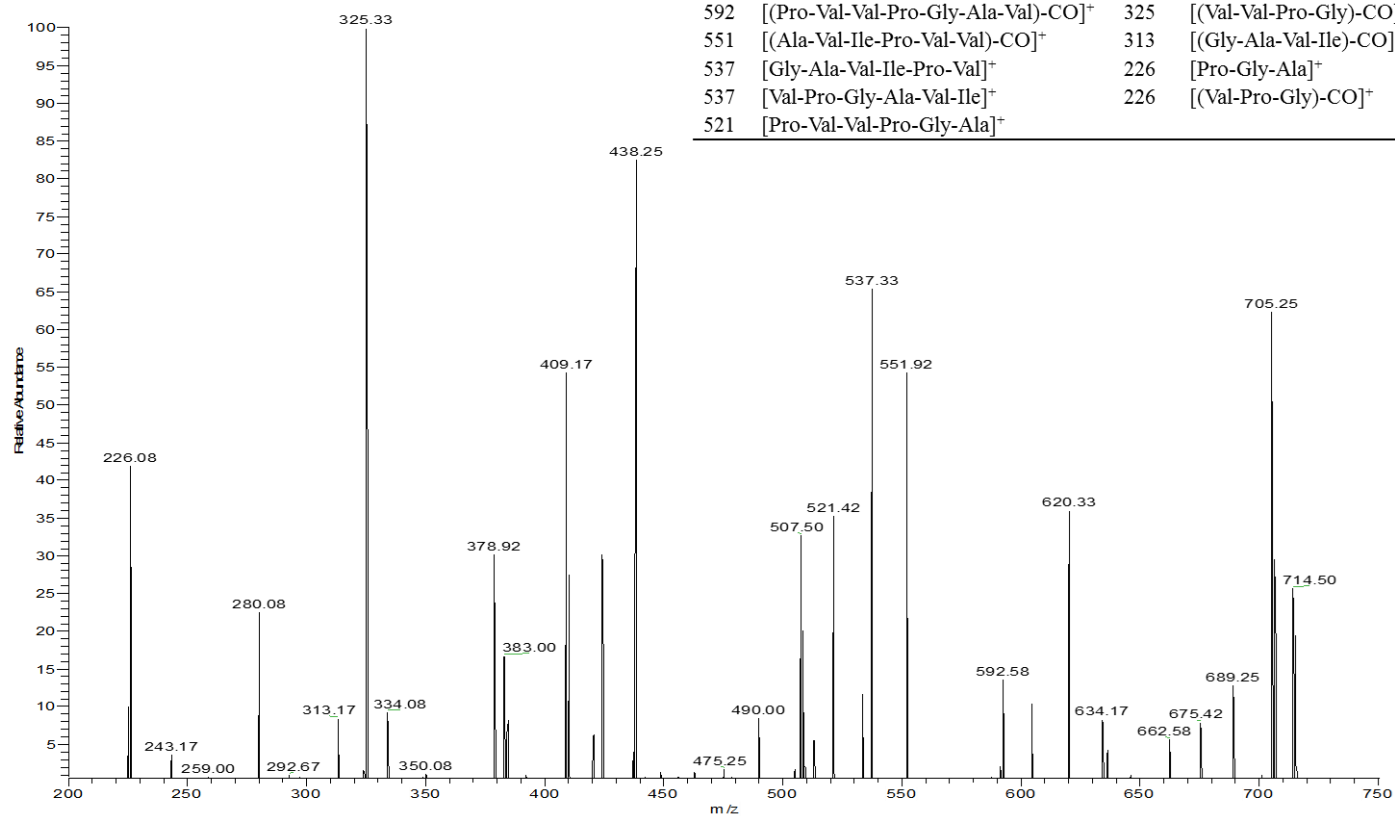

| m/z | Detected ions                                 | m/z | Detected ions                     |
|-----|-----------------------------------------------|-----|-----------------------------------|
| 733 | $[M+H]^+$                                     | 508 | $[\text{Val-Ile-Pro-Val-Val}]^+$  |
| 705 | $[M+H-CO]^+$                                  | 438 | $[\text{Gly-Ala-Val-Ile-Pro}]^+$  |
| 662 | $[\text{Val-Ile-Pro-Val-Val-Pro-Gly}]^+$      | 438 | $[\text{Pro-Gly-Ala-Val-Ile}]^+$  |
| 634 | $[\text{Ile-Pro-Val-Val-Pro-Gly-Ala}]^+$      | 409 | $[\text{Val-Ile-Pro-Val}]^+$      |
| 634 | $[\text{Val-Pro-Gly-Ala-Val-Ile-Pro}]^+$      | 409 | $[\text{Ile-Pro-Val-Val}]^+$      |
| 634 | $[\text{Pro-Gly-Ala-Val-Ile-Pro-Val}]^+$      | 325 | $[\text{Val-Pro-Gly-Ala}]^+$      |
| 620 | $[\text{Pro-Val-Val-Pro-Gly-Ala-Val}]^+$      | 325 | $[\text{Pro-Gly-Ala-Val}]^+$      |
| 592 | $[(\text{Pro-Val-Val-Pro-Gly-Ala-Val})-CO]^+$ | 325 | $[(\text{Val-Val-Pro-Gly})-CO]^+$ |
| 551 | $[(\text{Ala-Val-Ile-Pro-Val-Val})-CO]^+$     | 313 | $[(\text{Gly-Ala-Val-Ile})-CO]^+$ |
| 537 | $[\text{Gly-Ala-Val-Ile-Pro-Val}]^+$          | 226 | $[\text{Pro-Gly-Ala}]^+$          |
| 537 | $[\text{Val-Pro-Gly-Ala-Val-Ile}]^+$          | 226 | $[(\text{Val-Pro-Gly})-CO]^+$     |
| 521 | $[\text{Pro-Val-Val-Pro-Gly-Ala}]^+$          |     |                                   |

Figure S39. ESI-MS/MS spectrum of compound 4  
S42

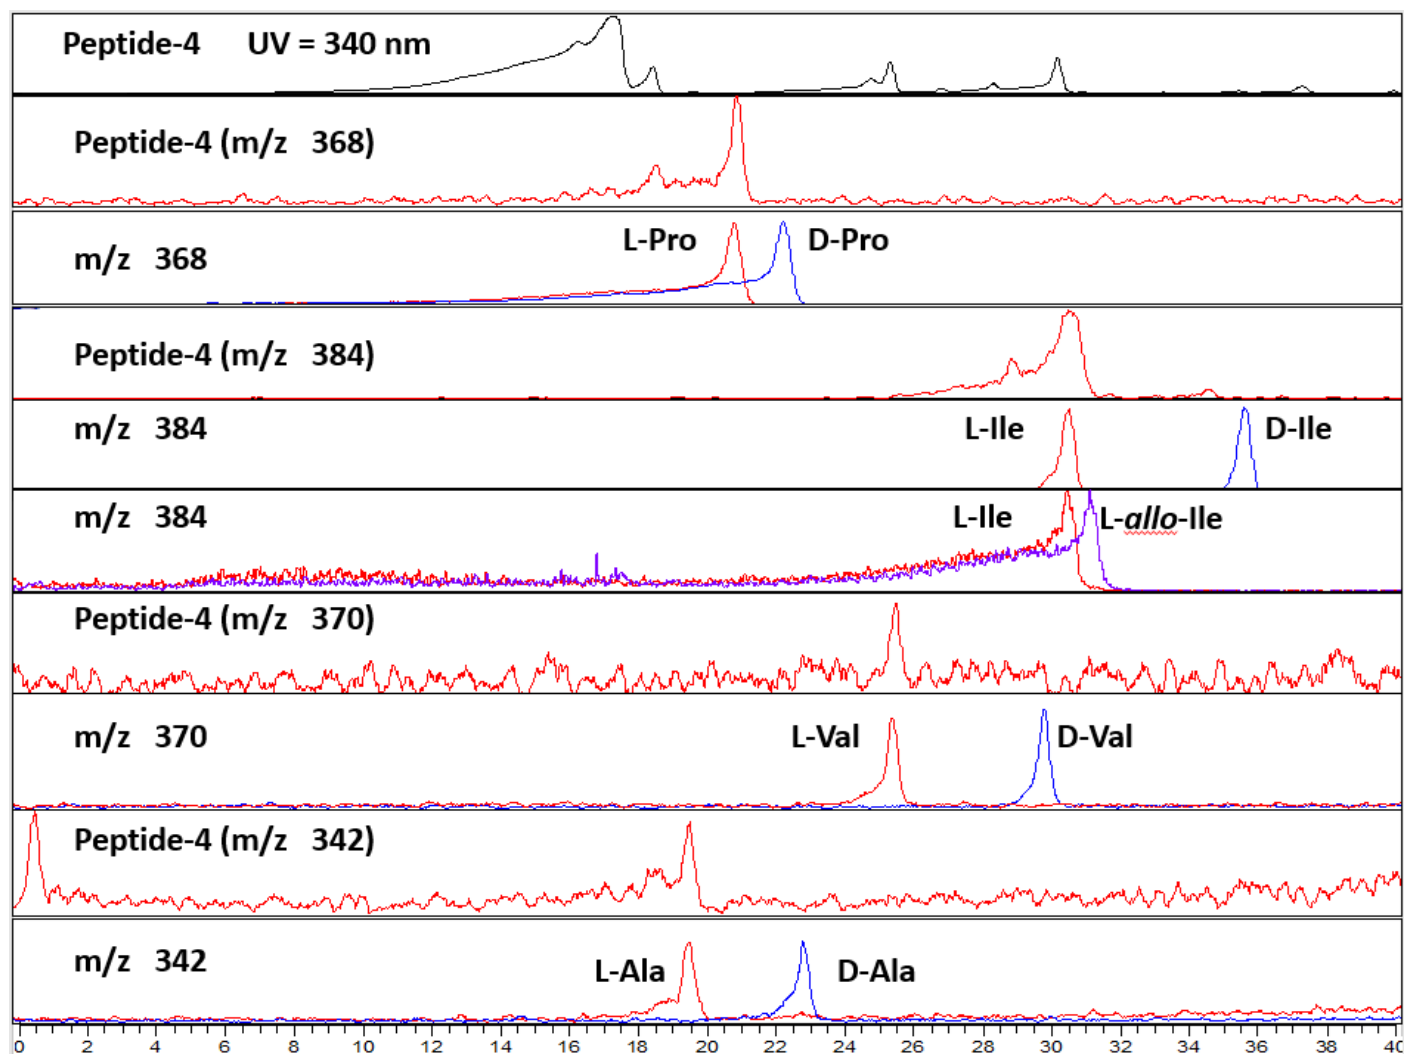

Figure S40. Marfey's analysis of compound 4

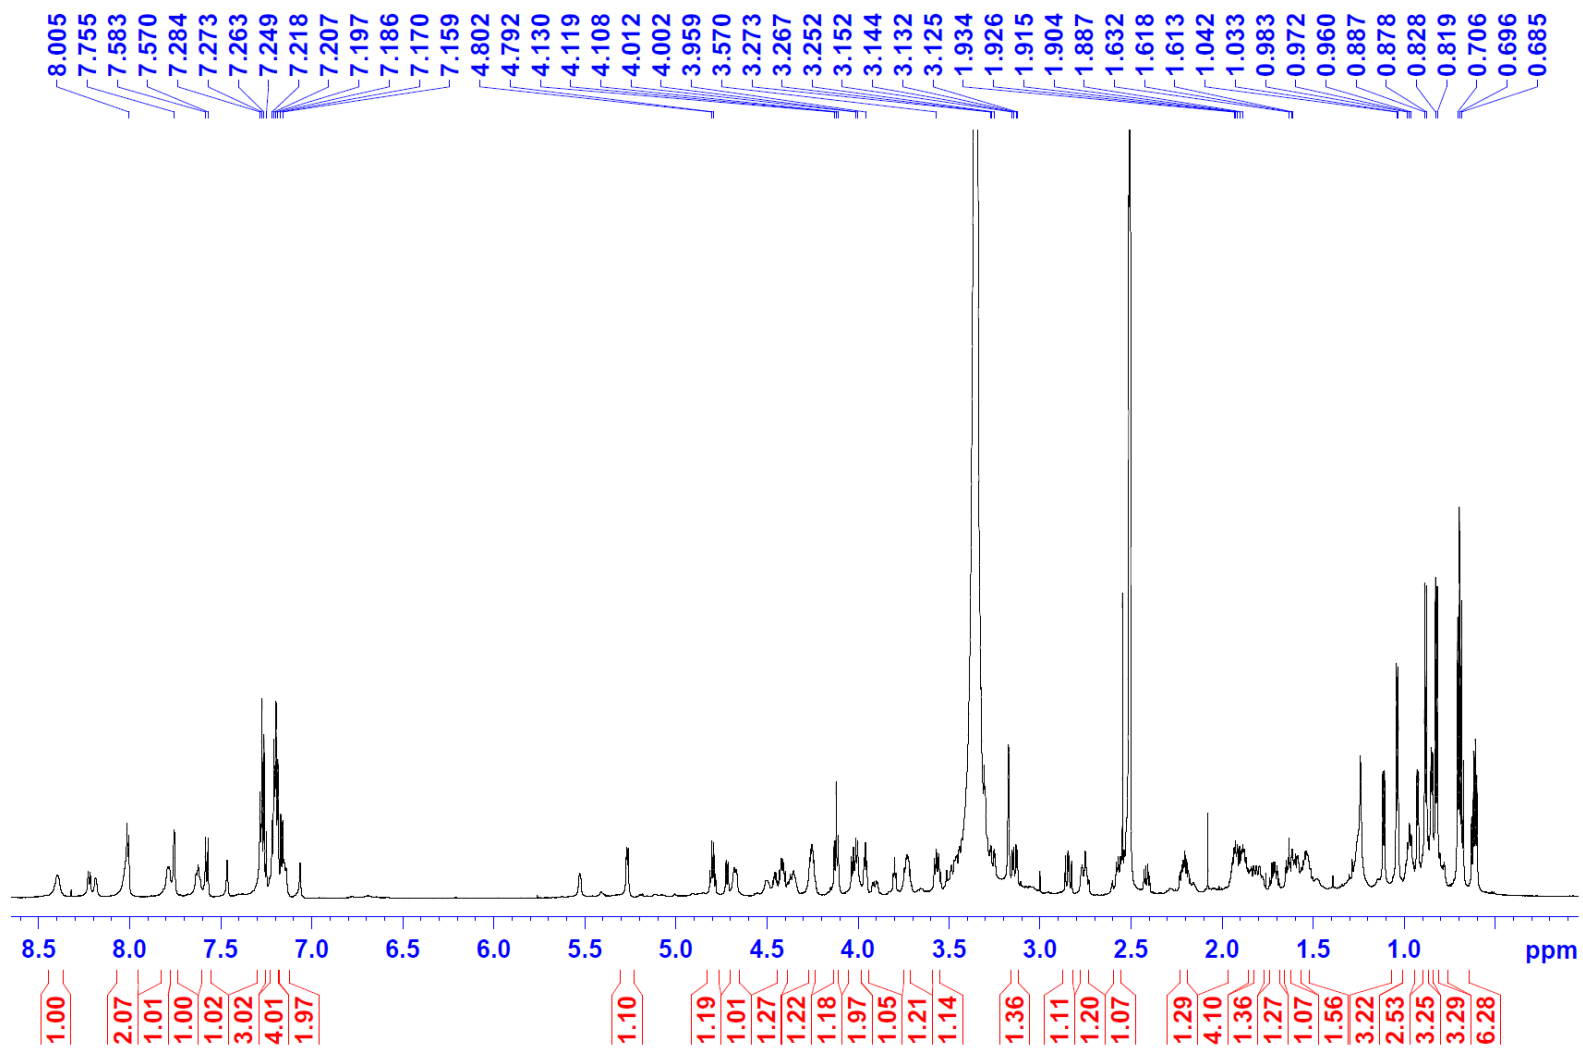

**Figure S41.**  $^1\text{H}$  NMR spectrum of compound **5** ( $\text{DMSO}-d_6$ , 700 MHz)

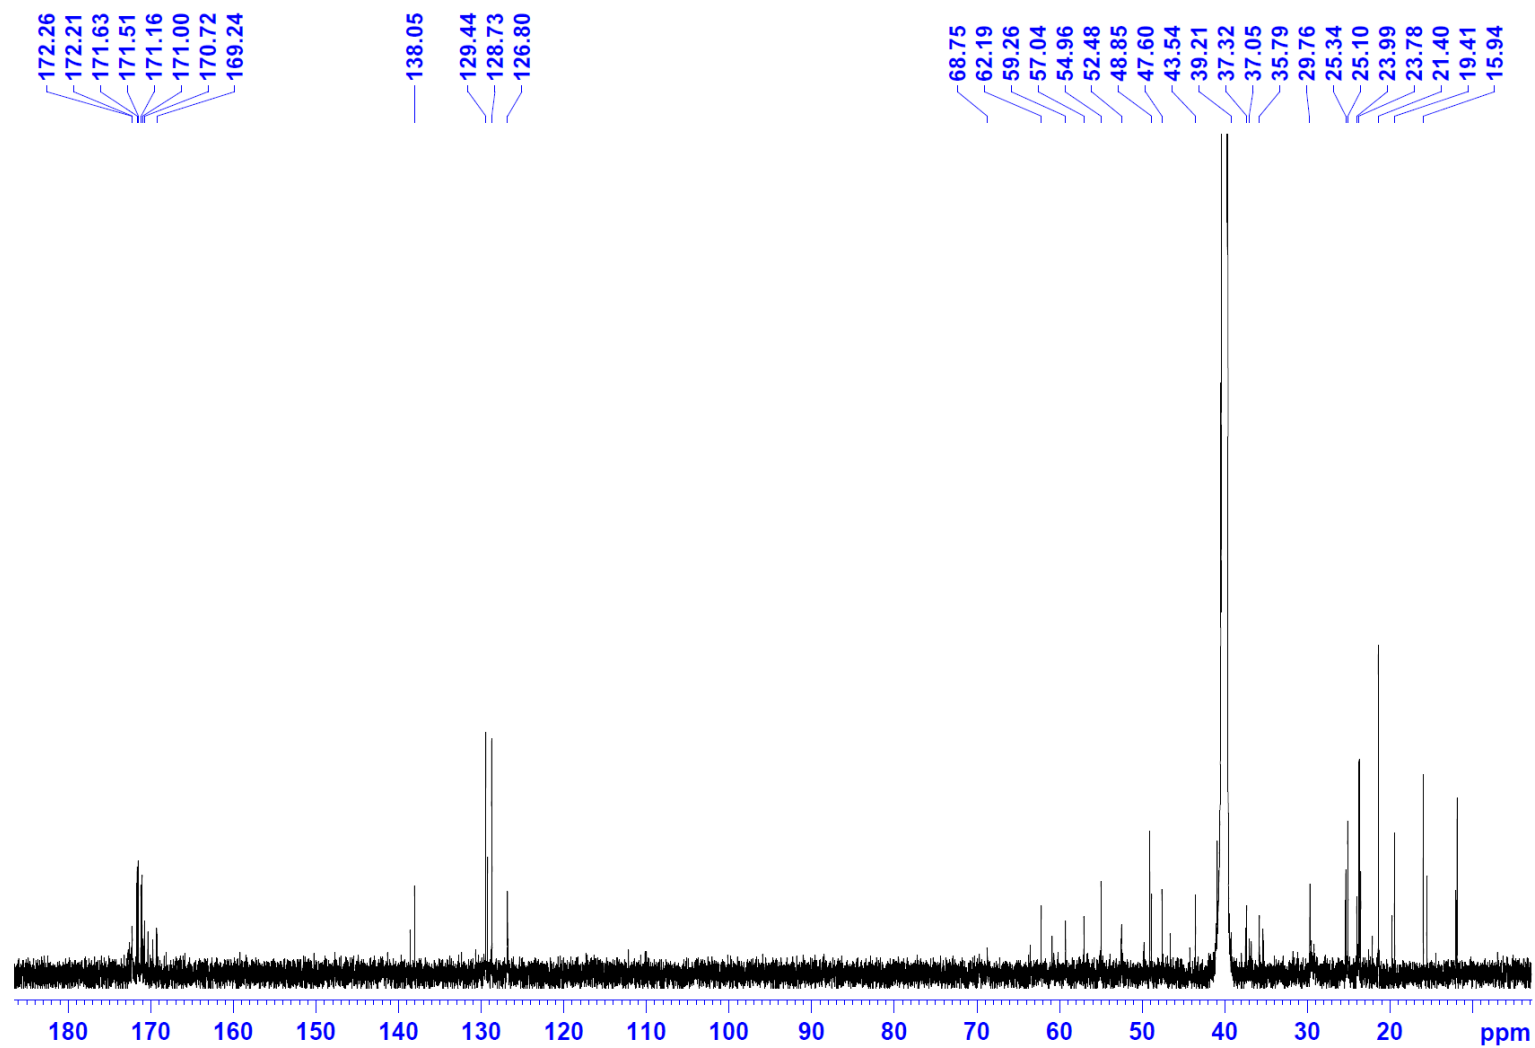

**Figure S42.**  $^{13}\text{C}$  NMR spectrum of compound **5** ( $\text{DMSO-}d_6$ , 175 MHz)

S45

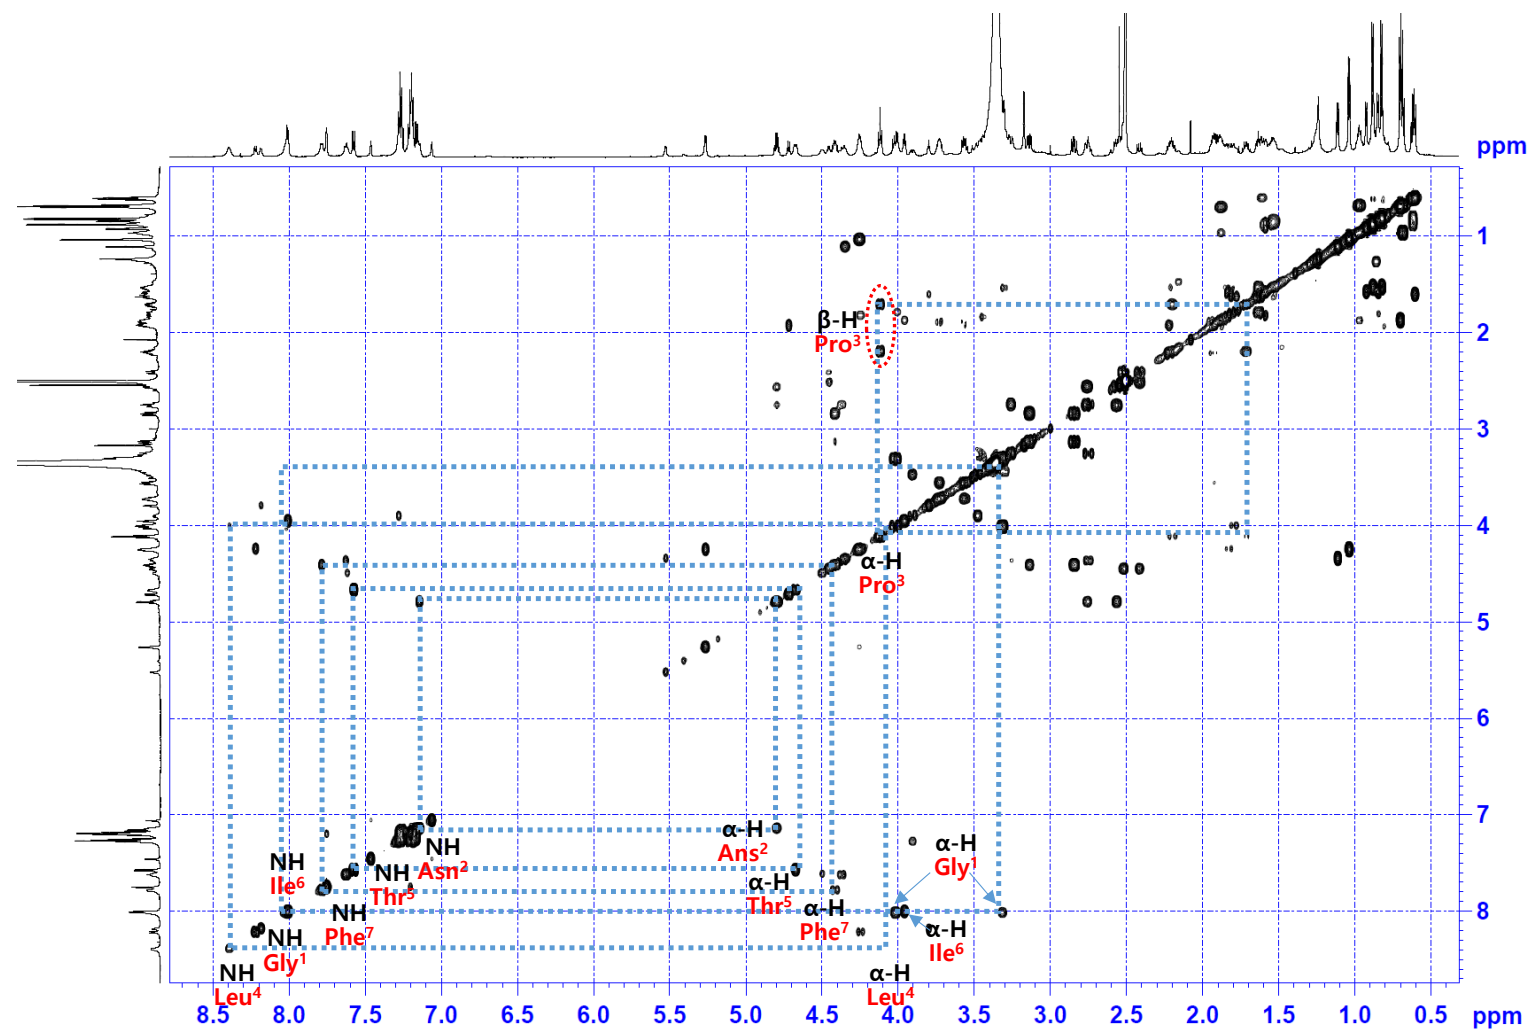

Figure S43. COSY spectrum of compound 5

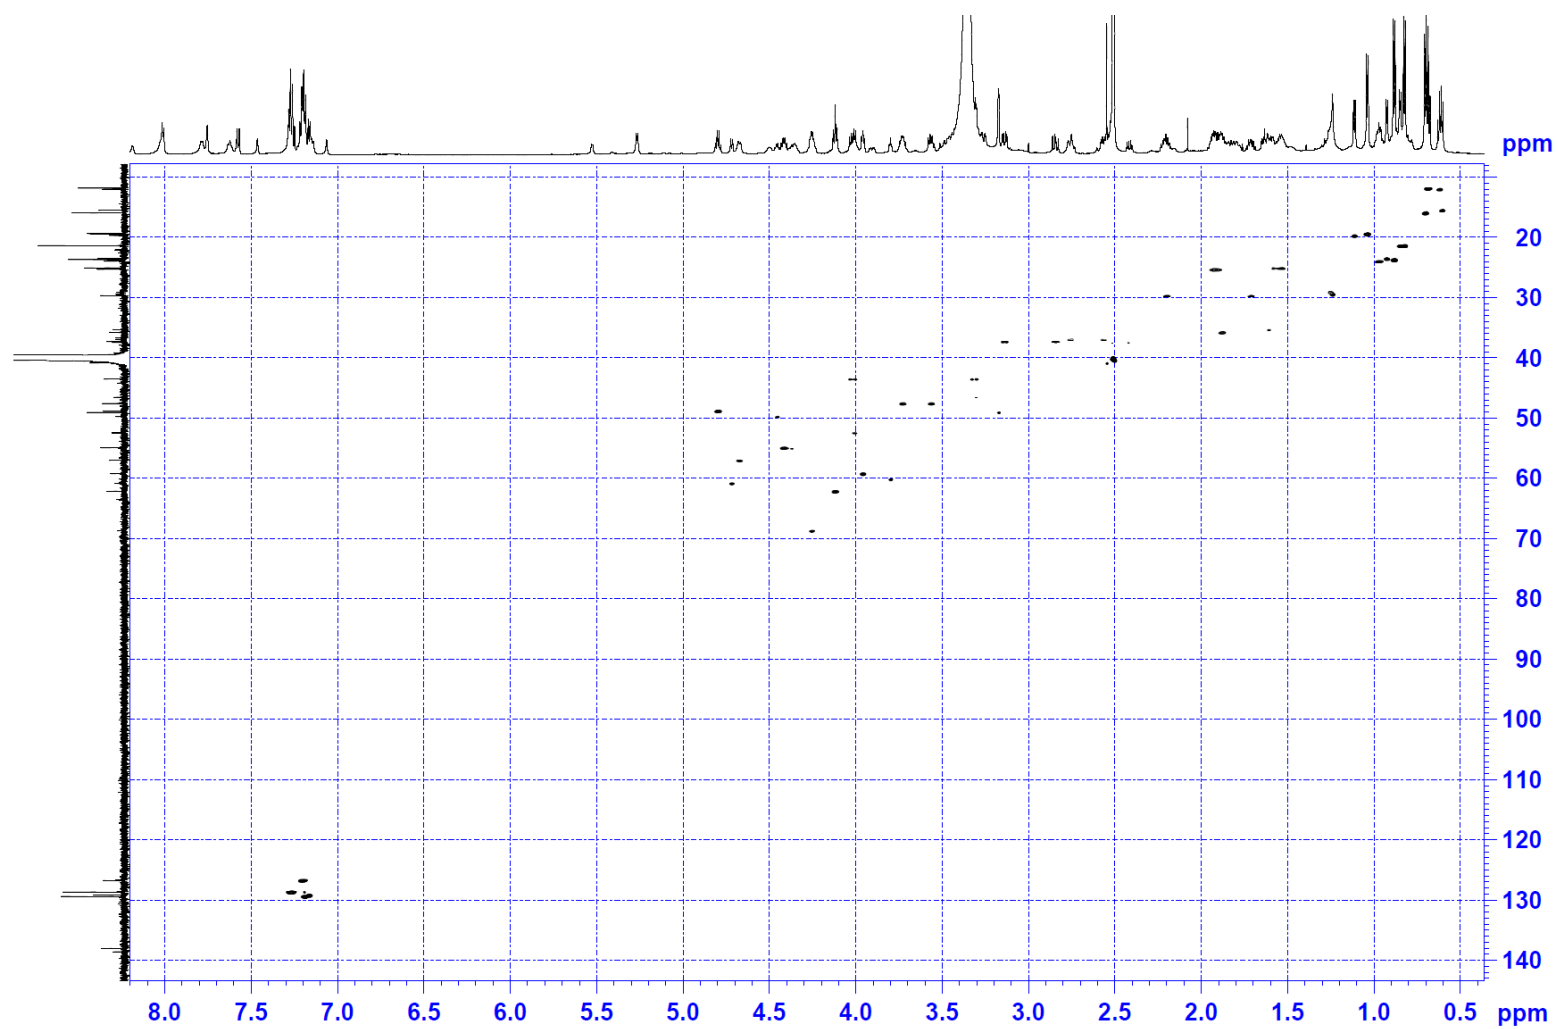

**Figure S44.** HSQC spectrum of compound **5**

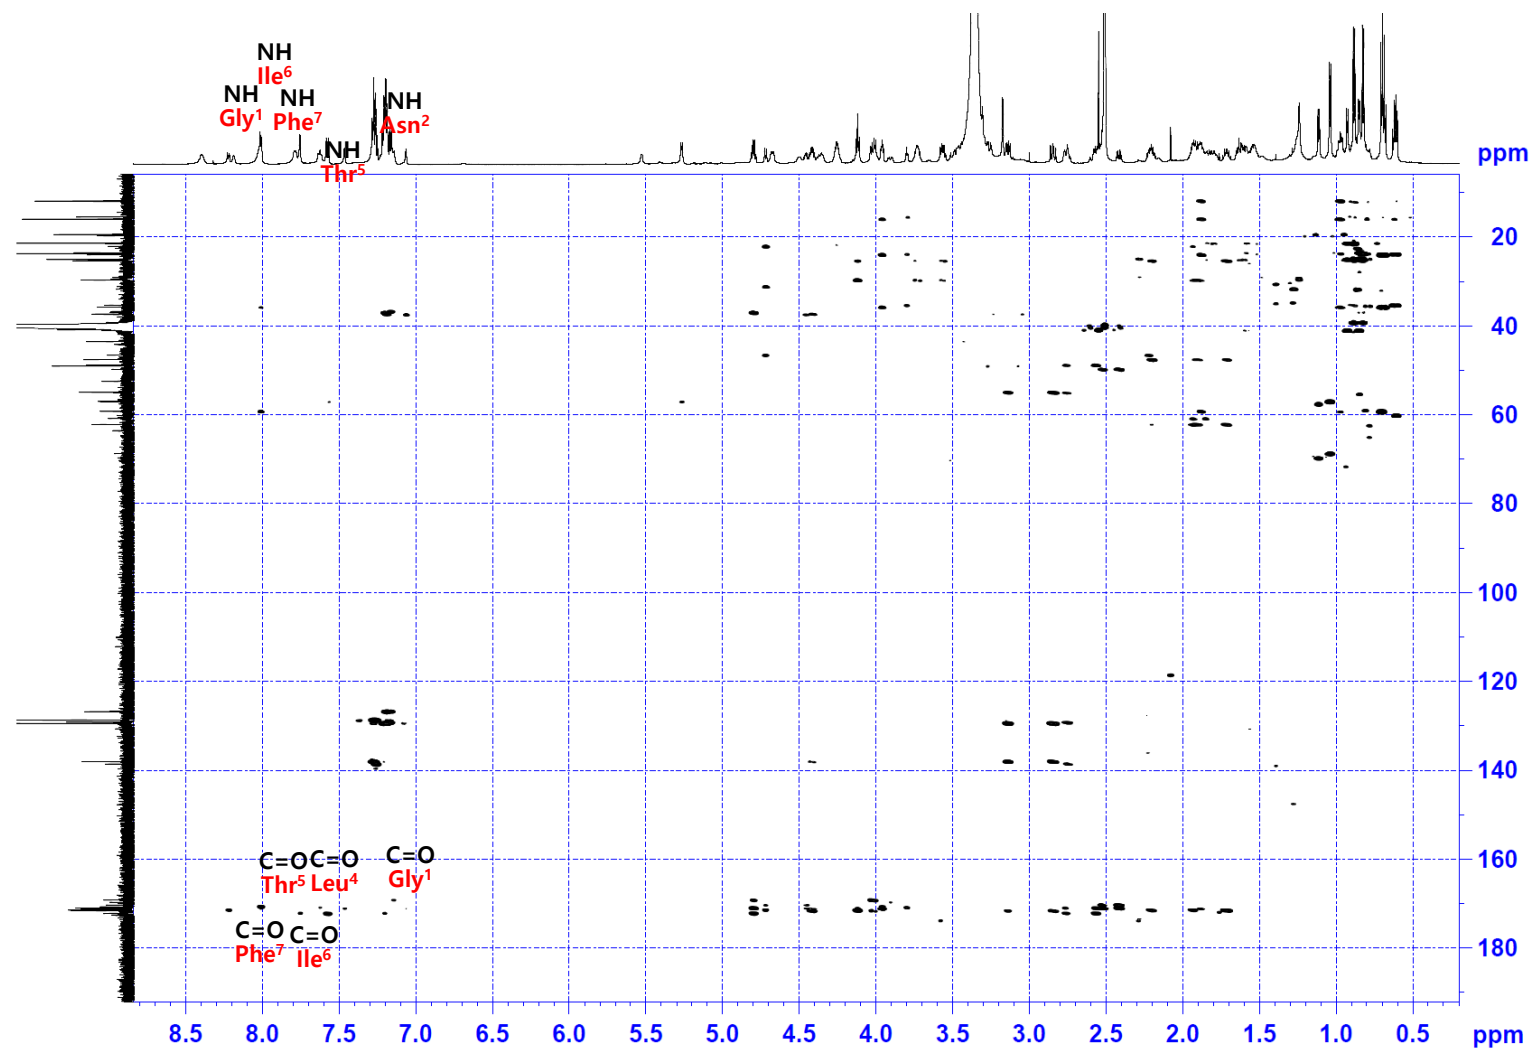

Figure S45. HMBC spectrum of compound 5



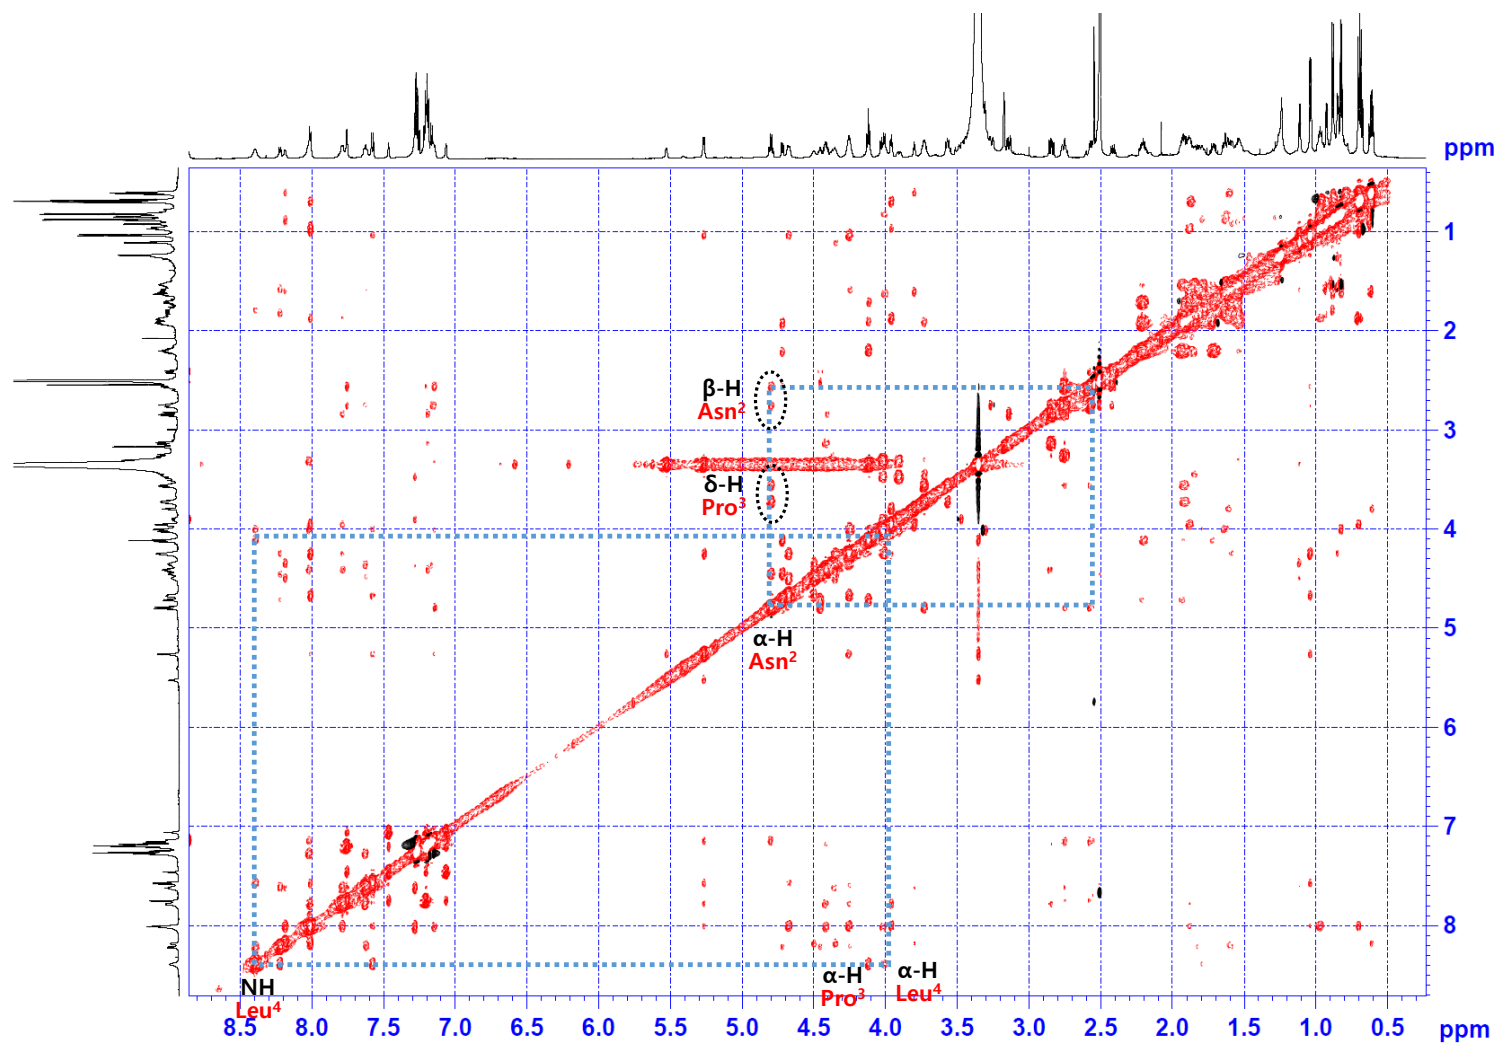

**Figure S46.** ROESY spectrum of compound **5**

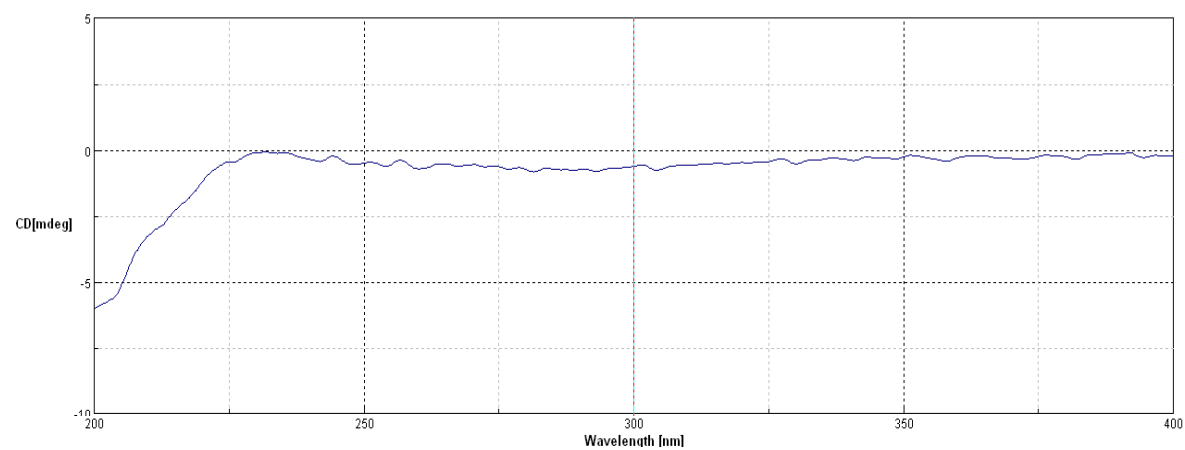

**Figure S47.** ECD spectrum of compound **5**

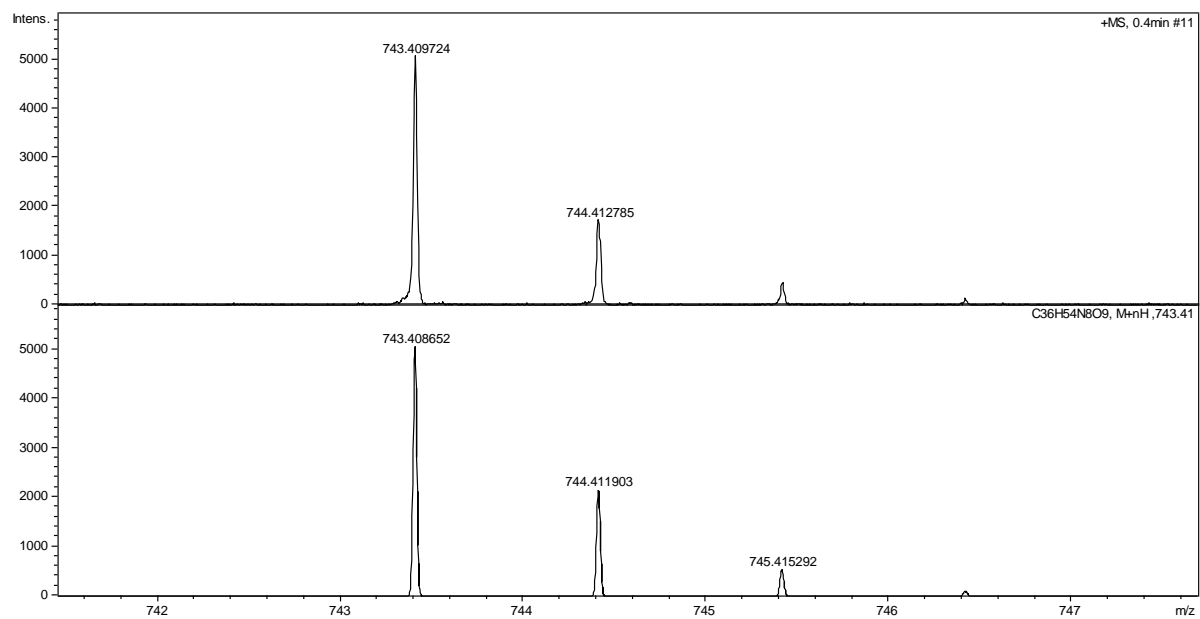

**Figure S48.** HRESI-MS spectrum of compound **5**

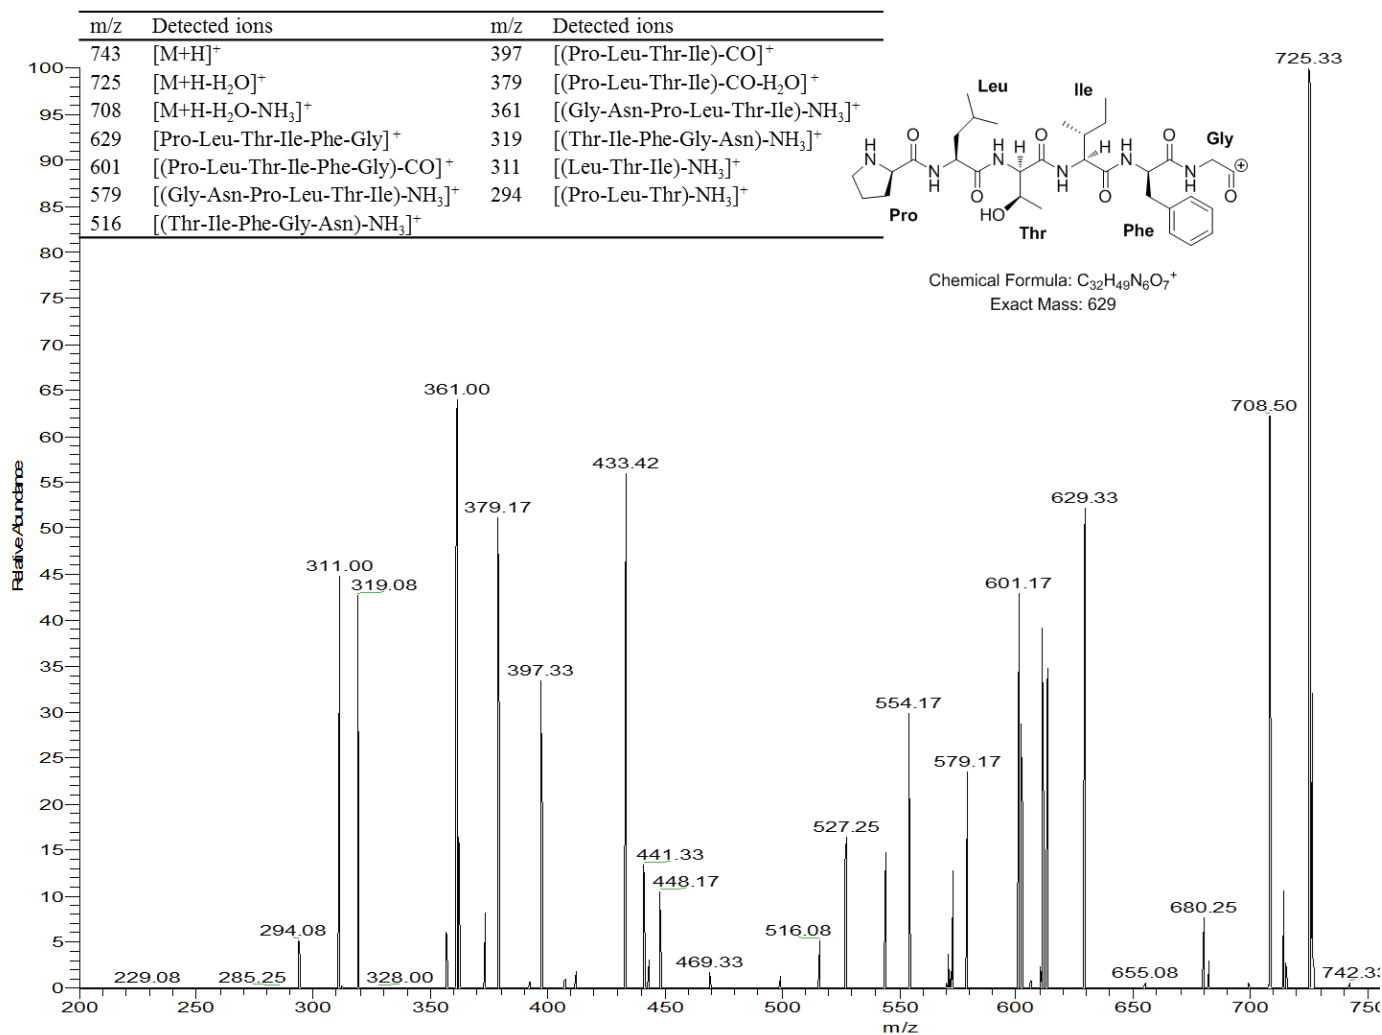

Figure S49. ESI-MS/MS spectrum of compound 5

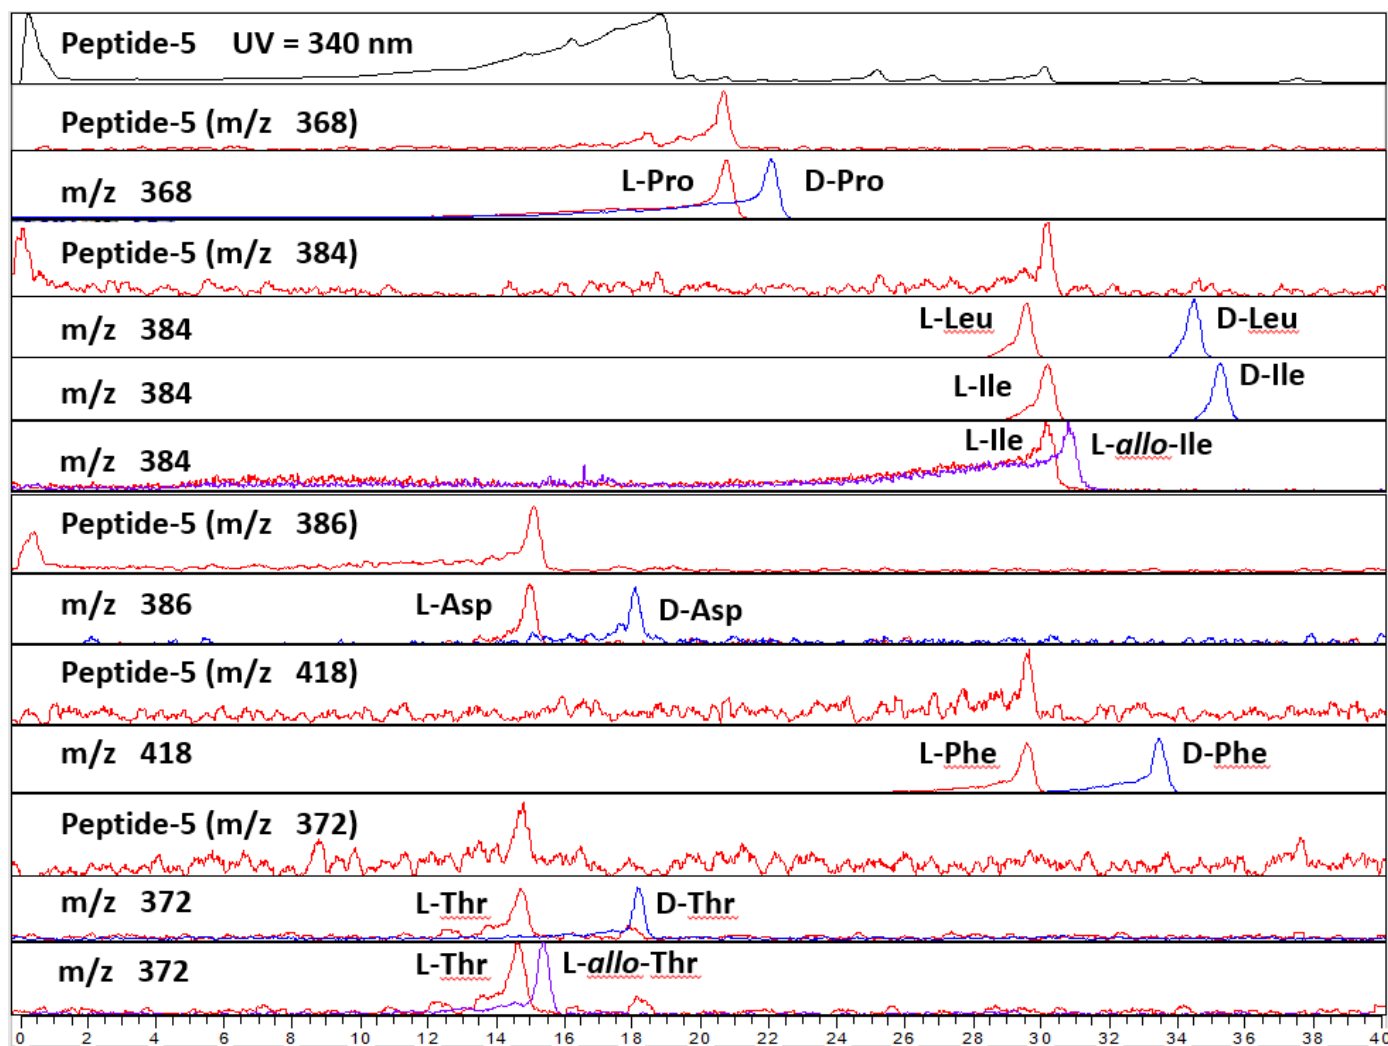

Figure S50. Marfey's analysis of compound 5
